# Supplementary material
Source: publisher figshare collection journal article supplement (https://acs.figshare.com/ndownloader/files/4583326)
Supplement: Supplementary file 1 [file 4583326]

## Supporting Information

# Stable Pre-formed Chiral Palladium Catalysts for the One-Pot Asymmetric Reductive Amination of Ketones

Laura Rubio-Pérez,\* F. Javier Pérez-Flores, Pankaj Sharma, Luis Velasco and Armando  
Cabrera

*Instituto de Química, Universidad Nacional Autónoma de México, Circuito Exterior, Ciudad Universitaria,  
México 04510, D. F., México.*

[laurarpz@correo.unam.mx](mailto:laurarpz@correo.unam.mx)

### Table of Contents.

|                                                                                     |        |
|-------------------------------------------------------------------------------------|--------|
| General and materials.....                                                          | S2-3   |
| The preparation of chiral palladium complexes.....                                  | S3     |
| General procedure for asymmetric reductive amination reaction of alkyl ketones..... | S4     |
| Characterization for these products .....                                           | S4-16  |
| General procedure for asymmetric reductive amination reaction of aryl ketones ..... | S16    |
| Characterization for these products.....                                            | S17-20 |
| References .....                                                                    | S20    |
| Copies of NMR, GC-MS or HPLC for all products.....                                  | S21    |

**General:** All reactions and manipulations were carried out under nitrogen atmosphere by using Schlenk-type techniques.  $^1\text{H}$  NMR,  $^{13}\text{C}$  NMR and  $^{31}\text{P}$  NMR spectra were obtained on a JEOL GX300 Bruker-Avance 300, Varian Unity 300 (300, 75 and 121 MHz respectively), and Varian Inova Plus 500 (500 for  $^1\text{H}$  and 125 MHz for  $^{13}\text{C}$ ) spectrometers using TMS as the internal reference in  $\text{CDCl}_3$  as solvent at  $25^\circ\text{C}$ . All chemical shifts are reported in ppm ( $\delta$ ). Coupling constants ( $J$ ) are reported in Hz to apparent peak multiplications. 2D NOESY and  $^1\text{H}/^{13}\text{C}$  HSQC sequences were used for help the assignments of the  $^1\text{H}$  and  $^{13}\text{C}$  spectra. IR spectra were recorded on a Nicolet FTIR Magna 750 spectrophotometer. Optical rotations were measured on a Perkin-Elmer 343 spectropolarimeter. Mass spectra were obtained using a JEOL JMS-SX102A instrument with *m*-nitrobenzyl alcohol as the matrix ( $\text{FAB}^+$  mode), and a JEOL JMS-AX505-A GC/MS-EI at 70 eV. Elemental compositions were calculated within an uncertainty of 5 ppm by using the program installed in the computer system. Elemental analyses for some compounds were obtained on a Elemental Analyzer CE-440. GC-MS analyses were conducted on a Hewlett Packard 5890 (series II) instrument coupled with a JEOL JMS-AX505-A GC/MS-EI at 70 eV instrument equipped with a FID detector and a chiral capillary column Cyclodex- $\beta$  (0.32 mm x 0.32 mm x 50 m) using He as a carrier gas. HPLC analyses were performed on a Hewlett Packard 1100 system with UV-DAD. Separations were achieved on a Daicel Chiracel OD-H (25 x 4.6mm) column. Flash column chromatography was performed on silica gel (70-230 mesh). X-ray determination was collected on a Bruker SMART APEX CCD area diffractometer by the  $\omega$ -scan method.

**Materials:** All reagents were obtained from commercial suppliers and used without further purification. Molecular sieves (5 Å) were activated by flame under vacuum and stored at  $200^\circ\text{C}$ . Diethyl ether and benzene were distilled from sodium-benzophenone under nitrogen. Chloroform ( $\text{CHCl}_3$ ) was distilled from  $\text{P}_2\text{O}_5$  under nitrogen. All other solvents were HPLC grade.  $\text{PdBr}_2$  (palladium dibromide), BINAP [(*rac*)-2,2'-Bis(diphenylphosphine)-1,1'-binaphthyl], (*R*)-BINAP [(+)-2,2'-Bis(diphenylphosphine)-1,1'-binaphthyl], (*S*)-BINAP [(-)-2,2'-Bis(diphenylphosphine)-1,1'-binaphthyl], (*R*)-Tol-BINAP [(+)-2,2'-Bis(di-*p*-tolylphosphine)-1,1'-binaphthyl] and (*S,S*)-CHIRAPHOS [(2*S*,3*S*)-Bis(diphenylphosphino)butane] were purchased from Strem Chemical Co. The

$[(\text{MeCN})_2]\text{PdBr}_2$  complex was prepared similar to  $[(\text{MeCN})_2]\text{PdCl}_2$  according to the previous published procedure.<sup>1</sup>

**General procedure for [(*rac*)-BINAP]PdBr<sub>2</sub> (1a), [(*R*)-BINAP]PdBr<sub>2</sub> (1b), [(*S*)-BINAP]PdBr<sub>2</sub> (1c), [(*R*)-Tol-BINAP]PdBr<sub>2</sub> (1d) and [(*S,S*)-CHIRAPHOS]PdBr<sub>2</sub> (1e) complexes:** These complexes were prepared by modified method described for the synthesis of [(*R*)-BINAP]PdCl<sub>2</sub> reported in the literature.<sup>2</sup> In a Schlenk tube,  $[(\text{MeCN})_2]\text{PdBr}_2$  (174 mg, 0.5 mmol) was suspended in 10 mL of benzene. Chiral diphosphine (0.5 mmol) was added. The suspension was stirred at room temperature for 24 h. The yellow-orange (**1a-1d**) or pinkish (**1e**) precipitate was collected by filtration, washed several times with diethyl ether and dried in vacuum. Each complex was pure enough for further purposes, but it can be crystallized by the slow diffusion of diethyl ether into a concentrated solution of the solid in a mixture of dichloromethane:acetone (1:1) to obtain red crystals for **1a-1d** and yellow crystals for **1e**.

**[(*R*)-BINAP]PdBr<sub>2</sub> (1b):** Prepared according to the general procedure from  $[(\text{MeCN})_2]\text{PdBr}_2$  (174 mg, 0.5 mmol) and [(*R*)-BINAP] (311 mg, 0.5 mmol) at room temperature for overnight, to provide the title compound as yellow solid (85%); <sup>31</sup>P NMR (121 MHz, CDCl<sub>3</sub>)  $\delta$  25.57 (s, 2P, BINAP); <sup>1</sup>H NMR (300 MHz, CDCl<sub>3</sub>)  $\delta$  7.80-6.59 (m, 32H, ArH); FAB MS (positive ion mode):  $m/z$ : 809 [ $\text{M}^+ - \text{Br}$ ]; HRMS-FAB ( $m/z$ ): calcd for C<sub>44</sub>H<sub>32</sub>BrP<sub>2</sub>Pd [ $\text{M} - \text{Br}$ ]<sup>+</sup> 809.0177, found: 809.01850; Anal. Calcd. for C<sub>44</sub>H<sub>32</sub>Br<sub>2</sub>P<sub>2</sub>Pd: C, 59.45; H, 3.63. Found: C, 59.35; H 3.60;  $[\alpha]_D^{20}$  +630 (c 0.18, acetone).

**[(*S*)-BINAP]PdBr<sub>2</sub> (1c):**  $[\alpha]_D^{20}$  -635 (c 0.18, acetone).

**[(*R*)-Tol-BINAP]PdBr<sub>2</sub> (1d):** Prepared according to the general procedure from  $[(\text{MeCN})_2]\text{PdBr}_2$  (174 mg, 0.5 mmol) and [(*R*)-Tol-BINAP] (472 mg, 0.5 mmol) at room temperature for 24 h, to provide the title compound as orange solid (88%); <sup>31</sup>P NMR (121 MHz, CDCl<sub>3</sub>)  $\delta$  28.35 (s, 2P, Tol-BINAP); <sup>1</sup>H NMR (300 MHz, CDCl<sub>3</sub>)  $\delta$  7.75-7.68 (m, 4H, ArH), 7.56 – 7.11 (m, 18H, ArH), 6.75 (d, 2H,  $J = 7.15$  Hz, ArH), 6.44 (d, 2H,  $J = 8.5$  Hz, ArH), 2.36 (s, 6H, -CH<sub>3</sub>), 1.98 (s, 6H, -CH<sub>3</sub>); FAB MS (positive ion mode):  $m/z$ : 865

[M<sup>+</sup> - Br]; Anal. Calcd. for C<sub>48</sub>H<sub>40</sub>Br<sub>2</sub>P<sub>2</sub>Pd: C, 61.01; H, 4.27. Found: C, 60.11; H 4.25; [α]<sub>D</sub><sup>20</sup> +641.1 (c 0.18, acetone).

**[(S,S)-CHIRAPHOS]PdBr<sub>2</sub> (1e):** Prepared according to the general procedure from [(MeCN)<sub>2</sub>]PdBr<sub>2</sub> (174 mg, 0.5 mmol) and [(S,S)-CHIRAPHOS] (213 mg, 0.5 mmol) at room temperature for 24 h, to provide the title compound as pinkish solid (78%); <sup>31</sup>P NMR (121 MHz, CDCl<sub>3</sub>) δ 64.3 (s, 2P, BINAP); <sup>1</sup>H NMR (300 MHz, CDCl<sub>3</sub>) δ 7.69 – 7.23 (m, 20H, ArH), 2.41 (m, 2H, -CHCH<sub>3</sub>), 1.06 (dd, 6H, *J* = 4.9, 7.9 Hz, -CHCH<sub>3</sub>); FAB MS (positive ion mode): *m/z*: 613 [M<sup>+</sup> - Br]; Anal. Calcd. for C<sub>28</sub>H<sub>28</sub>Br<sub>2</sub>P<sub>2</sub>Pd: C, 48.55; H, 4.07. Found: C, 48.29; H 4.05; [α]<sub>D</sub><sup>20</sup> +113.75 (c 0.2, CH<sub>3</sub>CN/CH<sub>2</sub>Cl<sub>2</sub>).

**General procedure for asymmetric reductive amination of alkyl ketones:** 1.0 mmol of the carbonyl compound, 1.5 mmol of aniline derivative were added to a stirred solution of 0.025 mmol of chiral palladium complex in 10 mL of dry CHCl<sub>3</sub> (in a Schlenk tube) and stirred under nitrogen atmosphere for 10 minutes. The solution was transferred to a 45 ml stainless steel autoclave (PARR), which contains 150 mg of activated molecular sieves 5Å previously purged with vacuum-N<sub>2</sub>. Subsequently, the reaction was taken to the desired pressure (800 psi H<sub>2</sub>), stirred in an oil bath at 70°C for 24 h. At the end of this period, the gas was liberated. The solution was analyzed by GC-MS to quantify the remaining substrate, and was later concentrated under reduced pressure, affording a crude residue, which was purified by column chromatography over silica gel (70-230 mesh), and eluted with hexane-ethyl acetate (99/1) to isolate the product.

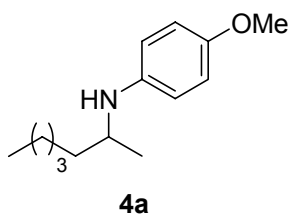

**(-)-N-(4-methoxyphenyl)-[1-(methyl)-hexyl]amine (4a) (Table 1):** Prepared according to the general procedure from 2-heptanone (140 μL, 1.0 mmol), *p*-anisidine (185 mg, 1.5 mmol) and [(*R*)-BINAP]PdBr<sub>2</sub>, **1b**, (22 mg, 0.025 mmol) at 70 °C for 24 h, to provide the title compound as a yellow oil (78%); <sup>1</sup>H NMR (300 MHz, CDCl<sub>3</sub>) δ 6.77 (d, 2H, *J* = 9.0

Hz, ArH), 6.55 (d, 2H,  $J = 8.7$  Hz, ArH), 3.74 (s, 3H,  $-\text{OCH}_3$ ), 3.36 (sext, 1H,  $J = 6.0$  Hz,  $-\text{CHCH}_3$ ), 2.99 (bs, 1H,  $-\text{NHCH}$ ), 1.57-1.28 (m, 8H,  $-\text{CH}_2$ ), 1.14 (d, 3H,  $J = 6.3$  Hz,  $-\text{CHCH}_3$ ), 0.89 (t, 3H,  $J = 6.6$  Hz,  $-\text{CH}_2\text{CH}_3$ );  $^{13}\text{C}$  NMR (75 MHz,  $\text{CDCl}_3$ )  $\delta$  151.7, 141.9, 114.9, 114.6, 55.8, 49.5, 37.1, 31.9, 25.8, 22.6, 20.7, 14.0; IR(neat) 3405, 2959, 2929, 1618, 1518, 1181, 807  $\text{cm}^{-1}$ ; EIMS (70 eV)  $m/z$  221 ( $\text{M}^+$ ); HRMS-EI  $m/z$  calcd for  $\text{C}_{14}\text{H}_{23}\text{ON}$  ( $\text{M}^+$ ) 221.1780, found 221.1775;  $[\alpha]_D^{20}$  -2.0 (c 0.4,  $\text{CHCl}_3$ ); 76% ee by HPLC (column: Daicel Chiracel OD-H; eluent hexane/ $i$ PrOH = 95/5, flow rate = 1 mL/min,  $t_R$  = 3.1 min (major),  $t_R$  = 4.5 min (minor).

With [(*R*)-Tol-BINAP]PdBr<sub>2</sub> (**1d**): 77% ee by HPLC (column: Daicel Chiracel OD-H; eluent hexane/ $i$ PrOH = 98/2, flow 1 mL/min,  $t_R$  = 4.2 min (minor),  $t_R$  = 7.4 min (major). [(*S,S*)-CHIRAPHOS]PdBr<sub>2</sub> (**1e**): 14% ee by HPLC (column: Daicel Chiracel OD-H; eluent hexane/ $i$ PrOH = 98/2, flow 1 mL/min,  $t_R$  = 4.2 min (minor),  $t_R$  = 7.5 min (major).

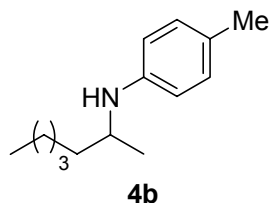

**(-)-*N*-(4-methylphenyl)-[1-(methyl)-hexyl]amine (4b)** (Table 2, entry 1): Prepared according to the general procedure from 2-heptanone (140  $\mu\text{L}$ , 1.0 mmol), *p*-toluidine (161 mg, 1.5 mmol) and [(*R*)-BINAP]PdBr<sub>2</sub>, **1b**, (22 mg, 0.025 mmol) at 70  $^{\circ}\text{C}$  for 24 h, to provide the title compound as yellow oil (84%);  $^1\text{H}$  NMR (300 MHz,  $\text{CDCl}_3$ )  $\delta$  6.99 (d, 2H,  $J = 7.9$  Hz, ArH), 6.52 (d, 2H,  $J = 8.2$  Hz, ArH), 3.43 (sext, 1H,  $J = 6.0$  Hz,  $-\text{CHCH}_3$ ), 3.28 (bs, 1H,  $-\text{NHCH}$ ), 2.25 (s, 3H,  $-\text{CH}_3$ ), 1.59-1.30 (m, 8H,  $-\text{CH}_2$ ), 1.17 (d, 3H,  $J = 6.3$  Hz,  $-\text{CHCH}_3$ ), 0.91 (t, 3H,  $J = 6.7$  Hz,  $-\text{CH}_2\text{CH}_3$ );  $^{13}\text{C}$  NMR (75 MHz,  $\text{CDCl}_3$ )  $\delta$  145.5, 129.8, 126.0, 113.4, 48.8, 37.3, 32.0, 25.9, 22.7, 20.9, 20.4, 14.1; IR(neat) 3402, 2958, 2927, 1618, 1181, 806  $\text{cm}^{-1}$ ; EIMS (70 eV)  $m/z$  205 ( $\text{M}^+$ ); Anal. Calcd (%) for  $\text{C}_{14}\text{H}_{23}\text{N}$  (205.1830): C, 82.13; H, 11.49; N, 6.39. Found: C, 82.11; H, 11.50; N, 6.38; HRMS-EI  $m/z$  calcd for  $\text{C}_{14}\text{H}_{23}\text{N}$  ( $\text{M}^+$ ) 205.1830, found 205.1830;  $[\alpha]_D^{20}$  -2.0 (c 0.4,  $\text{CHCl}_3$ ); 73% ee by HPLC (column: Daicel Chiracel OD-H; eluent hexane/ $i$ PrOH = 92/8, flow rate = 1 mL/min,  $t_R$  = 3.1 min (minor),  $t_R$  = 3.4 min (major).

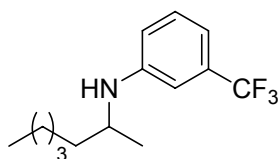

**4c**

**(-)-N-(3-trifluoromethylphenyl)-[1-(methyl)-hexyl]amine (4c) (Table 2, entry 2):**

Prepared according to the general procedure from 2-heptanone (140  $\mu$ L, 1.0 mmol), *m*-trifluoromethyl aniline (180  $\mu$ L, 1.5 mmol) and [(*R*)-BINAP]PdBr<sub>2</sub>, **1b**, (22 mg, 0.025 mmol) at 70 °C for 24 h, to provide the title compound as colorless oil (51%); <sup>1</sup>H NMR (300 MHz, CDCl<sub>3</sub>)  $\delta$  7.21 (d, 1H, *J* = 7.9 Hz, ArH), 6.87 (d, 1H, *J* = 8.2 Hz, ArH), 6.75 (s, 1H, ArH), 6.69 (d, 1H, *J* = 8.2 Hz, ArH), 3.65 (bs, 1H, -NHCH), 3.47 (sext, 1H, *J* = 6.3 Hz, -CHCH<sub>3</sub>), 1.57-1.28 (m, 8H, -CH<sub>2</sub>), 1.18 (d, 3H, *J* = 6.3 Hz, -CHCH<sub>3</sub>), 0.89 (t, 3H, *J* = 6.6 Hz, -CH<sub>2</sub>CH<sub>3</sub>); <sup>13</sup>C NMR (75 MHz, CDCl<sub>3</sub>)  $\delta$  147.8, 131.6 (Cq, *J* = 32.3Hz), 129.7, 124.4 (Cd, *J* = 272.3 Hz), 115.9, 113.1 (Cq, *J* = 4.0Hz), 109.1 (Cq, *J* = 4.0Hz), 48.5, 37.1, 31.9, 25.8, 22.7, 20.6, 14.1; IR(neat) 3426, 2961, 2931, 1614, 1517, 1162, 857 cm<sup>-1</sup>; EIMS (70 eV) *m/z* 259 (M<sup>+</sup>); HRMS-EI *m/z* calcd for C<sub>14</sub>H<sub>20</sub>NF<sub>3</sub> (M<sup>+</sup>) 259.1548, found 259.1545; [ $\alpha$ ]<sub>D</sub><sup>20</sup> -1.6 (c 0.4, CHCl<sub>3</sub>); 95% ee by HPLC (column: Daicel Chiracel OD-H; eluent hexane/<sup>i</sup>PrOH = 92/8, flow rate = 1 mL/min, *t*<sub>R</sub> = 3.0 min (minor), *t*<sub>R</sub> = 3.6 min (major).

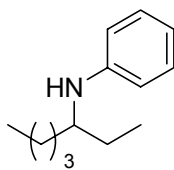

**4d**

**(+)-N-phenyl-[1-(ethyl)-pentyl]amine (4d) (Table 2, entry 3):**

Prepared according to the general procedure from 3-heptanone (140  $\mu$ L, 1.0 mmol), aniline (0.13  $\mu$ L, 1.5 mmol) and [(*R*)-BINAP]PdBr<sub>2</sub>, **1b**, (22 mg, 0.025 mmol) at 70 °C for 24 h, to provide the title compound as colorless oil (86%); <sup>1</sup>H NMR (300 MHz, CDCl<sub>3</sub>)  $\delta$  7.15 (td, 2H, *J* = 8.7, 1.5 Hz, ArH), 6.64 (tt, 1H, *J* = 1.2, 7.2 Hz, ArH), 6.57 (dd, 1H, *J* = 1.2, 8.5 Hz, ArH), 3.46 (bs, 1H, -NHCH), 3.28 (quint, 1H, *J* = 6.0 Hz, -CHCH<sub>2</sub>), 1.74 – 1.26 (m, 8H, CH<sub>2</sub>), 0.92 (t, 3H, *J* = 7.5 Hz, -CH<sub>2</sub>CH<sub>3</sub>), 0.89 (t, 3H, *J* = 7.2 Hz, -CH<sub>2</sub>CH<sub>3</sub>); <sup>13</sup>C NMR (75 MHz, CDCl<sub>3</sub>)  $\delta$  148.1, 129.2, 116.4, 112.8, 54.0, 34.0, 28.1, 27.2, 22.8, 14.0, 10.0; IR(neat) 3405, 2959, 2929, 1602, 1504, 1179, 865 cm<sup>-1</sup>; EIMS (70 eV) *m/z* 191 (M<sup>+</sup>); [ $\alpha$ ]<sub>D</sub><sup>20</sup> +2.72 (c 0.44,

CHCl<sub>3</sub>); 49% ee by GC-MS (EI) (column: Cyclodex-β, flow rate = 1 grade/min, *t<sub>R</sub>* = 28.4 min (minor), *t<sub>R</sub>* = 28.7 min (major)).

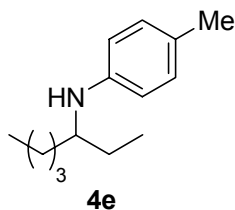

**(-)-*N*-(4-methylphenyl)-[1-(ethyl)-pentyl]-amine (4e)** (Table 2, entry 4): Prepared according to the general procedure from 3-heptanone (140 μL, 1.0 mmol), *p*-toluidine (161 mg, 1.5 mmol) and [(*S*)-BINAP]PdBr<sub>2</sub>, **1c**, (22 mg, 0.025 mmol) at 70 °C for 24 h, to provide the title compound as colorless oil (82%); <sup>1</sup>H NMR (300 MHz, CDCl<sub>3</sub>) δ 6.97 (d, 2H, *J* = 8.5 Hz, ArH), 6.50 (d, 1H, *J* = 8.4 Hz, ArH), 3.31 (bs, 1H, -NHCH), 3.25 (quint, 1H, *J* = 6.0 Hz, -CHCH<sub>2</sub>), 3.04 (s, 3H, -CH<sub>3</sub>), 1.63 – 1.27 (m, 8H, -CH<sub>2</sub>), 0.92 (t, 3H, *J* = 7.2 Hz, -CH<sub>2</sub>CH<sub>3</sub>), 0.90 (t, 3H, *J* = 7.2 Hz, -CH<sub>2</sub>CH<sub>3</sub>); <sup>13</sup>C NMR (75 MHz, CDCl<sub>3</sub>) δ 145.9, 129.7, 125.6, 113.0, 54.3, 34.1, 28.1, 27.2, 22.8, 20.3, 14.0, 10.0; IR(neat) 3404, 2959, 2929, 1618, 1518, 1151, 806 cm<sup>-1</sup>; EIMS (70 eV) *m/z* 205 (M<sup>+</sup>); HRMS-EI *m/z* calcd for C<sub>14</sub>H<sub>23</sub>N 205.1830 (M<sup>+</sup>), found 205.1833; [α]<sub>D</sub><sup>20</sup> -1.5 (c 0.54, CHCl<sub>3</sub>); 59% ee by HPLC (column: Daicel Chiracel OD-H; eluent hexane/<sup>i</sup>PrOH = 92/8, flow rate = 1 mL/min, *t<sub>R</sub>* = 3.0 min (minor), *t<sub>R</sub>* = 3.4 min (major)).

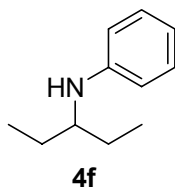

***N*-phenyl-[1-(ethyl)-propyl]amine (4f)** (Table 2, entry 5): Prepared according to the general procedure from 3-pentanone (100 μL, 1.0 mmol), aniline (130 μL, 1.5 mmol) and [(*rac*)-BINAP]PdBr<sub>2</sub>, **1a**, (22 mg, 0.025 mmol) at 70 °C for 24 h, to provide the title compound as light yellow oil (77%); <sup>1</sup>H NMR (300 MHz, CDCl<sub>3</sub>) δ 7.17 (td, 2H, *J* = 8.5, 1.1 Hz, ArH), 6.61 (t, 1H, *J* = 8.2 Hz, ArH), 6.59 (d, 2H, *J* = 8.5 Hz, ArH), 3.44 (bs, 1H, -NHCH), 3.25 (quint, 1H, *J* = 5.8 Hz, -CHCH<sub>2</sub>), 1.65 – 1.45 (m, 4H, -CH<sub>2</sub>), 0.94 (t, 6H, *J* = 7.4 Hz, -CH<sub>2</sub>CH<sub>3</sub>); <sup>13</sup>C NMR (75 MHz, CDCl<sub>3</sub>) δ 148.3, 129.3, 116.6, 113.0, 55.4, 26.8,

10.2; IR(neat) 3403, 2963, 2930, 1602, 1505, 1179, 865  $\text{cm}^{-1}$ ; EIMS (70 eV)  $m/z$  163 ( $\text{M}^+$ ); HRMS-EI  $m/z$  calcd for  $\text{C}_{11}\text{H}_{17}\text{N}$  ( $\text{M}^+$ ) 163.1361, found 163.1360.

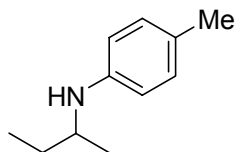

**4g**

**(-)-*N*-sec-butyl-(*p*-tolyl)amine (4g) (Table 2, entry 6):** Prepared according to the general procedure from 2-butanone (90  $\mu\text{L}$ , 1.0 mmol), *p*-toluidine (161 mg, 1.5 mmol) and [(*S*)-BINAP]PdBr<sub>2</sub>, **1c**, (22 mg, 0.025 mmol) at 70 °C for 24 h, to provide the title compound as yellow oil (77%); <sup>1</sup>H NMR (300 MHz, CDCl<sub>3</sub>)  $\delta$  6.97 (d, 2H,  $J$  = 8.2 Hz, ArH), 6.51 (d, 2H,  $J$  = 8.5 Hz, ArH), 3.36 (sext, 1H,  $J$  = 6.4 Hz, -CHCH<sub>3</sub>), 3.26 (bs, 1H, -NHCH), 2.23 (s, 3H, CH<sub>3</sub>), 1.64 – 1.55 (m, 1H, -CH<sub>2</sub>CH<sub>3</sub>), 1.50 – 1.39 (m, 1H, -CH<sub>2</sub>CH<sub>3</sub>), 1.16 (d, 3H,  $J$  = 6.3 Hz, -CHCH<sub>3</sub>), 0.94 (t, 3H,  $J$  = 7.4 Hz, -CH<sub>2</sub>CH<sub>3</sub>); <sup>13</sup>C NMR (75 MHz, CDCl<sub>3</sub>)  $\delta$  145.5, 129.8, 126.0, 113.4, 50.1, 29.7, 20.4, 20.3, 10.4; IR(neat) 3399, 2964, 2924, 1618, 1518, 1160, 807  $\text{cm}^{-1}$ ; EIMS (70 eV)  $m/z$  163 ( $\text{M}^+$ );  $[\alpha]_{\text{D}}^{20}$  -1.0 (c 0.44, CHCl<sub>3</sub>); >99% ee by HPLC (column: Daicel Chiracel OD-H; eluent hexane/<sup>*i*</sup>PrOH = 95/5, flow rate = 1 mL/min,  $t_{\text{R}}$  = 5.0 min (major),  $t_{\text{R}}$  = 5.9 min (minor).

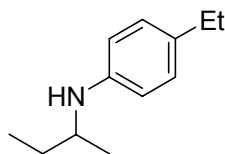

**4h**

**(-)-*N*-sec-butyl-(4-ethylphenyl)amine (4h) (Table 2, entry 7):** Prepared according to the general procedure from 2-butanone (90  $\mu\text{L}$ , 1.0 mmol), *p*-ethyl aniline (190  $\mu\text{L}$ , 1.5 mmol) and [(*R*)-BINAP]PdBr<sub>2</sub>, **1b**, (22 mg, 0.025 mmol) at 70 °C for 24 h, to provide the title compound as yellow oil (77%); <sup>1</sup>H NMR (300 MHz, CDCl<sub>3</sub>)  $\delta$  7.03 (d, 2H,  $J$  = 8.5 Hz, ArH), 6.55 (d, 2H,  $J$  = 8.5 Hz, ArH), 3.44 – 3.33 (m, 2H, -NHCH + -CHCH<sub>3</sub>), 2.55 (q, 2H,  $J$  = 7.5 Hz, -CH<sub>2</sub>CH<sub>3</sub>), 1.66 – 1.55 (m, 1H, -CH<sub>2</sub>CH<sub>3</sub>), 1.52 – 1.40 (m, 1H, -CH<sub>2</sub>CH<sub>3</sub>), 1.22 (d, 3H,  $J$  = 7.6 Hz, -CH<sub>2</sub>CH<sub>3</sub>), 1.18 (d, 3H,  $J$  = 6.3 Hz, -CH<sub>2</sub>CH<sub>3</sub>); <sup>13</sup>C NMR (75 MHz,

CDCl<sub>3</sub>)  $\delta$  145.7, 132.7, 128.6, 113.3, 50.1, 29.7, 28.0, 20.4, 16.0, 10.5; IR(neat) 3402, 2963, 2927, 1616, 1518, 1158, 819 cm<sup>-1</sup>; EIMS (70 eV)  $m/z$  177 (M<sup>+</sup>); [ $\alpha$ ]<sub>D</sub><sup>20</sup> -2.80 (c 0.5, CHCl<sub>3</sub>); 92% ee by HPLC (column: Daicel Chiracel OD-H; eluent hexane/<sup>i</sup>PrOH = 90/10, flow rate = 1 mL/min,  $t_R$  = 3.2 min (minor),  $t_R$  = 3.7 min (major)).

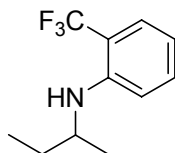

**4i**

**(+)-*N*-sec-butyl-(2-trifluoromethylphenyl)amine (4i)** (Table 2, entry 8): Prepared according to the general procedure from 2-butanone (90  $\mu$ L, 1.0 mmol), *o*-trifluoromethyl aniline (180  $\mu$ L, 1.5 mmol) and [(*S*)-BINAP]PdBr<sub>2</sub>, **1c**, (22 mg, 0.025 mmol) at 70 °C for 24 h, to provide the title compound as colorless oil (76%); <sup>1</sup>H NMR (300 MHz, CDCl<sub>3</sub>)  $\delta$  7.41 (d, 1H,  $J$  = 7.7 Hz, ArH), 7.33 (t, 1H,  $J$  = 7.9 Hz, ArH), 6.71 (d, 1H,  $J$  = 8.5 Hz, ArH), 6.65 (t, 1H,  $J$  = 7.6 Hz, ArH), 4.13 (bs, 1H, -NHCH), 3.48 (sext, 1H,  $J$  = 6.5 Hz, -CHCH<sub>3</sub>), 1.53 – 1.51 (m, 2H, -CH<sub>2</sub>CH<sub>3</sub>), 1.20 (d, 3H,  $J$  = 6.3 Hz, -CHCH<sub>3</sub>), 0.96 (t, 3H,  $J$  = 7.4 Hz, -CH<sub>2</sub>CH<sub>3</sub>); <sup>13</sup>C NMR (75 MHz, CDCl<sub>3</sub>)  $\delta$  145.3, 133.0, 126.8 (Cq,  $J$  = 5.3 Hz), 123.5, 115.2, 113.2 (Cq,  $J$  = 29.4 Hz), 112.3, 49.7, 29.5, 20.1, 10.2; IR(neat) 3468, 2969, 2929, 1615, 1586, 1168, 941 cm<sup>-1</sup>; EIMS (70 eV)  $m/z$  217 (M<sup>+</sup>); [ $\alpha$ ]<sub>D</sub><sup>20</sup> +3.33 (c 0.36, CHCl<sub>3</sub>); 82% ee by HPLC (column: Daicel Chiracel OD-H; eluent hexane/<sup>i</sup>PrOH = 92/8, flow rate = 1 mL/min,  $t_R$  = 3.8 min (major),  $t_R$  = 4.6 min (minor)).

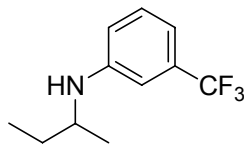

**4j**

**(*S*)-*N*-sec-butyl-(3-trifluoromethylphenyl)amine (4j)** (Table 2, entry 9): Prepared according to the general procedure from 2-butanone (90  $\mu$ L, 1.0 mmol), *m*-trifluoromethyl aniline (180  $\mu$ L, 1.5 mmol) and [(*R*)-BINAP]PdBr<sub>2</sub>, **1b**, (22 mg, 0.025 mmol) at 70 °C for 24 h, to provide the title compound as colorless oil (71%); <sup>1</sup>H NMR (300 MHz, CDCl<sub>3</sub>)  $\delta$  7.23 (t,

1H,  $J = 7.9$  Hz, ArH), 6.87 (d, 1H,  $J = 7.4$  Hz, ArH), 6.76 (s, 1H, ArH), 6.70 (d, 1H,  $J = 8.2$  Hz, ArH), 3.65 (bs, 1H, -NHCH), 3.42 (sext, 1H,  $J = 6.0$  Hz, -CHCH<sub>3</sub>), 1.64 – 1.45 (m, 2H, -CH<sub>2</sub>CH<sub>3</sub>), 1.18 (d, 3H,  $J = 6.0$  Hz, -CHCH<sub>3</sub>), 0.96 (t, 3H,  $J = 7.4$  Hz, -CH<sub>2</sub>CH<sub>3</sub>); <sup>13</sup>C NMR (75 MHz, CDCl<sub>3</sub>)  $\delta$  147.9, 131.5 (Cq,  $J = 31.7$ Hz), 129.7, 122.7, 115.9, 113.1 (Cq,  $J = 4.0$  Hz), 109.1 (Cq,  $J = 4.0$  Hz), 49.8, 29.6, 20.1, 15.8; IR(neat) 3425, 2970, 2932, 1614, 1517, 1163, 859 cm<sup>-1</sup>; EIMS (70 eV)  $m/z$  217 (M<sup>+</sup>); HRMS-EI  $m/z$  calcd for C<sub>11</sub>H<sub>14</sub>NF<sub>3</sub> (M<sup>+</sup>) 217.1078, found 217.1083;  $[\alpha]_D^{20}$  -3.01 (c 0.53, CHCl<sub>3</sub>); 75% ee by HPLC (column: Daicel Chiracel OD-H; eluent hexane/<sup>i</sup>PrOH = 92/8, flow rate = 1 mL/min,  $t_R = 3.0$  min (minor),  $t_R = 3.8$  min (major).

To determine the absolute configuration of this compound was derivatized by hydrogenolysis in presence of Pd/C and salt formation with HCl in methanol to obtain 2-butylamine hydrochloride. The obtained ammonium salt (2-butylamine hydrochloride) has optical rotation  $[\alpha]_D^{20}$  -4.8 (c 0.25, EtOH). This was compared with the optical rotation of reported 2-butylamine hydrochloride.<sup>4</sup>

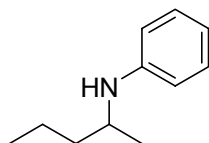

**4k**

**(-)-N-phenyl-[1-(methyl)-butyl]amine (4k) (Table 2, entry 10):** Prepared according to the general procedure from 3-penten-2-one (100  $\mu$ L, 1.0 mmol), aniline (130  $\mu$ L, 1.5 mmol) and [(S)-BINAP]PdBr<sub>2</sub>, **1c**, (22 mg, 0.025 mmol) at 70 °C for 24 h, to provide the title compound as yellow oil (78%); <sup>1</sup>H NMR (300 MHz, CDCl<sub>3</sub>)  $\delta$  7.02 (d, 2H,  $J = 8.2$  Hz, ArH), 6.55 (d, 2H,  $J = 8.2$  Hz, ArH), 3.48 (quint, 1H,  $J = 6.0$  Hz, -CHCH<sub>3</sub>), 3.31 (bs, 1H, -NHCH), 1.62 – 1.39 (m, 4H, -CH<sub>2</sub>CH<sub>3</sub>), 1.20 (d, 3H,  $J = 6.3$  Hz, -CH<sub>2</sub>CH<sub>3</sub>), 0.97 (t, 3H,  $J = 7.0$  Hz, -CH<sub>2</sub>CH<sub>3</sub>); <sup>13</sup>C NMR (75 MHz, CDCl<sub>3</sub>)  $\delta$  145.6, 129.9, 126.0, 113.4, 48.6, 39.6, 20.9, 20.5, 19.4, 14.3; IR(neat) 3383, 2959, 2924, 1616, 1513, 1172, 806 cm<sup>-1</sup>; EIMS (70 eV)  $m/z$  177 (M<sup>+</sup>); HRMS-EI  $m/z$  calcd for C<sub>12</sub>H<sub>19</sub>N (M<sup>+</sup>) 177.1517, found 177.1518;  $[\alpha]_D^{20}$  -3.40 (c 0.47, CHCl<sub>3</sub>); 10% ee by CG-MS (column: Ciclodex- $\beta$ , flow rate = 1 grade/min,  $t_R = 20.9$  min (major),  $t_R = 21.3$  min (minor)).

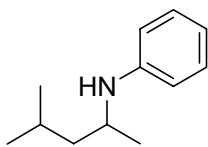

**4l**

**(-)-N-phenyl-[1-(methyl)-3-(methyl)-butyl]amine (4l) (Table 2, entry 11):** Prepared according to the general procedure from 4-methyl-2-pentanone (120  $\mu$ L, 1.0 mmol), aniline (130  $\mu$ L, 1.5 mmol) and [(*S*)-BINAP]PdBr<sub>2</sub>, **1c**, (22 mg, 0.025 mmol) at 70 °C for 24 h, to provide the title compound as yellow oil (83%); <sup>1</sup>H NMR (300 MHz, CDCl<sub>3</sub>)  $\delta$  7.17 (t, 2H, *J* = 7.4 Hz, ArH), 6.66 (t, 1H, *J* = 7.4 Hz, ArH), 6.58 (d, 2H, *J* = 7.6 Hz, ArH), 3.53 (sext, 1H, *J* = 6.3 Hz, -CHCH<sub>3</sub>), 3.39 (bs, 1H, -NHCH), 1.80 – 1.71 (m, 1H, -CH<sub>2</sub>CH<sub>3</sub>), 1.52 – 1.43 (m, 1H, -CHCH), 1.31 – 1.23 (m, 1H, -CH<sub>2</sub>CH), 1.16 (d, 3H, *J* = 6.3 Hz, -CHCH<sub>3</sub>), 0.95 (d, 3H, *J* = 6.6 Hz, -CHCH<sub>3</sub>), 0.91 (d, 3H, *J* = 6.3 Hz, -CHCH<sub>3</sub>); <sup>13</sup>C NMR (75 MHz, CDCl<sub>3</sub>)  $\delta$  147.8, 129.3, 116.8, 113.0, 47.0, 46.5, 25.1, 23.0, 22.6, 21.1; IR(neat) 3402, 2958, 2927, 1602, 1504, 1160, 866 cm<sup>-1</sup>; EIMS (70 eV) *m/z* 177 (M<sup>+</sup>); HRMS-EI *m/z* calcd for C<sub>12</sub>H<sub>19</sub>N (M<sup>+</sup>) 177.1517, found 177.1511; [ $\alpha$ ]<sub>D</sub><sup>20</sup> -1.27 (c 0.47, CHCl<sub>3</sub>); 51% ee by HPLC (column: Daicel Chiracel OD-H; eluent hexane/*i*PrOH = 92/8, flow rate = 1 mL/min, *t*<sub>R</sub> = 4.0 min (major), *t*<sub>R</sub> = 4.7 min (minor).

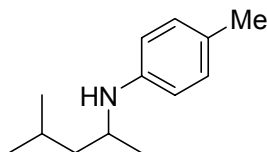

**4m**

**(-)-N-(4-methylphenyl)-[1-(methyl)-3-(methyl)-butyl]amine (4m) (Table 2, entry 12):** Prepared according to the general procedure from 4-methyl-2-pentanone (120  $\mu$ L, 1.0 mmol), *p*-toluidine (161 mg, 1.5 mmol) and [(*S*)-BINAP]PdBr<sub>2</sub>, **1c**, (22 mg, 0.025 mmol) at 70 °C for 24 h, to provide the title compound as yellow oil (73%); <sup>1</sup>H NMR (300 MHz, CDCl<sub>3</sub>)  $\delta$  6.97 (d, 2H, *J* = 8.7 Hz, ArH), 6.51 (d, 2H, *J* = 8.4 Hz, ArH), 3.49 (sext, 1H, *J* = 6.6 Hz, -CHCH<sub>3</sub>), 3.26 (bs, 1H, -NHCH), 2.23 (s, 3H, CH<sub>3</sub>), 1.81 – 1.68 (m, 1H, -CH<sub>2</sub>CH<sub>3</sub>), 1.50 – 1.41 (m, 1H, -CHCH), 1.28 – 1.19 (m, 1H, -CH<sub>2</sub>CH), 1.14 (d, 3H, *J* = 6.3 Hz, -CHCH<sub>3</sub>), 0.93 (d, 3H, *J* = 6.6 Hz, -CHCH<sub>3</sub>), 0.90 (d, 3H, *J* = 6.3 Hz, -CHCH<sub>3</sub>); <sup>13</sup>C NMR

(75 MHz, CDCl<sub>3</sub>)  $\delta$  145.4, 129.7, 125.9, 113.2, 46.9, 46.8, 25.0, 22.9, 22.6, 22.5, 21.0; IR(neat) 3397, 2957, 2924, 1617, 1517, 1162, 880 cm<sup>-1</sup>; EIMS (70 eV)  $m/z$  191 (M<sup>+</sup>);  $[\alpha]_D^{20}$  -4.25 (c 0.40, CHCl<sub>3</sub>); 90% ee by HPLC (column: Daicel Chiracel OD-H; eluent hexane/<sup>i</sup>PrOH = 95/5, flow rate = 1 mL/min,  $t_R$  = 4.9 min (major),  $t_R$  = 5.4 min (minor).

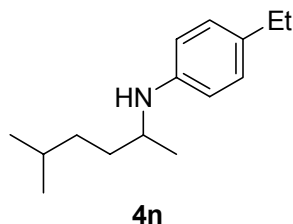

**(-)-N-(4-ethylphenyl)-[1-(methyl)-4-(methyl)-pentyl]amine (4n) (Table 2, entry 13):**

Prepared according to the general procedure from 5-methyl-2-hexanone (125  $\mu$ L, 1.0 mmol), *p*-ethyl aniline (190  $\mu$ L, 1.5 mmol) and [(*S*)-BINAP]PdBr<sub>2</sub>, **1c**, (22 mg, 0.025 mmol) at 70 °C for 24 h, to provide the title compound as yellow oil (80%); <sup>1</sup>H NMR (300 MHz, CDCl<sub>3</sub>)  $\delta$  7.00 (d, 2H,  $J$  = 8.5 Hz, ArH), 6.52 (d, 2H,  $J$  = 8.5 Hz, ArH), 3.44 – 3.33 (m, 2H, -CHCH<sub>3</sub> + -NH), 2.54 (q, 2H,  $J$  = 7.6 Hz, CH<sub>2</sub>CH<sub>3</sub>), 1.64 – 1.24 (m, 5H, -CH(CH<sub>3</sub>)<sub>2</sub> + -CH<sub>2</sub>CH<sub>3</sub>), 1.19 (t, 3H,  $J$  = 7.6 Hz, -CH<sub>2</sub>CH<sub>3</sub>), 1.16 (d, 3H,  $J$  = 6.3 Hz, -CHCH<sub>3</sub>), 0.89 (d, 3H,  $J$  = 6.6 Hz, -CHCH<sub>3</sub>), 0.88 (d, 3H,  $J$  = 6.6 Hz, -CHCH<sub>3</sub>); <sup>13</sup>C NMR (75 MHz, CDCl<sub>3</sub>)  $\delta$  148.7, 132.6, 128.6, 113.2, 49.1, 35.4, 35.1, 28.2, 27.9, 22.8, 22.7, 20.9, 16.0; IR(neat) 3403, 2959, 2928, 1616, 1518, 1158, 818 cm<sup>-1</sup>; EIMS (70 eV)  $m/z$  219 (M<sup>+</sup>); HRMS-EI  $m/z$  calcd for C<sub>15</sub>H<sub>25</sub>N (M<sup>+</sup>) 219.1987, found 219.1984;  $[\alpha]_D^{20}$  -0.70 (c 0.43, CHCl<sub>3</sub>); 83% ee by HPLC (column: Daicel Chiracel OD-H; eluent hexane/<sup>i</sup>PrOH = 95/5, flow rate = 1 mL/min,  $t_R$  = 3.6 min (major),  $t_R$  = 4.9 min (minor).

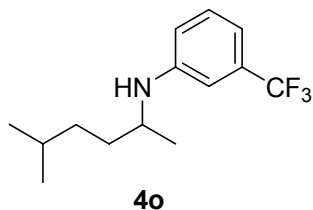

**(-)-N-(3-trifluoromethylphenyl)-[1-(methyl)-4-(methyl)-pentyl]amine (4o) (Table 2, entry 14):**

Prepared according to the general procedure from 5-methyl-2-hexanone (125  $\mu$ L, 1.0 mmol), *m*-trifluoromethyl aniline (180  $\mu$ L, 1.5 mmol) and [(*S*)-BINAP]PdBr<sub>2</sub>, **1c**,

(22 mg, 0.025 mmol) at 70 °C for 24 h, to provide the title compound as colorless oil (71%);  $^1\text{H}$  NMR (300 MHz,  $\text{CDCl}_3$ )  $\delta$  7.25 (t, 1H,  $J = 7.7$  Hz, ArH), 6.90 (d, 1H,  $J = 7.7$  Hz, ArH), 6.79 (s, 2H, 1H, ArH), 6.71 (d, 1H,  $J = 7.9$  Hz, ArH), 3.63 (bs, 1H, -NHCH), 3.47 (sext, 1H,  $J = 6.3$  Hz, -CHCH $_3$ ), 1.64 – 1.25 (m, 5H, -CH(CH $_3$ ) $_2$  + -CH $_2$ CH $_3$ ), 1.20 (d, 3H,  $J = 6.3$  Hz, -CHCH $_3$ ), 0.93 (d, 3H,  $J = 6.6$  Hz, -CHCH $_3$ ), 0.92 (d, 3H,  $J = 6.6$  Hz, -CHCH $_3$ ); IR(neat) 3425, 2960, 2931, 1614, 1516, 1164, 858  $\text{cm}^{-1}$ ; EIMS (70 eV)  $m/z$  259 ( $\text{M}^+$ ); HRMS-EI  $m/z$  calcd for  $\text{C}_{14}\text{H}_{20}\text{NF}_3$  ( $\text{M}^+$ ) 259.1548, found 259.1545;  $[\alpha]^{20}_{\text{D}} -2.08$  (c 0.24,  $\text{CHCl}_3$ ); 82% ee by HPLC (column: Daicel Chiracel OD-H; eluent hexane/ $^i$ PrOH = 90/10, flow rate = 1 mL/min,  $t_{\text{R}} = 3.8$  min (major),  $t_{\text{R}} = 5.1$  min (minor)).

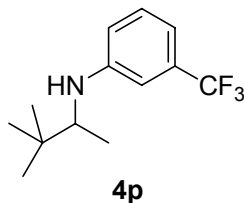

**(-)-N-(3-trifluoromethylphenyl)-[1-(methyl)-2,2-(dimethyl)-propyl]-amine (4p) (Table 2, entry 15):** Prepared according to the general procedure from 3,3-dimethyl-2-butanone (90  $\mu\text{L}$ , 1.0 mmol), *m*-trifluoromethyl aniline (180  $\mu\text{L}$ , 1.5 mmol) and [(*R*)-BINAP]PdBr $_2$ , **1b**, (22 mg, 0.025 mmol) at 70 °C for 24 h, to provide the title compound as colorless oil (89%);  $^1\text{H}$  NMR (300 MHz,  $\text{CDCl}_3$ )  $\delta$  7.21 (t, 1H,  $J = 7.9$  Hz, ArH), 6.85 (d, 1H,  $J = 7.4$  Hz, ArH), 6.77 (s, 1H, ArH), 6.71 (d, 1H,  $J = 7.9$  Hz, ArH), 3.63 (bs, 1H, NHCH), 3.26 (q, 1H,  $J = 6.0$  Hz, -CHCH $_3$ ), 1.10 (d, 3H,  $J = 6.3$  Hz, -CHCH $_3$ ), 0.97 (s, 9H,  $J = 6.6$  Hz, -C(CH $_3$ ) $_3$ );  $^{13}\text{C}$  NMR (75 MHz,  $\text{CDCl}_3$ )  $\delta$  148.6, 131.6 (Cq,  $J = 31.7\text{Hz}$ ), 129.7, 122.7, 115.8, 112.9 (Cq,  $J = 4.0\text{Hz}$ ), 109.0 (Cq,  $J = 4.0\text{Hz}$ ), 57.1, 34.9, 26.5, 15.8; IR(neat) 3430, 2966, 1614, 1519, 1162, 855  $\text{cm}^{-1}$ ; EIMS (70 eV)  $m/z$  245 ( $\text{M}^+$ ); HRMS-EI  $m/z$  calcd for  $\text{C}_{13}\text{H}_{18}\text{NF}_3$  ( $\text{M}^+$ ) 245.1391, found 245.1397;  $[\alpha]^{20}_{\text{D}} -24.72$  (c 0.55,  $\text{CHCl}_3$ ); 96% ee by HPLC (column: Daicel Chiracel OD-H; eluent hexane/ $^i$ PrOH = 92/8, flow rate = 1 mL/min,  $t_{\text{R}} = 3.0$  min (minor),  $t_{\text{R}} = 3.4$  min (major)).

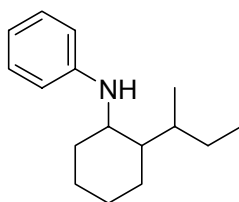

**4q**

**(-)-N-(phenyl)-[2-sec-butylcyclohexyl]amine (4q) (Table 2, entry 16):** Prepared according to the general procedure from 2-sec-butylcyclohexanone (Mixture of diastereomers with a slight 10% of diastereomeric excess, 170  $\mu$ L, 1.0 mmol), aniline (130  $\mu$ L, 1.5 mmol) and [(*R*)-BINAP]PdBr<sub>2</sub>, **1b**, (22 mg, 0.025 mmol) at 70 °C for 24 h, to provide the title compound as colorless oil (80%); First diastereomer: <sup>1</sup>H NMR (500 MHz, CDCl<sub>3</sub>)  $\delta$  7.14 (td, 2H, *J* = 2.0, 7.5 Hz, ArH), 6.62 (td, 1H, *J* = 2.0, 7.5 Hz, ArH), 6.58 (d, 2H, *J* = 2.0, 7.5 Hz, ArH), 3.77 (m, 1H, -CHNH), 3.71 (bs, 1H, -CHNH), 2.04 – 2.03 (m, 2H, cyclohexyl), 1.83 – 1.74 (m, 2H, cyclohexyl), 1.55 – 1.08 (m, 7H, cyclohexyl and butyl), 0.87 (d, 3H, *J* = 6.5 Hz, -CHCH<sub>3</sub>), 0.79 (t, 3H, *J* = 6.5 Hz, -CH<sub>2</sub>CH<sub>3</sub>). <sup>13</sup>C NMR (75 MHz, CDCl<sub>3</sub>)  $\delta$  147.7, 129.3, 116.3, 112.8, 48.5, 45.1, 35.4, 29.5, 26.4, 25.9, 25.0, 20.3, 16.6, 10.6; Second diastereomer: <sup>1</sup>H NMR (500 MHz, CDCl<sub>3</sub>)  $\delta$  7.14 (td, 2H, *J* = 2.0, 7.5 Hz, ArH), 6.62 (td, 1H, *J* = 2.0, 7.5 Hz, ArH), 6.58 (d, 2H, *J* = 2.0, 7.5 Hz, ArH), 3.77 (m, 1H, -CHNH), 3.71 (bs, 1H, -CHNH), 2.02 – 2.00 (m, 2H, cyclohexyl), 1.83 – 1.74 (m, 2H, cyclohexyl), 1.55 – 1.08 (m, 7H, cyclohexyl and butyl), 0.85 (d, 3H, *J* = 6.5 Hz, -CHCH<sub>3</sub>), 0.82 (t, 3H, *J* = 6.5 Hz, -CH<sub>2</sub>CH<sub>3</sub>). <sup>13</sup>C NMR (75 MHz, CDCl<sub>3</sub>)  $\delta$  147.7, 129.3, 116.3, 112.8, 48.3, 44.8, 35.8, 29.5, 26.3, 26.2, 24.9, 20.3, 16.1, 10.5; IR(neat) 3429, 3051, 2926, 1601, 1154, 860 cm<sup>-1</sup>; EIMS (70 eV) *m/z* 231 (M<sup>+</sup>); HRMS-EI *m/z* calcd for C<sub>16</sub>H<sub>25</sub>N (M<sup>+</sup>) 231.1987, found 231.1991; [ $\alpha$ ]<sub>D</sub><sup>20</sup> -36.2 (c 0.16, CHCl<sub>3</sub>); 53 and 66% de by GC-MS (EI) [column: Cyclodex- $\beta$ , flow rate = 1.2 grade/min, *t*<sub>R</sub> = 55.7 min (minor), *t*<sub>R</sub> = 56.1 min (major) and *t*<sub>R</sub> = 57.5 min (minor), *t*<sub>R</sub> = 57.8 min (major) respectively].

*Notes:*

1. The injection of 2-sec-butylcyclohexanone by GC-MS employing a non chiral column was detected two peaks with *t*<sub>R</sub> = 26.7 min (major) and *t*<sub>R</sub> = 26.8 min (minor) with a slight diastereomeric excess of 10%. When this substrate was aminated with aniline using [(*rac*)-BINAP]PdBr<sub>2</sub> (**1a**), two pairs of diastereomers of the desired product (**4n**) were detected by

GC-MS (EI) [column: Cyclodex- $\beta$ , flow rate = 1.2 grade/min,  $t_R$  = 55.7 min (major),  $t_R$  = 56.0 min (major) and  $t_R$  = 57.5 min (minor),  $t_R$  = 57.7 min (minor) respectively] with the same intensity. See S80.

2. When [(*S*)-BINAP]PdBr<sub>2</sub> (**1c**) complex was used:  $[\alpha]_D^{20}$  +33.0 (c 0.16, CHCl<sub>3</sub>); 57 and 69% of diastereomeric excess was detected by GC-MS (EI) [column: Cyclodex- $\beta$ , flow rate = 1.2 grade/min,  $t_R$  = 55.7 min (minor),  $t_R$  = 56.0 min (major) and  $t_R$  = 57.6 min (minor),  $t_R$  = 57.8 min (major) respectively]. These values are opposite to [(*R*)-BINAP]PdBr<sub>2</sub> (**1b**) was used. See S82.

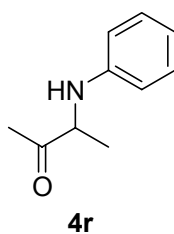

**(-)-*N*-(phenyl)-[1-(methyl)-2-(one)-propyl]amine (4r) (Table 2, entry 17):** Prepared according to the general procedure from 2,3-butanedione (90  $\mu$ L, 1.0 mmol), aniline (130  $\mu$ L, 1.5 mmol) and [(*S*)-BINAP]PdBr<sub>2</sub>, **1c**, (22 mg, 0.025 mmol) at 70 °C for 24 h, to provide the title compound as yellow oil (85%); <sup>1</sup>H NMR (300 MHz, CDCl<sub>3</sub>)  $\delta$  7.18 (td, 2H,  $J$  = 7.4, 1.6 Hz, ArH), 6.72 (t, 1H,  $J$  = 7.4 Hz, ArH), 6.56 (d, 2H,  $J$  = 7.4 Hz, ArH), 4.39 (bs, 1H, -NHCH), 4.06 (q, 1H,  $J$  = 7.3 Hz, -CHCH<sub>3</sub>), 2.21 (s, 3H, -COCH<sub>3</sub>), 1.41 (d, 3H,  $J$  = 6.8 Hz, -CHCH<sub>3</sub>); <sup>13</sup>C NMR (75 MHz, CDCl<sub>3</sub>)  $\delta$  210.4 (-CO), 146.5, 129.5, 118.0, 113.0, 58.6, 25.8, 18.0; IR(neat) 3391, 2977, 2930, 1712(CO), 1602, 1505, 1177, 872 cm<sup>-1</sup>; EIMS (70 eV)  $m/z$  163 (M<sup>+</sup>);  $[\alpha]_D^{20}$  -1.62 (c 0.43, CHCl<sub>3</sub>); 20% ee by HPLC (column: Daicel Chiracel OD-H; eluent hexane/<sup>i</sup>PrOH = 90/10, flow rate = 1 mL/min,  $t_R$  = 8.6 min (major),  $t_R$  = 10.8 min (minor).

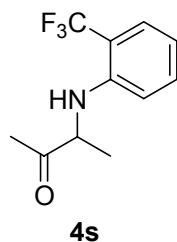

**(-)-N-(2-trifluoromethylphenyl)-[1-(methyl)-2-(one)-propyl]amine (4s)** (Table 2, entry 18): Prepared according to the general procedure from 2,3-butanedione (90  $\mu$ L, 1.0 mmol), *o*-trifluoromethyl aniline (180  $\mu$ L, 1.5 mmol) and [(*R*)-BINAP]PdBr<sub>2</sub>, **1b**, (22 mg, 0.025 mmol) at 70 °C for 24 h, to provide the title compound as colorless oil (83%); <sup>1</sup>H NMR (300 MHz, CDCl<sub>3</sub>)  $\delta$  7.46 (d, 1H, *J* = 7.4 Hz, ArH), 7.33 (t, 1H, *J* = 7.7 Hz, ArH), 6.73 (t, 1H, *J* = 7.7 Hz, ArH), 6.54 (d, 1H, *J* = 8.2 Hz, ArH), 5.12 (bs, 1H, -NHCH), 4.10 (q, 1H, *J* = 6.7 Hz, -CHCH<sub>3</sub>), 2.19 (s, 3H, -CH<sub>3</sub>), 1.44 (d, 3H, *J* = 7.1 Hz, -CHCH<sub>3</sub>); <sup>13</sup>C NMR (75 MHz, CDCl<sub>3</sub>)  $\delta$  209.1 (-CO), 143.9, 133.3, 127.0 (Cq, *J* = 5.6 Hz), 123.3, 119.9, 116.7, 114.0 (Cq, *J* = 29.4 Hz), 58.2, 20.3, 17.7; IR(neat) 3423, 2985, 2929, 1721(CO), 1614, 1520, 1145, 752 cm<sup>-1</sup>; EIMS (70 eV) *m/z* 231 (M<sup>+</sup>); [ $\alpha$ ]<sub>D</sub><sup>20</sup> -1.0 (c 0.4, CHCl<sub>3</sub>); 2% ee by HPLC (column: Daicel Chiracel OD-H; eluent hexane/<sup>i</sup>PrOH = 99/1, flow rate = 1 mL/min, *t*<sub>R</sub> = 6.4 min (minor), *t*<sub>R</sub> = 6.8 min (major).

**General procedure for asymmetric reductive amination of aryl ketones:** 1.0 mmol of the acetophenone derivative, 1.5 mmol of aniline derivative were added to a stirred solution of 0.025 mmol of chiral palladium complex in 10 mL of dry CHCl<sub>3</sub> (in a Schlenk tube) and stirred for 10 minutes. The solution was transferred to a 45 ml stainless steel autoclave (PARR) that contained 150 mg of molecular sieves 5Å previously purged with vacuum-N<sub>2</sub>. Subsequently, the reaction was taken to the desired pressure (800 psi H<sub>2</sub>), stirred in an oil bath at 70°C for 24 h. At the end of this period, the gas was liberated. The solution was analyzed by GC-MS to quantify the remaining substrate, and was later concentrated under reduced pressure, affording a crude residue, which was purified by column chromatography over silica gel (70-230 mesh), and eluted with hexane-ethyl acetate (99/1) to isolate the product.

Absolute configurations of known compounds were assigned by comparison of optical rotations to literature values.

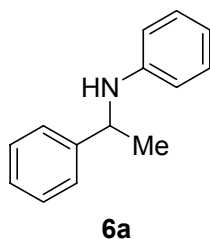

**(*R*)-(-)-*N*-[1-(phenyl)-ethyl]aniline (6a) (Table 3, entry 1):** Prepared according to the general procedure from acetophenone (110  $\mu$ L, 1 mmol), aniline (130  $\mu$ L, 1.5 mmol) and [(*S*)-BINAP]PdBr<sub>2</sub>, **1b**, (22 mg, 0.025 mmol) at 70 °C for 24 h, to provide the title compound as yellow oil (64%); <sup>1</sup>H NMR (300 MHz, CDCl<sub>3</sub>)  $\delta$  7.40 – 7.21 (m, 5H, ArH), 7.11 (dd, 2H, *J* = 8.7 Hz, ArH), 6.66 (t, 1H, *J* = 7.8 Hz, ArH), 6.53 (d, 2H, *J* = 7.8 Hz, ArH), 4.51 (q, 1H, *J* = 6.6 Hz, -CHCH<sub>3</sub>), 4.04 (bs, 1H, -NHCH), 1.54 (d, 3H, *J* = 7.0 Hz, -CHCH<sub>3</sub>); <sup>13</sup>C NMR (75 MHz, CDCl<sub>3</sub>)  $\delta$  147.2, 145.1, 129.0, 128.6, 126.8, 125.8, 117.2, 113.2, 53.4, 24.9; EIMS (70 eV) *m/z* 197 (M<sup>+</sup>); [ $\alpha$ ]<sub>D</sub><sup>20</sup> -3.6 (c 0.5, CHCl<sub>3</sub>); 43% ee by HPLC (column: Daicel Chiracel OD-H; eluent hexane/<sup>i</sup>PrOH = 92/8, flow rate = 1 mL/min, *t*<sub>R</sub> = 5.9 min (minor), *t*<sub>R</sub> = 6.9 min (major).

The absolute configuration was determined by comparison with the reported literature as (*R*) with [ $\alpha$ ]<sub>D</sub><sup>20</sup> -3.9 (c 1.0, CHCl<sub>3</sub>) and 81% ee.<sup>3</sup>

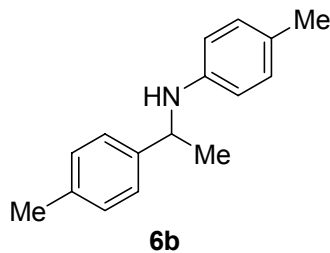

**(+)-*N*-(4-tolyl)-[1-(4-methylphenyl)-ethyl]amine (6b) (Table 3, entry 2):** Prepared according to the general procedure from *p*-methyl acetophenone (130  $\mu$ L, 1 mmol), *p*-toluidine (160.5 mg, 1.5 mmol) and [(*R*)-BINAP]PdBr<sub>2</sub>, **1c**, (22 mg, 0.025mmol) at 70 °C for 24 h, to provide the title compound as yellow oil (67%); <sup>1</sup>H NMR (300 MHz, CDCl<sub>3</sub>)  $\delta$  7.28 (d, 2H, *J* = 8.1 Hz, ArH), 7.15 (d, 2H, *J* = 7.8 Hz, ArH), 6.93 (d, 2H, *J* = 8.1 Hz, ArH), 6.43 (d, 2H, *J* = 8.4 Hz, ArH), 4.46 (q, 1H, *J* = 6.6 Hz, -CHCH<sub>3</sub>), 3.89 (bs, 1H, NHCH), 2.34 (s, 3H, -CH<sub>3</sub>), 2.21 (s, 3H, -CH<sub>3</sub>), 1.51 (d, 3H, *J* = 6.7 Hz, -CHCH<sub>3</sub>); <sup>13</sup>C NMR (75 MHz, CDCl<sub>3</sub>)  $\delta$  145.0, 142.3, 136.2, 129.5, 129.2, 126.2, 125.7, 113.4, 53.3, 24.9, 21.0,

20.3; IR(neat) 3409, 2966, 2921, 1618, 1519, 1140, 808  $\text{cm}^{-1}$ ; EIMS (70 eV)  $m/z$  225 ( $\text{M}^+$ ); Anal. Calcd for  $\text{C}_{16}\text{H}_{19}\text{N}$  (225.1517): C, 85.28; H, 8.50; N, 6.22. Found: C, 85.27; H, 8.46; N, 6.25; HRMS-EI  $m/z$  calcd for  $\text{C}_{16}\text{H}_{19}\text{N}$  ( $\text{M}^+$ ) 225.1517, found 225.1515;  $[\alpha]_{\text{D}}^{20} +10.18$  (c 0.54,  $\text{CHCl}_3$ ); 35% ee by HPLC (column: Daicel Chiracel OD-H; eluent hexane/ $i$ PrOH = 92/8, flow rate = 1 mL/min,  $t_{\text{R}}$  = 5.2 min (major),  $t_{\text{R}}$  = 6.0 min (minor).

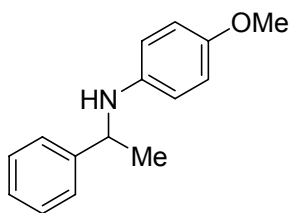

**6c**

**(*R*)-(+)-*N*-(4-methoxyphenyl)-[1-(phenyl)-ethyl]amine (6c) (Table 3, entry 3):** Prepared according to the general procedure from acetophenone (110  $\mu\text{L}$ , 1.0 mmol), *p*-anisidine (184.5 mg, 1.5 mmol) and [(*R*)-Tol-BINAP]PdBr<sub>2</sub>, **1d**, (23.6 mg, 0.025mmol) at 70 °C for 24 h, to provide the title compound as yellow oil (65%);  $^1\text{H}$  NMR (300 MHz,  $\text{CDCl}_3$ )  $\delta$  7.40 – 7.31 (m, 4H, ArH), 7.25 (d, 2H,  $J$  = 8.0 Hz, ArH), 6.71 (d, 2H,  $J$  = 8.8 Hz, ArH), 6.49 (d, 2H,  $J$  = 8.8 Hz, ArH), 4.43 (q, 1H,  $J$  = 6.6 Hz, -CHCH<sub>3</sub>), 3.49 (bs, 1H, -NHCH), 3.70 (s, 3H, -OCH<sub>3</sub>), 1.51 (d, 3H,  $J$  = 6.6 Hz, -CHCH<sub>3</sub>);  $^{13}\text{C}$  NMR (75 MHz,  $\text{CDCl}_3$ )  $\delta$  151.9, 145.6, 141.6, 128.7, 126.9, 126.0, 114.8, 114.6, 55.8, 54.3, 25.2; EIMS (70 eV)  $m/z$  227 ( $\text{M}^+$ ); Anal. Calcd for  $\text{C}_{15}\text{H}_{17}\text{NO}$  (227.1310): C, 79.26; H, 7.54; N, 6.16. Found: C, 79.25; H, 7.56; N, 6.20; HRMS-EI  $m/z$  calcd for  $\text{C}_{15}\text{H}_{17}\text{NO}$  ( $\text{M}^+$ ) 227.1310, found 227.1314;  $[\alpha]_{\text{D}}^{20} = +5.6$  (c 0.4,  $\text{CHCl}_3$ ); 35% ee by HPLC (column: Daicel Chiracel OD-H; eluent hexane/ $i$ PrOH = 92/8, flow rate = 1 mL/min,  $t_{\text{R}}$  = 6.9 min (major),  $t_{\text{R}}$  = 7.6 min (minor).

The absolute configuration was determined by comparison with the reported literature as (*R*) with  $[\alpha]_{\text{D}}^{20} +6.0$  (c 0.3,  $\text{CHCl}_3$ ) and 21% ee.<sup>5</sup>

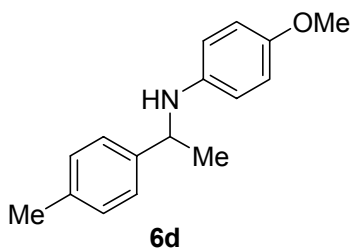

**(+)-*N*-(4-methoxyphenyl)-[1-(4-tolyl)-ethyl]amine (6d)** (Table 3, entry 4): Prepared according to the general procedure from *p*-methyl acetophenone (130  $\mu$ L, 1 mmol), *p*-anisidine (184.5 mg, 1.5 mmol) and [(*R*)-BINAP]PdBr<sub>2</sub>, **1b**, (22 mg, 0.025 mmol) at 70 °C for 24 h, to provide the title compound as yellow oil (53%); <sup>1</sup>H NMR (300 MHz, CDCl<sub>3</sub>)  $\delta$  7.25 (d, 2H, *J* = 7.7 Hz, ArH), 7.12 (d, 2H, *J* = 8.2 Hz, ArH), 6.69 (d, 2H, *J* = 8.8 Hz, ArH), 6.47 (d, 2H, *J* = 8.8 Hz, ArH), 4.39 (q, 1H, *J* = 6.6 Hz, -CHCH<sub>3</sub>), 3.71 (bs, 1H, NHCH), 3.69 (s, 3H, -OCH<sub>3</sub>), 2.32 (s, 3H, -CH<sub>3</sub>), 1.48 (d, 3H, *J* = 6.6 Hz, -CHCH<sub>3</sub>); <sup>13</sup>C NMR (75 MHz, CDCl<sub>3</sub>)  $\delta$  151.9, 142.5, 141.7, 136.4, 129.3, 125.8, 114.8, 114.6, 55.8, 25.2, 21.1; EIMS (70 eV) *m/z* 241 (M<sup>+</sup>); [ $\alpha$ ]<sub>D</sub><sup>20</sup> +6.73 (c 0.22, CHCl<sub>3</sub>); 38% ee by HPLC (column: Daicel Chiracel OD-H; eluent hexane/<sup>i</sup>PrOH = 92/8, flow rate = 1 mL/min, *t*<sub>R</sub> = 23.3 min (major), *t*<sub>R</sub> = 25.2 min (minor).

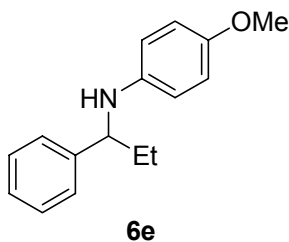

**(+)-*N*-(4-methoxyphenyl)-[1-(phenyl)-propyl]amine (6e)** (Table 3, entry 5): Prepared according to the general procedure from propiophenone (130  $\mu$ L, 1.0 mmol), *p*-anisidine (184.5 mg, 1.5 mmol) and [(*R*)-Tol-BINAP]PdBr<sub>2</sub>, **1d**, (23.6 mg, 0.025 mmol) at 70 °C for 24 h, to provide the title compound as yellow oil (57%); <sup>1</sup>H NMR (300 MHz, CDCl<sub>3</sub>)  $\delta$  7.33 – 7.21 (m, 5H, ArH), 6.68 (d, 2H, *J* = 8.8 Hz, ArH), 6.47 (d, 2H, *J* = 8.8 Hz, ArH), 4.15 (t, 1H, *J* = 6.6 Hz, -CHCH<sub>3</sub>), 3.82 (bs, 1H, NHCH), 3.69 (s, 3H, -OCH<sub>3</sub>), 1.81 (sext, 2H, *J* = 7.4 Hz, -CH<sub>2</sub>CH<sub>3</sub>), 0.94 (t, 3H, *J* = 7.4 Hz, -CH<sub>2</sub>CH<sub>3</sub>); <sup>13</sup>C NMR (75 MHz, CDCl<sub>3</sub>)  $\delta$  151.9, 144.2, 141.9, 128.5, 126.9, 126.6, 114.8, 114.5, 60.6, 55.8, 31.8, 10.9; IR(neat) 3402, 2963, 2932, 1614, 1513, 1178, 819 cm<sup>-1</sup>; EIMS (70 eV) *m/z* 241 (M<sup>+</sup>); [ $\alpha$ ]<sub>D</sub><sup>20</sup> +9.44

(c 0.54, CHCl<sub>3</sub>); 34% ee by HPLC (column: Daicel Chiracel OD-H; eluent hexane/<sup>i</sup>PrOH = 92/8, flow rate = 1 mL/min, t<sub>R</sub> = 5.6 min (major), t<sub>R</sub> = 6.0 min (minor).

## References

1. Andrews, M. A.; Chang, T. C. T.; Cheng, C. W. F.; Emge, T. J.; Kelly, K. P.; Koetzle, T. F. *J. Am. Chem. Soc.* **1984**, *106*, 5913.
2. Ozawa, F. Kubo, A.; Matsumoto, Y. Hayashi, T. *Organometallics* **1993**, *12*, 4188.
3. Cheemala, M. N.; Knochel, P. *Org. Lett.* **2007**, *9*, 3089.
4. (a) Pallavicini, M.; Bolchi, C.; Fumagalli, L.; Valoti, E., Villa, L. *Tetrahedron: Asymmetry* **2002**, *13*, 2277. (b) Grishina, G.V.; Luk'yanenko, E. R.; Borisenko, A. A. Russ. *J. Org. Chem.* **2005**, *41*, 807. (c) Andrés, C.; Nieto, J.; Pedrosa, R.; Villamañán, N. *J. Org. Chem.* **1996**, *61*, 4130.
5. Tagashira, J.; Imao, D.; Yamamoto, T.; Ohta, T.; Furukawa, I.; Ito, Y. *Tetrahedron: Asymmetry*, **2005**, *16*, 2307.

*Copies of NMR, GC-MS (EI) or HPLC for all compounds.*

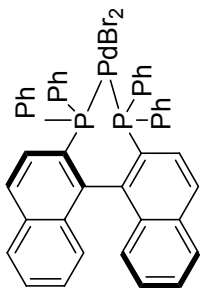

**1b**  
**(Scheme 1)**

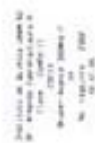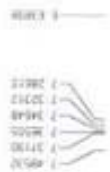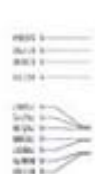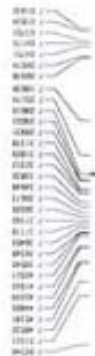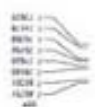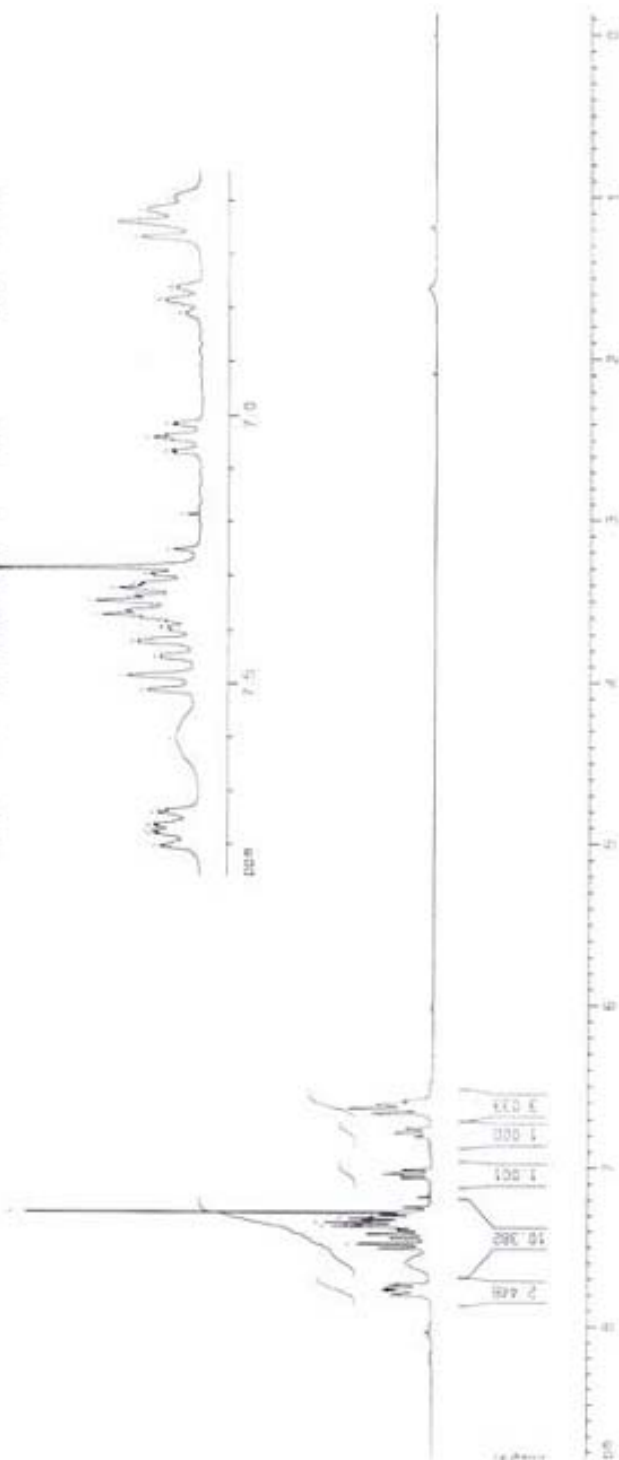

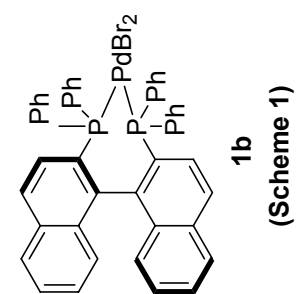

INSTITUTO DE QUÍMICA DE SÃO CARLOS  
 Av. Cristóvão Colombo, 2385  
 13560-970 - São Carlos - SP  
 Fone: (019) 231-7000  
 Fax: (019) 231-7001  
 E-mail: iqc@iqsc.usp.br

25.5723

add

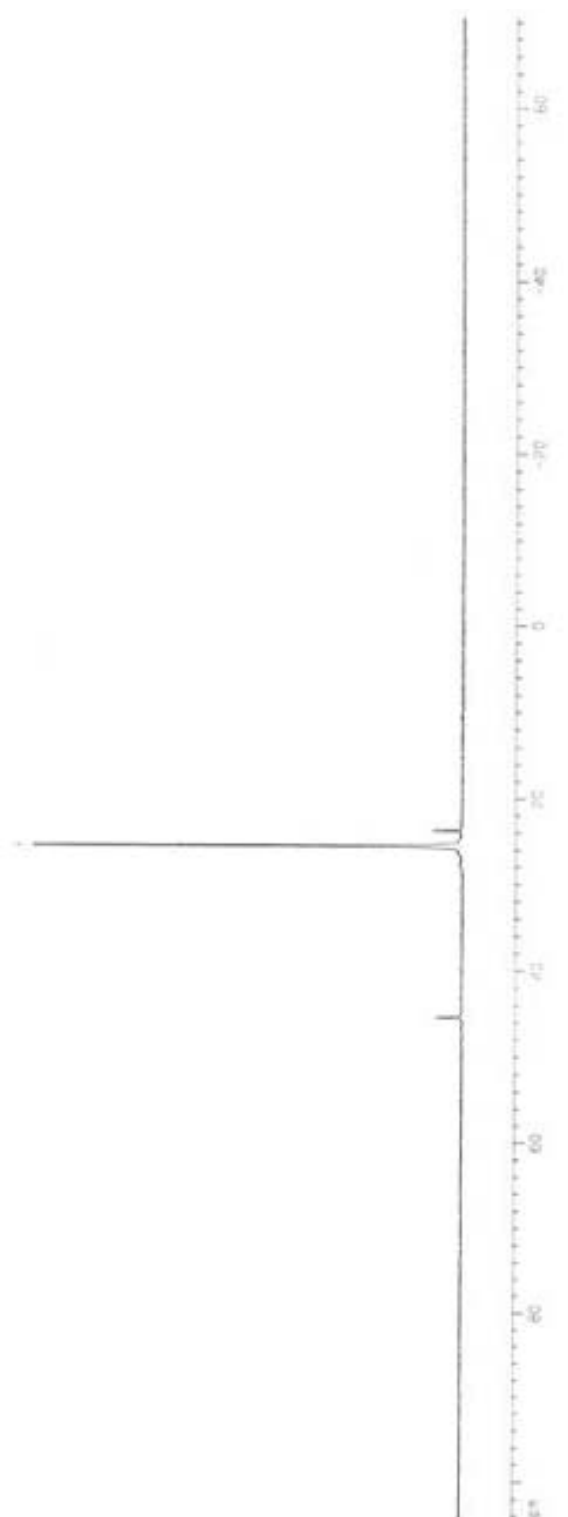

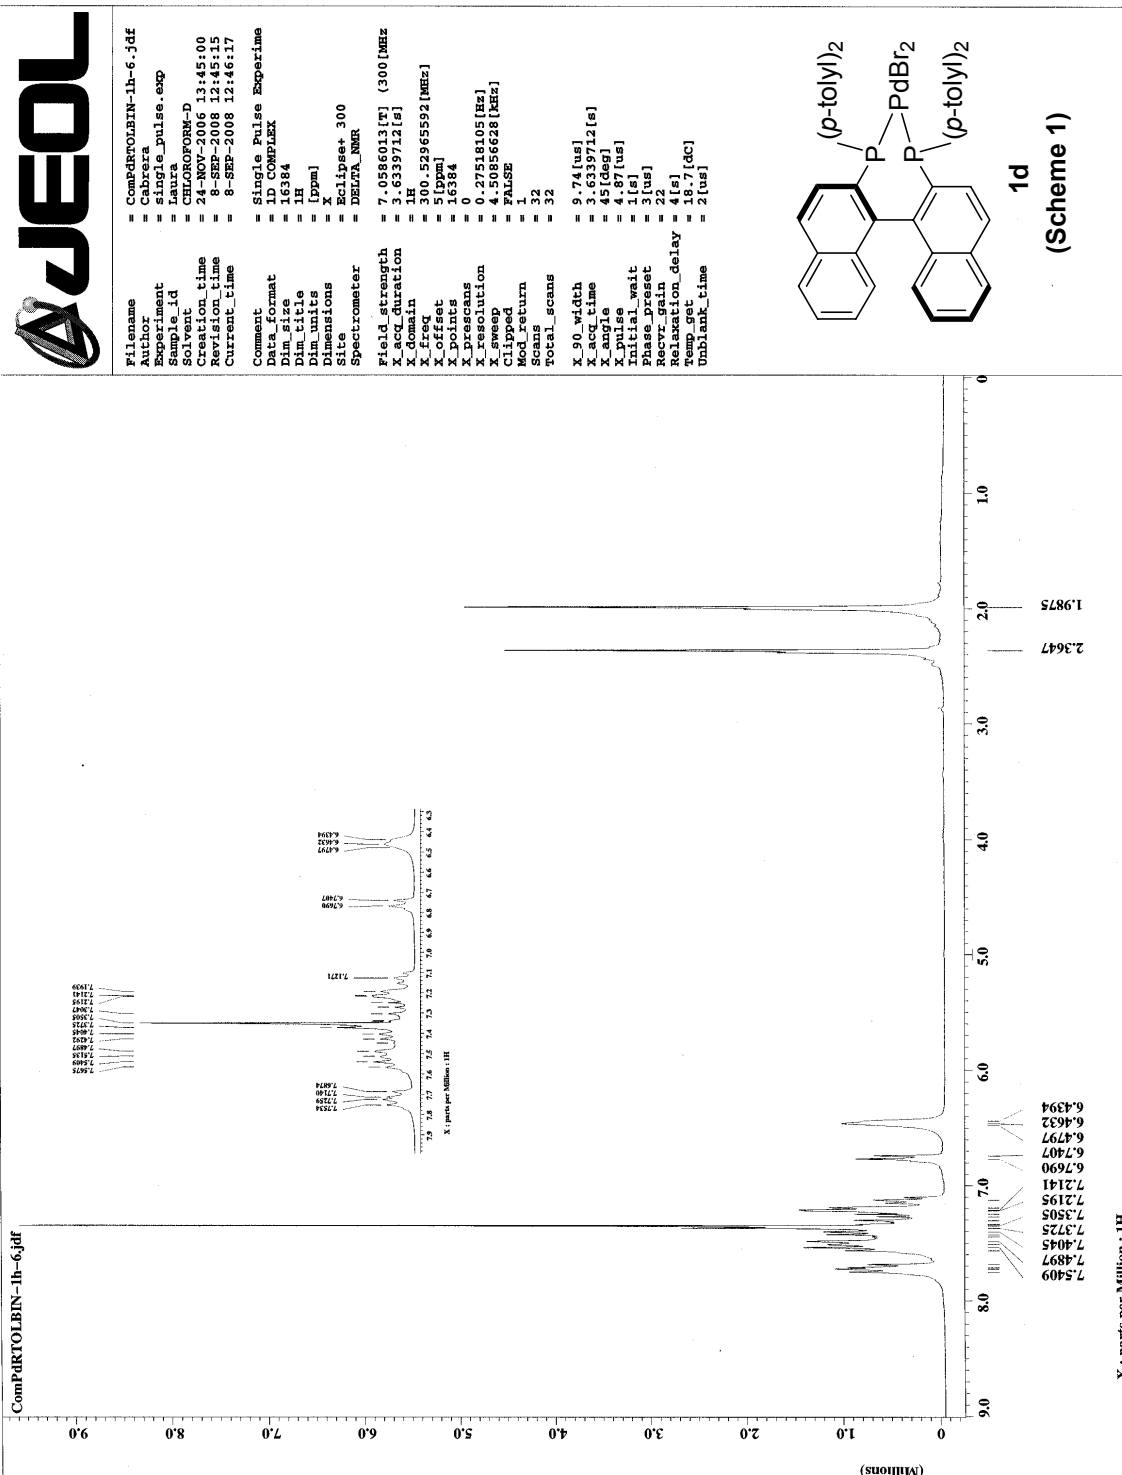

CompPdRTOLBIN-31P-5jdf

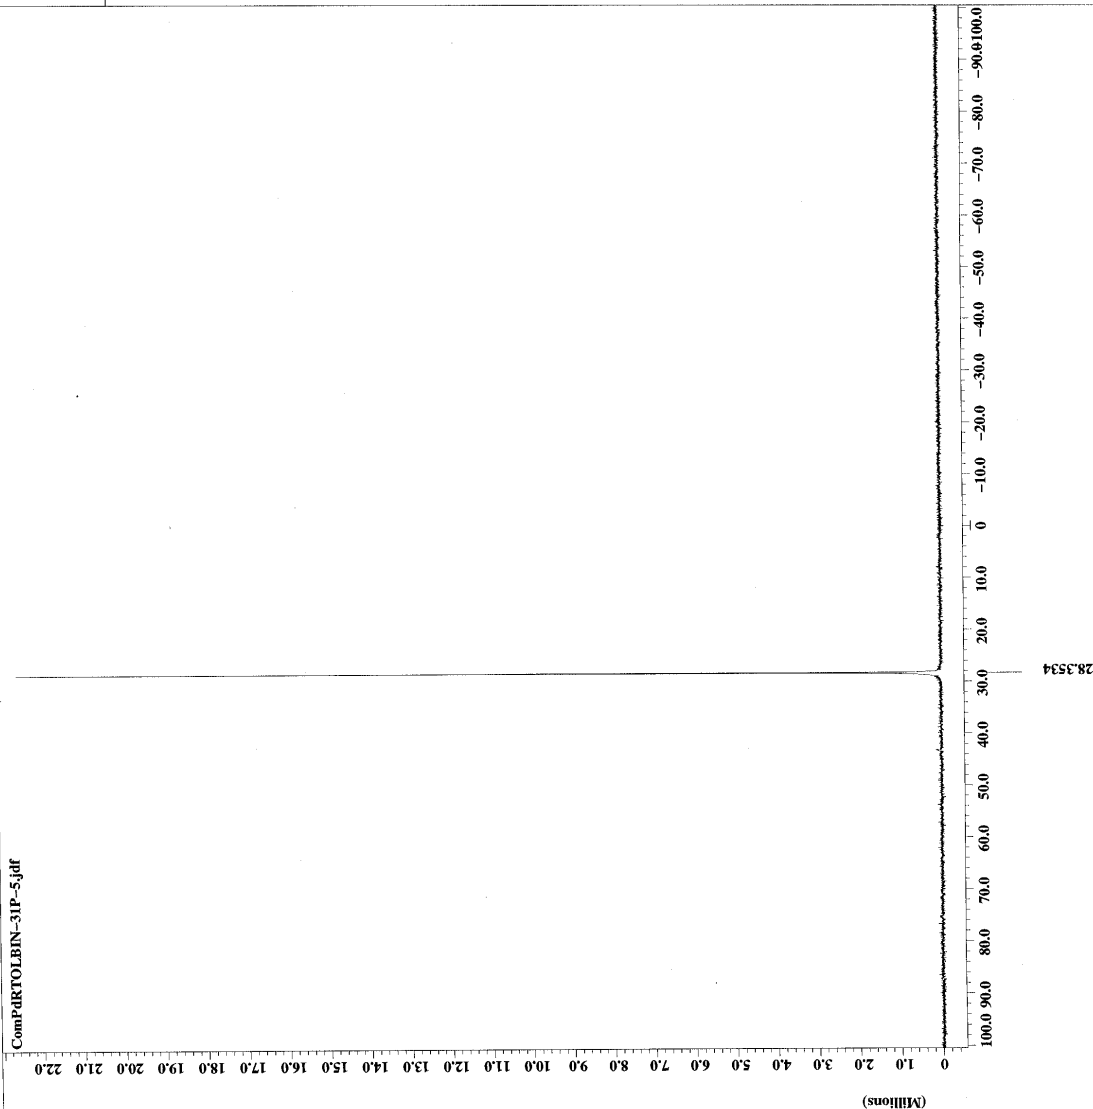

X : parts per Million : 31P

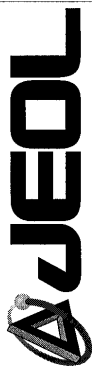

```

Filename      = CompPdRTOLBIN-31P-5.jdf
Author       = Chaitan
Experiment    = single_pulse_dec
Sample_id    = Laura
Solvent      = CHLOROFORM-D
Creation_time = 1-DEC-2006 10:11:48
Revision_time = 8-SEP-2008 12:33:29
Current_time  = 8-SEP-2008 12:39:40

Comment      = Single Pulse with Bro
Data_format  = ID COMPLEX
Dir         = 32768
Dim_title    = 31P
Dim_units    = [ppm]
Dimensions   = X
Site         = ECLIPSE+ 300
Spectrometer = DELTA_NMR

Field_strength = 7.0586013 [T] (300 [MHz]
X_acq_duration = 0.8978432 [s]
X_domain       = 31P
X_freq         = 121.65655406 [MHz]
X_offset       = 0 [ppm]
X_points       = 32768
X_prescans     = 4
X_resolution   = 11378032 [Hz]
X_sweep_rate   = 16.43635036 [kHz]
X_t1_rho       = 1H
Irr_domain     = 300.52965592 [MHz]
Irr_freq       = 5 [ppm]
Irr_offset     = FALSE
Clipped        = 1
Mod_return     = 64
Total_scans    = 64

X_90_width     = 11.5 [us]
X_acq_time     = 0.8978432 [s]
X_angle        = 30 [deg]
X_pulse        = 3.83333333 [us]
Initial_wait   = 1 [s]
Phase_preset   = 3 [us]
Relaxation_delay = 1 [s]
Temp_get       = 20.1 [dc]
Unblank_time   = 2 [us]
  
```

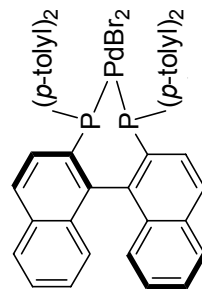

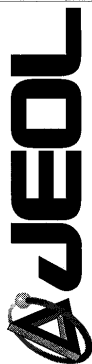

(S,S)-CHIRAPHOSPBz2-1H-11.jdt

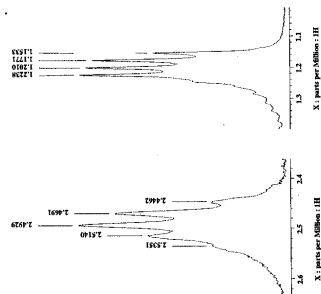

X : parts per Million : 1H

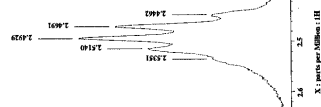

X : parts per Million : 1H

===== (S,S)-CHIRAPHOSPBz2-1H-11.jdt =====  
 File name = (S,S)-CHIRAPHOSPBz2-1H-11.jdt  
 Acquisition date = 2008-08-14 08:49:51  
 Experiment = single\_pulse.exp  
 Sample id = Laura  
 Solvent = CHLOROFORM-D  
 Creation time = 14-JUL-2008 00:34:22  
 Revision time = 25-SEP-2008 08:45:51  
 Current time = 25-SEP-2008 08:49:49  
 Comment = Single Pulse Experiment  
 Data format = 1D COMPLEX  
 Dim size = 16384  
 Dim title = 1H  
 Dim units = [ppm]  
 Dimensions = X  
 Site = Eclipse+ 300  
 Spectrometer = DELTA\_NMR  
 Field strength = 7.0586013 [T] (300 MHz)  
 X acq duration = 3.6339712 [s]  
 X domain = 1H  
 X freq = 300.52955592 [MHz]  
 X offset = 5 [ppm]  
 X points = 16384  
 X prescans = 0  
 X resolution = 0.27518105 [Hz]  
 X sweep = 4.50855628 [kHz]  
 Clipped = FALSE  
 Mod return = 1  
 Scans = 32  
 Total scans = 32  
 X 90 width = 9.5 [us]  
 X 90 time = 3.6339712 [s]  
 X angle = 45 [deg]  
 X pulse = 4.75 [us]  
 Initial wait = 1 [s]  
 Phase preset = 3 [us]  
 Recvr gain = 25  
 Relaxation delay = 1 [s]  
 Recycle delay = 1.2 [dc]  
 Dwell time = 2 [us]

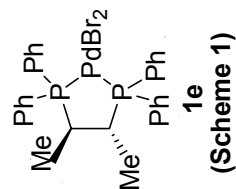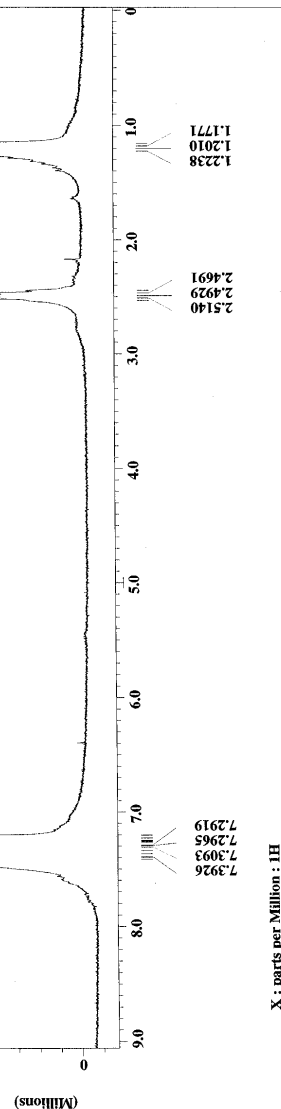

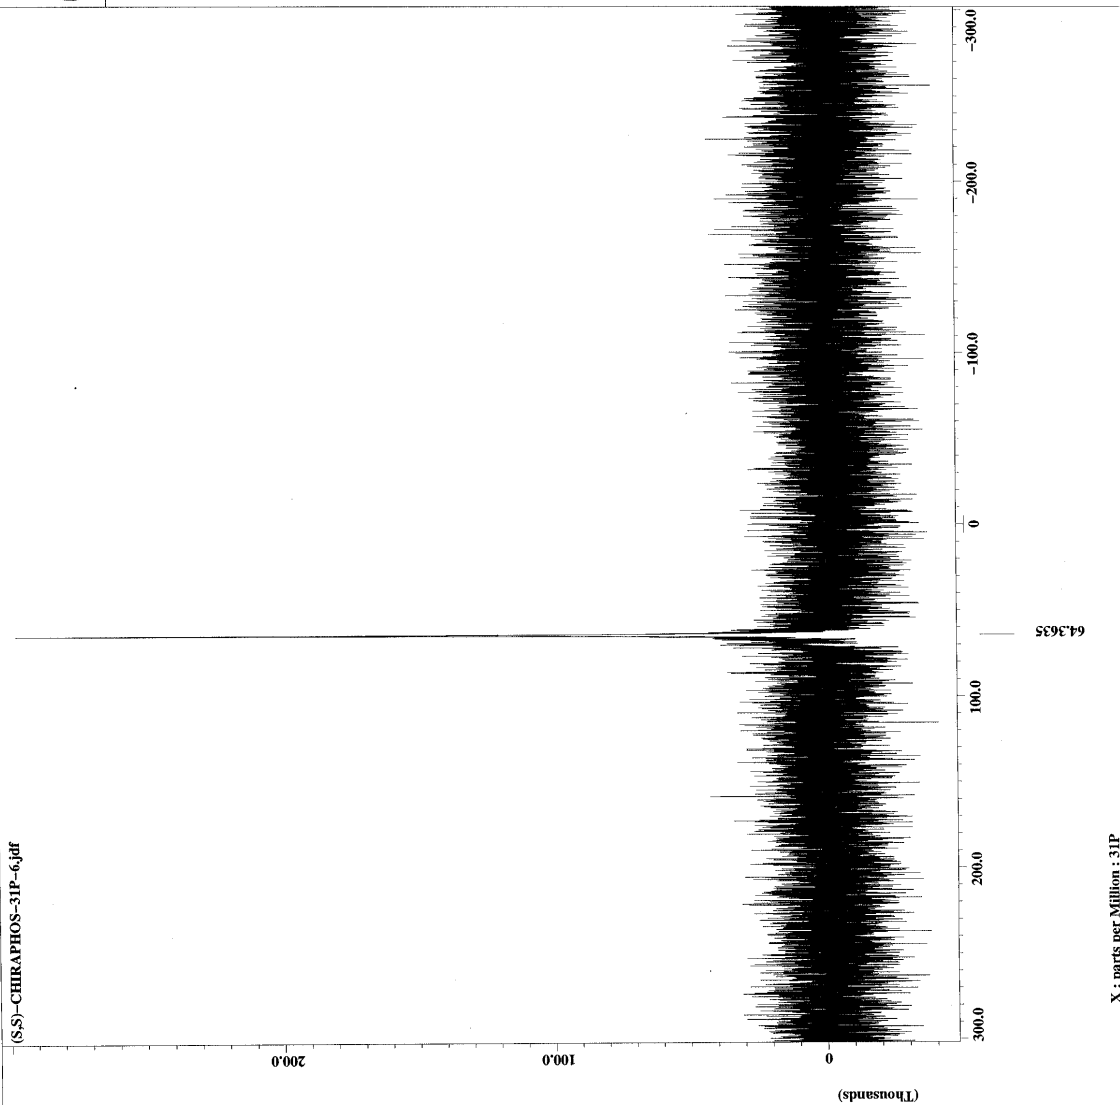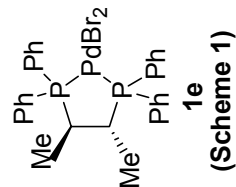

Instituto de Química UNAM (BQO)  
 Dr. A. Cabrera / Laura R. P.  
 Clave: Reacc340  
 No. Registro: 1094  
 Disolvente: CDCl<sub>3</sub>  
 Experimento: 1H  
 Velocidad: 300 MHz (C)  
 25-Marzo-2008

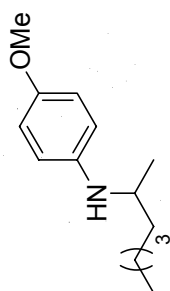

4a  
 (Table 1)

Pulse Sequence: s2pu1

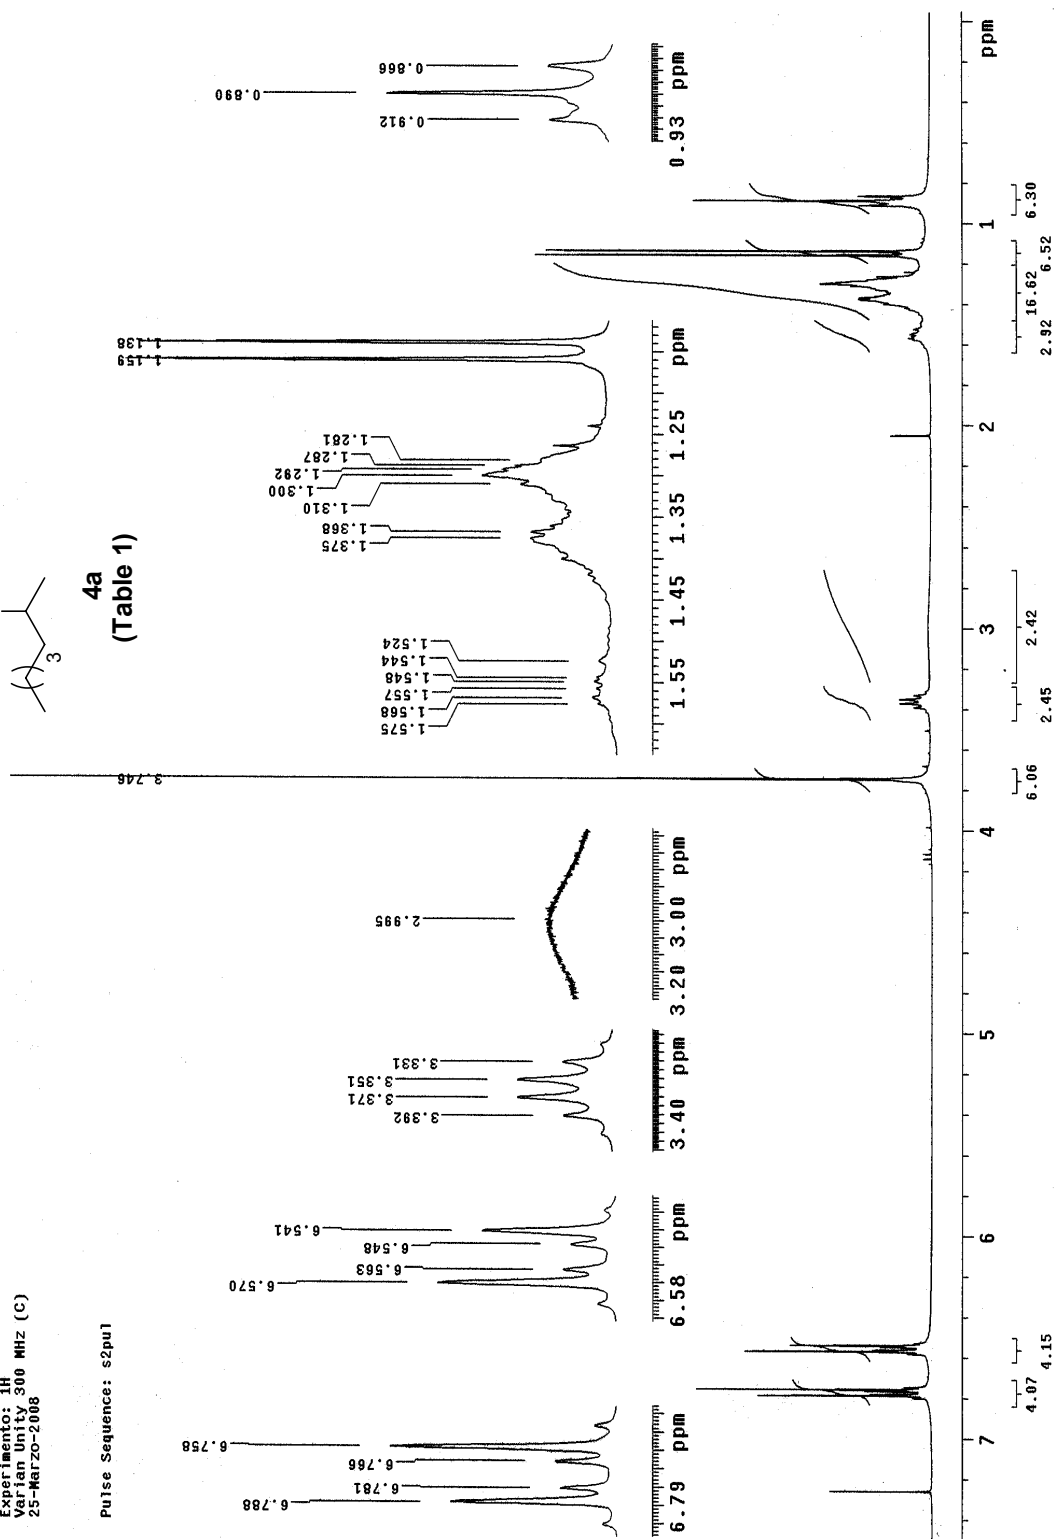

Instituto de Química UNAM (BQI)  
 Dr. A. Cabrera / Laura R. P.  
 Clave: Reacc340 / 1094  
 No. Registro: 1094  
 Disolvente: CDCl<sub>3</sub>  
 Experimento: 13C  
 Varian Unity 75 MHz (C)  
 25-Marzo-2008

Pulse Sequence: s2pu1

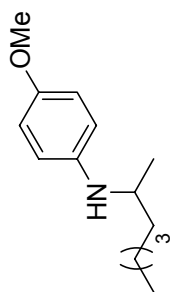

**4a**  
(Table 1)

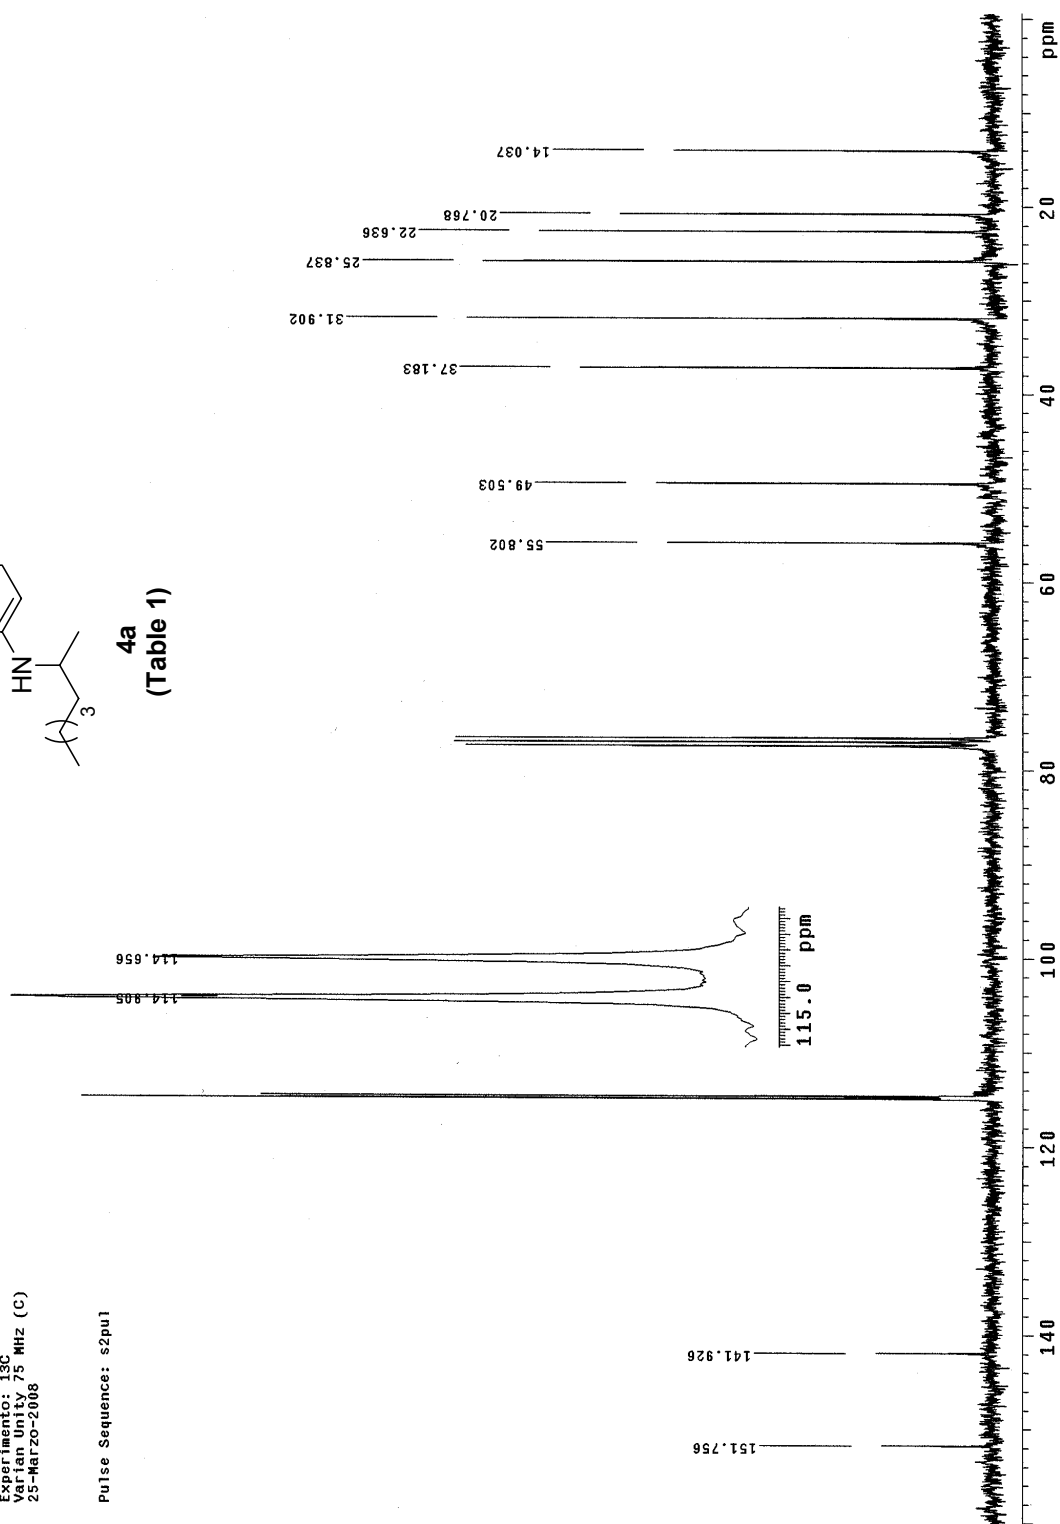

Reacc340  
080616-coa-01

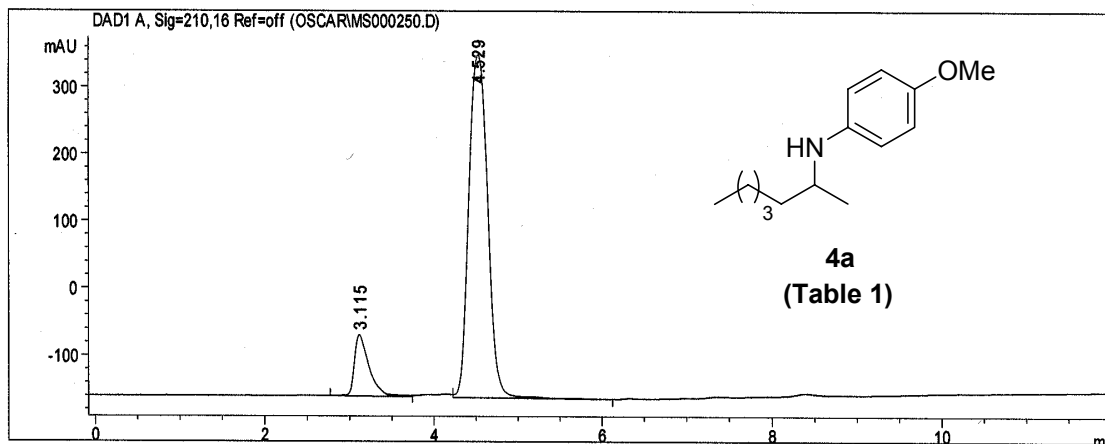

Data File C:\HPCHEM\1\DATA\OSCAR\MS000250.D Sample Name: Reacc340  
HPLC IQ 19/06/08 10:23:33 AM carmen  
Chiralcel OD 25x 4.6 mm  
hexano/isopropanol 95/5  
flujo 1 ml/min  
UV 210

Injection Date : 18/06/08 3:48:25 PM  
Sample Name : Reacc340 Vial : 1  
Acq. Operator : carmen  
Acq. Method : C:\HPCHEM\1\METHODS\QUIRAL.M  
Last changed : 18/06/08 3:38:29 PM by carmen  
(modified after loading)  
Analysis Method : C:\HPCHEM\1\METHODS\QUIRAL.M  
Last changed : 19/06/08 10:08:54 AM by carmen  
(modified after loading)

#### Area Percent Report

Sorted By : Signal  
Multiplier : 1.0000  
Dilution : 1.0000

Signal 1: DAD1 A, Sig=210,16 Ref=off  
Results obtained with enhanced integrator!

| Peak #   | RetTime [min] | Type | Width [min] | Area [mAU*s] | Height [mAU] | Area %  |
|----------|---------------|------|-------------|--------------|--------------|---------|
| 1        | 3.115         | BV   | 0.1834      | 1095.69629   | 91.72173     | 12.0154 |
| 2        | 4.529         | VP   | 0.2551      | 8023.39697   | 511.09534    | 87.9846 |
| Totals : |               |      |             | 9119.09326   | 602.81706    |         |

% co = 75.96

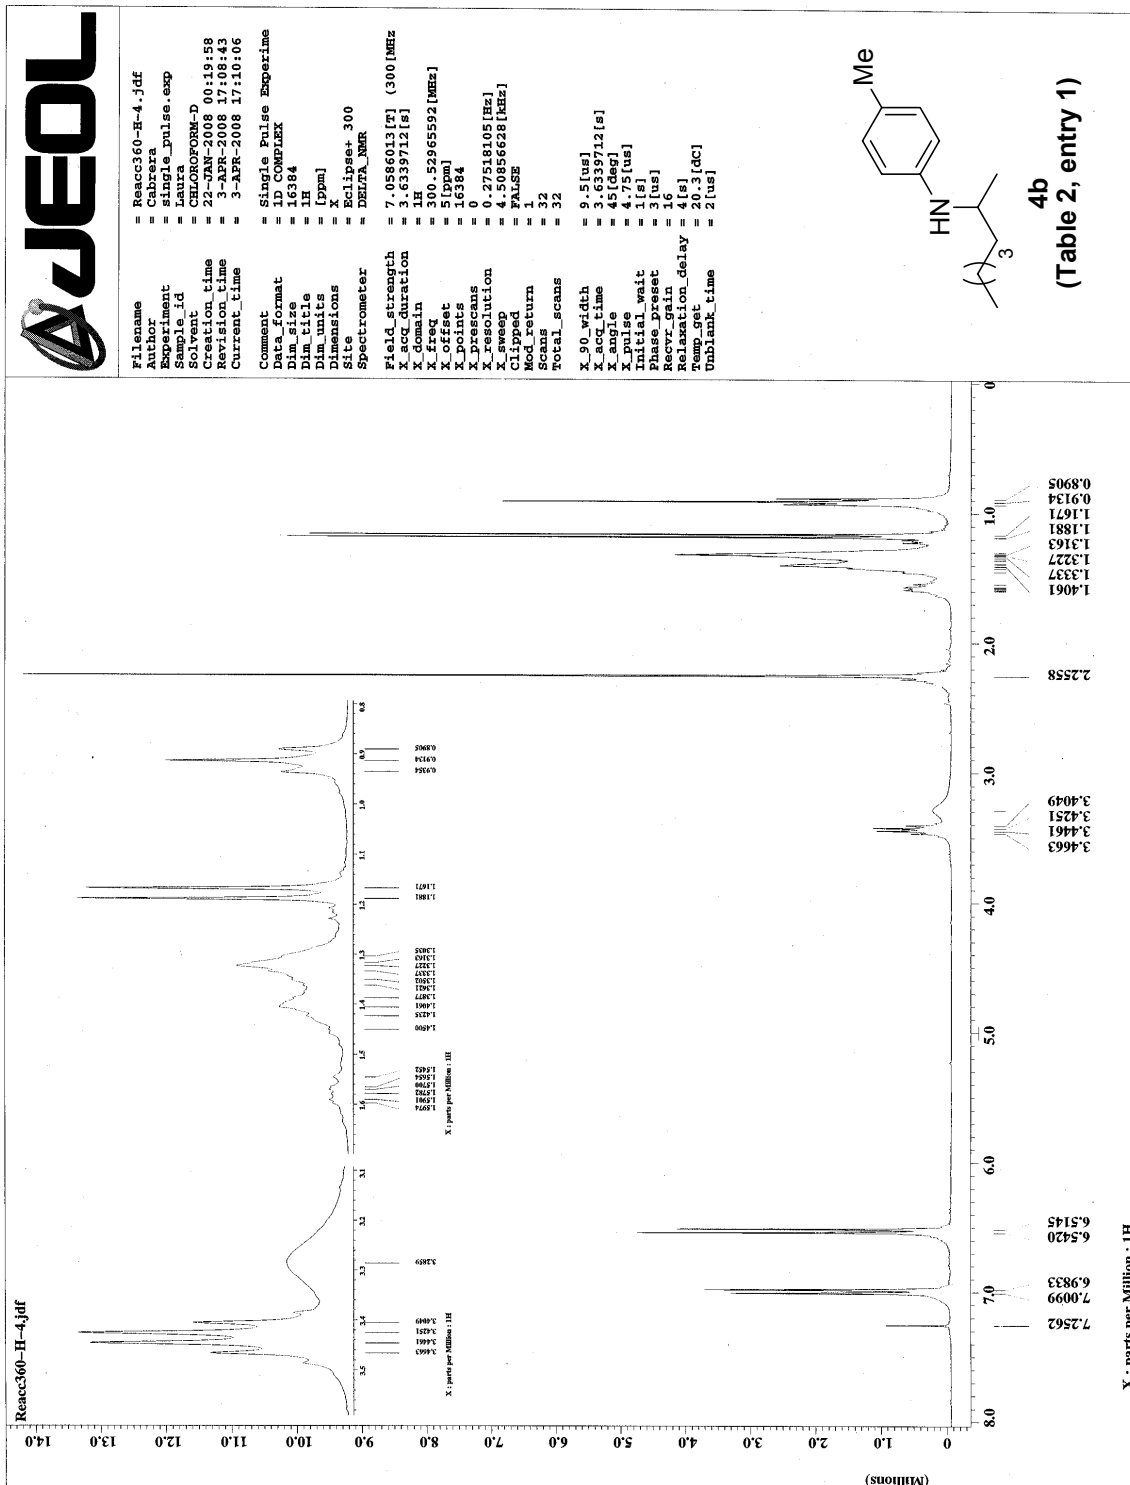

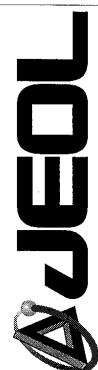

Filename = Reacc360-1C-2.jdf  
Author = Cabrera  
Experiment = single\_pulse\_dec  
Sample\_id = laura  
Solvent = CHLOROFORM-D  
Creation\_time = 22-JAN-2008 00:39:54  
Revision\_time = 3-APR-2008 17:23:50  
Current\_time = 3-APR-2008 17:24:24  
Comment = Single Pulse with Bro  
Data\_format = 1D COMPLEX  
Dim\_size = 32768  
Dim\_title = 13C  
Dim\_units = [ppm]  
Dimensions = X  
Site = Eclipse+ 300  
Spectrometer = JEOL-300  
Field\_strength = 7.0586013[T] (300 [MHz]  
X\_acq\_duration = 1.7334272[s]  
X\_domain = 13C  
X\_freq = 75.56823426[MHz]  
X\_offset = 32768  
X\_points = 32768  
X\_presets = 0  
X\_resolution = 0.57689184[Hz]  
X\_sweep = 18.90359168[kHz]  
Irr\_domain = 1H  
Irr\_freq = 300.52965592[MHz]  
Irr\_offset = 5[ppm]  
Clipped = FALSE  
Mod\_return = 1  
Scans = 411  
Total\_scans = 411  
X\_90\_width = 11.3[us]  
X\_acq\_time = 1.7334272[s]  
X\_angle = 30[deg]  
X\_pulse = 3.7666667[us]  
Initial\_wait = 1[s]  
Phase\_preset = 3[us]  
Relaxation\_delay = 1[s]  
Temp\_get = 21.8[dc]  
Unblank\_time = 2[us]

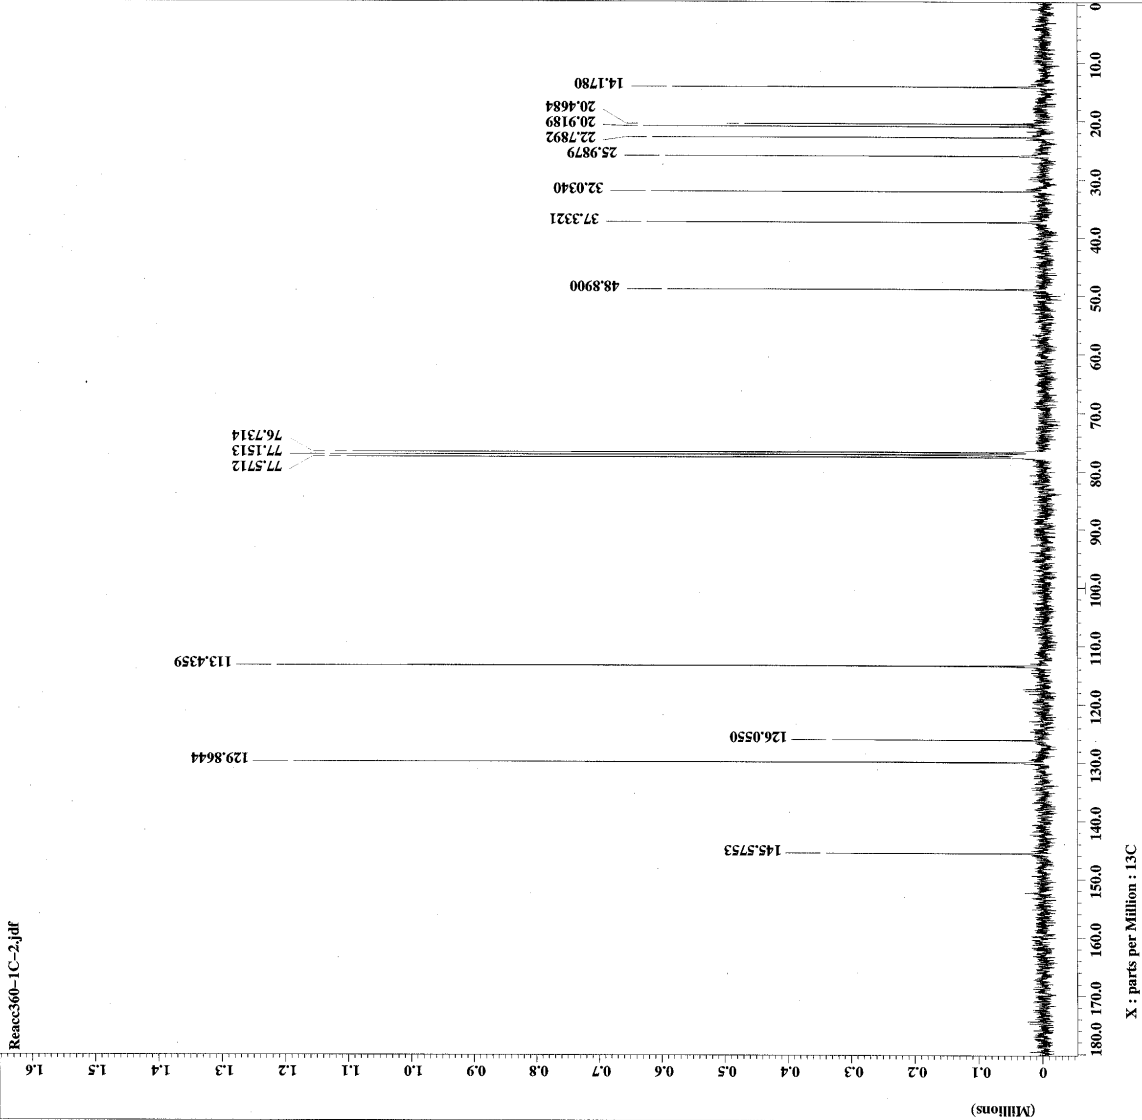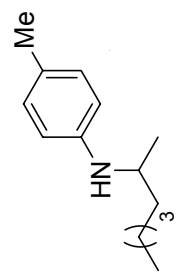

4b  
(Table 2, entry 1)

X : parts per Million : 13C

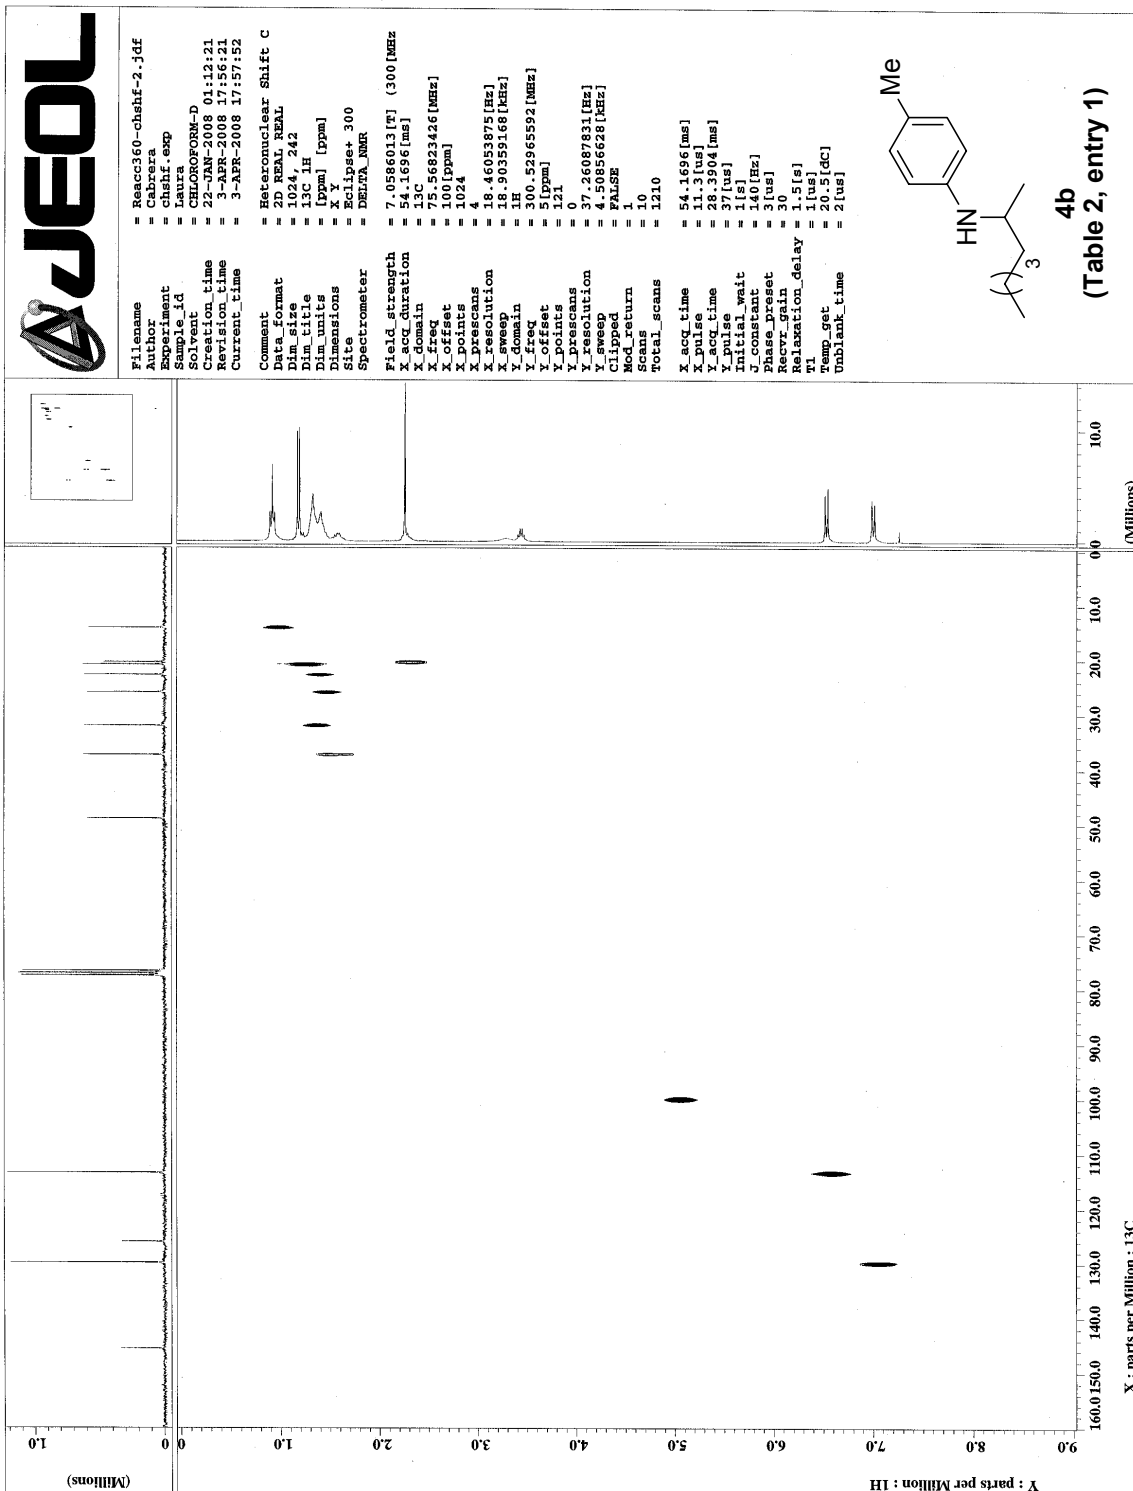

Reacc390  
080619-coa-02

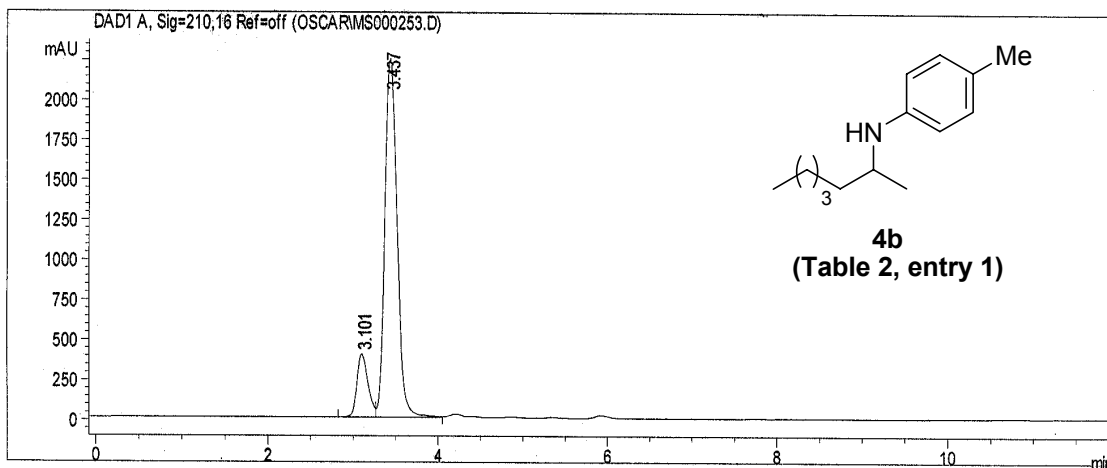

Data File C:\HPCHEM\1\DATA\OSCAR\MS000253.D Sample Name: Reacc390  
HPLC IQ 20/06/08 12:10:17 PM carmen  
Chiralcel OD 25x 4.6 mm  
hexano/isopropanol 92/8  
flujo 1 ml/min  
UV 210

=====  
Injection Date : 20/06/08 11:10:51 AM  
Sample Name : Reacc390 Vial : 1  
Acq. Operator : carmen  
Method : C:\HPCHEM\1\METHODS\QUIRAL.M  
Last changed : 20/06/08 9:08:55 AM by carmen  
(modified after loading)

=====  
Area Percent Report  
=====

Sorted By : Signal  
Multiplier : 1.0000  
Dilution : 1.0000

Signal 1: DAD1 A, Sig=210,16 Ref=off  
Results obtained with enhanced integrator!

| Peak #   | RetTime [min] | Type | Width [min] | Area [mAU*s] | Height [mAU] | Area %  |
|----------|---------------|------|-------------|--------------|--------------|---------|
| 1        | 3.101         | BV   | 0.1371      | 3566.70728   | 395.91531    | 13.6440 |
| 2        | 3.437         | VV   | 0.1612      | 2.25745e4    | 2246.77417   | 86.3560 |
| Totals : |               |      |             | 2.61412e4    | 2642.68948   |         |

cc = 72.71%

|                |                             |
|----------------|-----------------------------|
| Filename       | = Raacc409Pi820-1H-9_jd     |
| Author         | = Cabrera                   |
| Experiment     | = single_pulse.exp          |
| Sample_id      | = Laura                     |
| Solvent        | = CHLOROFORM-D              |
| Creation time  | = 16-MAR-2008 14:08:53      |
| Revision time  | = 2-SEP-2008 17:20:49       |
| Current time   | = 2-SEP-2008 07:12:11       |
| Comment        | =                           |
| Data_format    | = 1D Pulse Sequence         |
| Dim size       | = 16384                     |
| Dim title      | = 1H                        |
| Dim units      | = ppm                       |
| Dimensions     | = X                         |
| Site           | = ECLIPSE+ 300              |
| Spectrometer   | = DELTA NMR                 |
| Field strength | = 7.0586813 [T] (300) [MHz] |
| X_acq duration | = 6.539712 [s]              |
| X channel      | = 13                        |
| X freq         | = 300.52965592 [MHz]        |
| X offset       | = 5 [ppm]                   |
| X points       | = 16384                     |
| X prescans     | = 0                         |
| X resolution   | = 0.37518105 [Hz]           |
| X resolution   | = 5.08366208 [Hz]           |
| X clipped      | = FALSE                     |
| Mod return     | = 1                         |
| Scans          | = 32                        |
| Total_scans    | = 32                        |
| X90 width      | = 9.5 [us]                  |
| X acq time     | = 3.6539712 [s]             |
| X angle        | = 45 [deg]                  |
| X pulse        | = 4.75 [us]                 |
| Initial wait   | = 1 [s]                     |
| Phase preset   | = 3 [us]                    |
| Recvr gain     | = 1 [g]                     |
| Temp eq        | = 1 [s]                     |
| Unblank time   | = 16.3 [dc]                 |
|                | = 2 [us]                    |

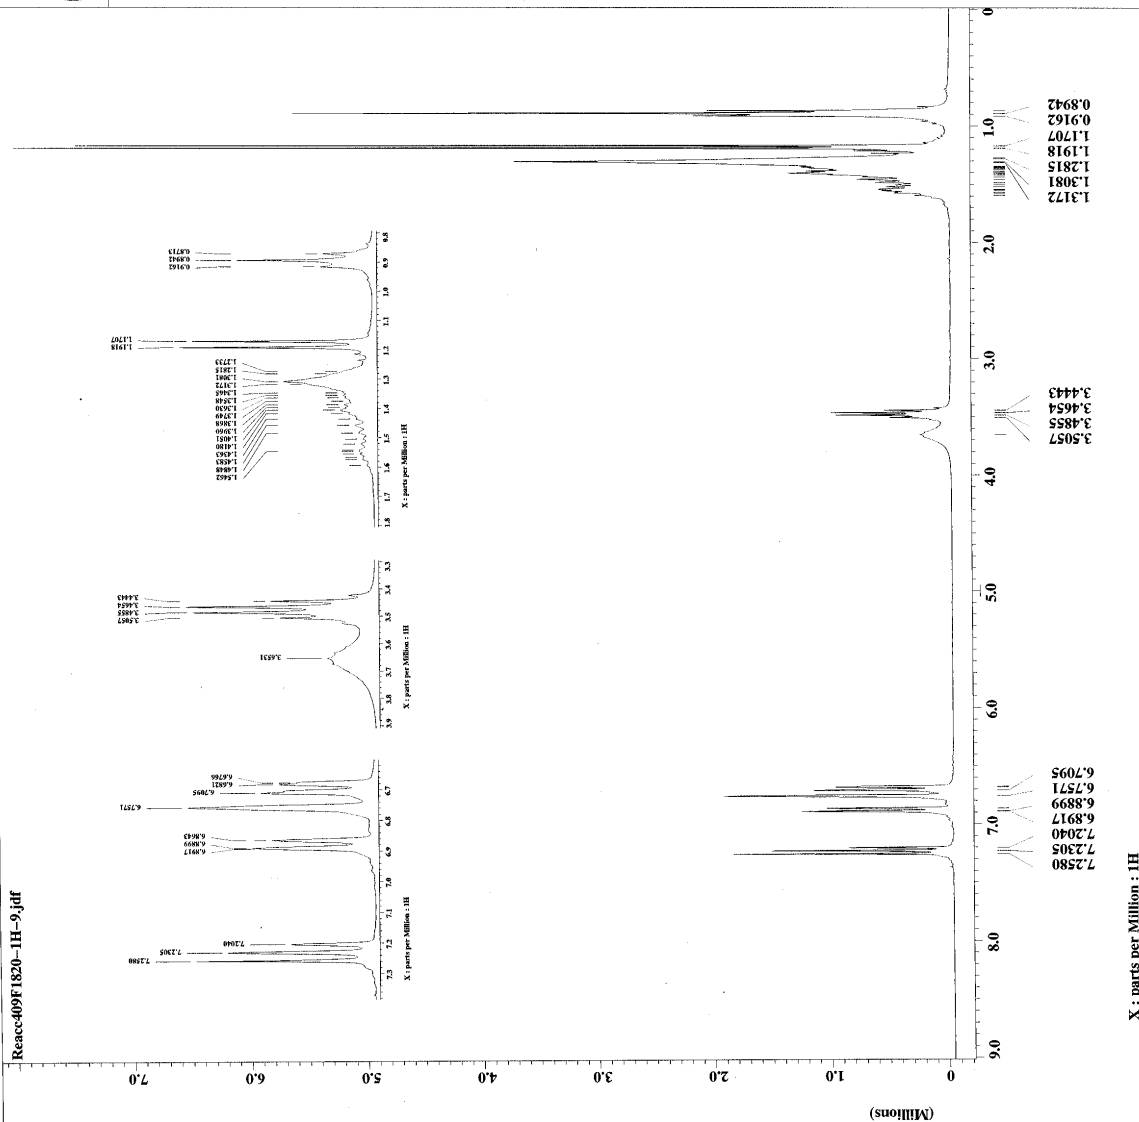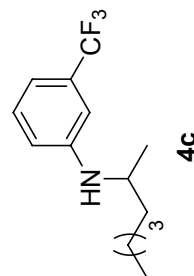

(Table 2, entry 2)

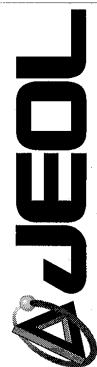

Filename = Reacc40F1820-13C-4.jd  
Author = Cabrera  
Experiment = single\_pulse\_dec  
Sample\_id = laura  
Solvent = CHLOROFORM-D  
Creation time = 16-MAR-2008 15:21:29  
Revision time = 28-MAY-2008 09:09:50  
Current\_time = 28-MAY-2008 09:10:14  
Comment = Single Pulse with Bro  
Data format = ID COMPLEX  
Dim\_size = 32768  
Dim\_title = 13C  
Dim\_units = [ppm]  
Dimensions = X  
Spectrometer = Delta 300  
Spectrometer = DELTA\_NMR  
Field strength = 7.0586013[T] (300[MHz]  
X\_acq\_duration = 1.7334272[s]  
X\_domain = 13C  
X\_freq = 75.56823426[MHz]  
X\_offset = 100[ppm]  
X\_resolution = 29768  
X\_sweeps = 4  
X\_resolution = 0.57689184[Hz]  
X\_sweep = 18.90359168[kHz]  
X\_domain = 1H  
X\_freq = 300.52965592[MHz]  
X\_offset = 50[ppm]  
X\_resolution = 1265  
X\_sweeps = 1265  
Total\_scans = 1265  
X\_90\_width = 11.3[us]  
X\_acq\_time = 1.7334272[s]  
X\_angle = 30[deg]  
X\_resolution = 126566667[us]  
Initial\_wait = 3[us]  
Phase\_preset = 3[us]  
Recvr\_gain = 30  
Relaxation\_delay = 1[s]  
Temp\_get = 18.2[dc]  
Unblank\_time = 2[us]

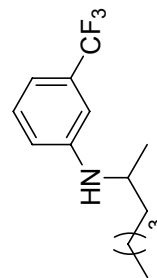

(Table 2, entry 2)

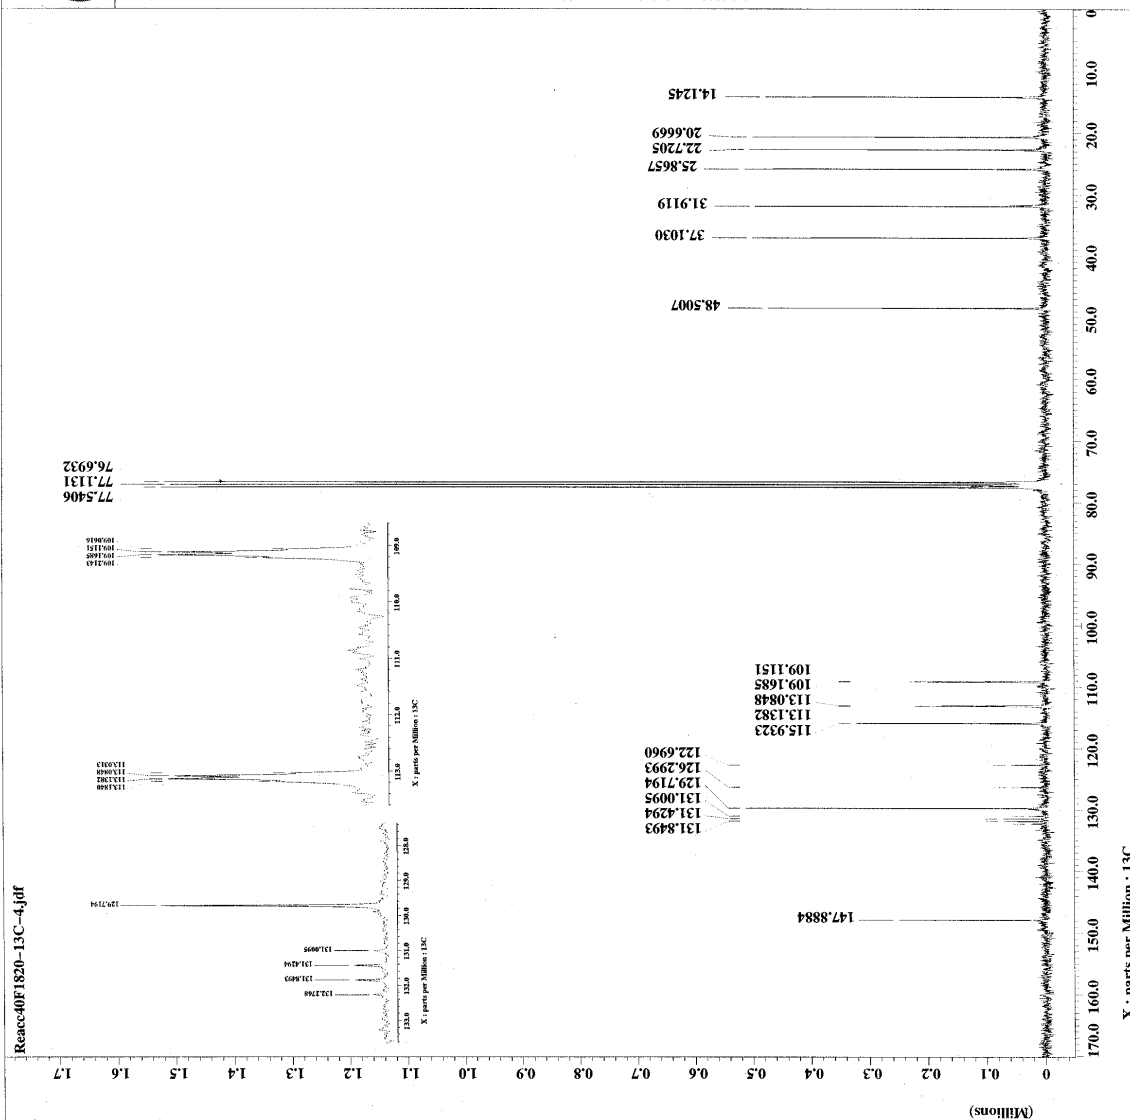

Chiralcel OD 25x 4.6 mm  
 hexano/isopropanol 92/8  
 flujo 1 ml/min  
 UV 210

```
=====
Injection Date   : 20/06/08 4:26:23 PM
Sample Name      : Reacc409
Acq. Operator    : carmen
Acq. Method      : C:\HPCHEM\1\METHODS\QUIRAL.M
Last changed     : 20/06/08 3:40:09 PM by carmen
                  (modified after loading)
Analysis Method  : C:\HPCHEM\1\METHODS\QUIRAL.M
Last changed     : 12/09/08 12:43:24 PM by 428
                  (modified after loading)
para Le legadec
=====
```

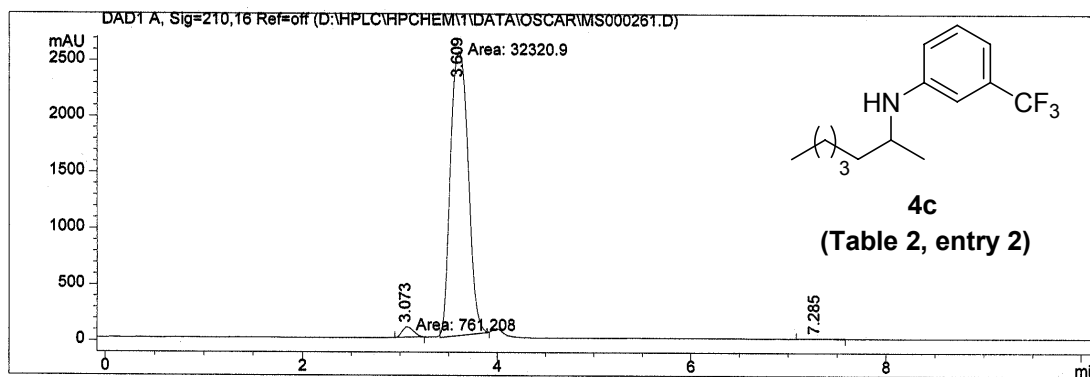

```
=====
Area Percent Report
=====
```

```
Sorted By      : Signal
Multiplier     : 1.0000
Dilution       : 1.0000
```

Signal 1: DAD1 A, Sig=210,16 Ref=off  
 Results obtained with enhanced integrator!

| Peak # | RetTime [min] | Type | Width [min] | Area [mAU*s] | Height [mAU] | Area %  |
|--------|---------------|------|-------------|--------------|--------------|---------|
| 1      | 3.073         | MM   | 0.1349      | 761.20813    | 94.03625     | 2.2999  |
| 2      | 3.609         | MM   | 0.2120      | 3.23209e4    | 2541.08276   | 97.6527 |
| 3      | 7.285         | BP   | 0.1814      | 15.70433     | 1.33349      | 0.0474  |

Totals : 3.30978e4 2636.45250

Instituto de Química UNAM (BQI)  
 Dr. A. Cabrera / Laura R. P.  
 Clave: Reacc391  
 No. Registro: 1096  
 Disolvente: CDCl<sub>3</sub>  
 Experimento: 1H  
 Varian Unity 300 MHz (C)  
 27-Marzo-2008

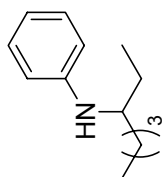

**4d**  
 (Table 2, entry 3)

Pulse Sequence: s2pul

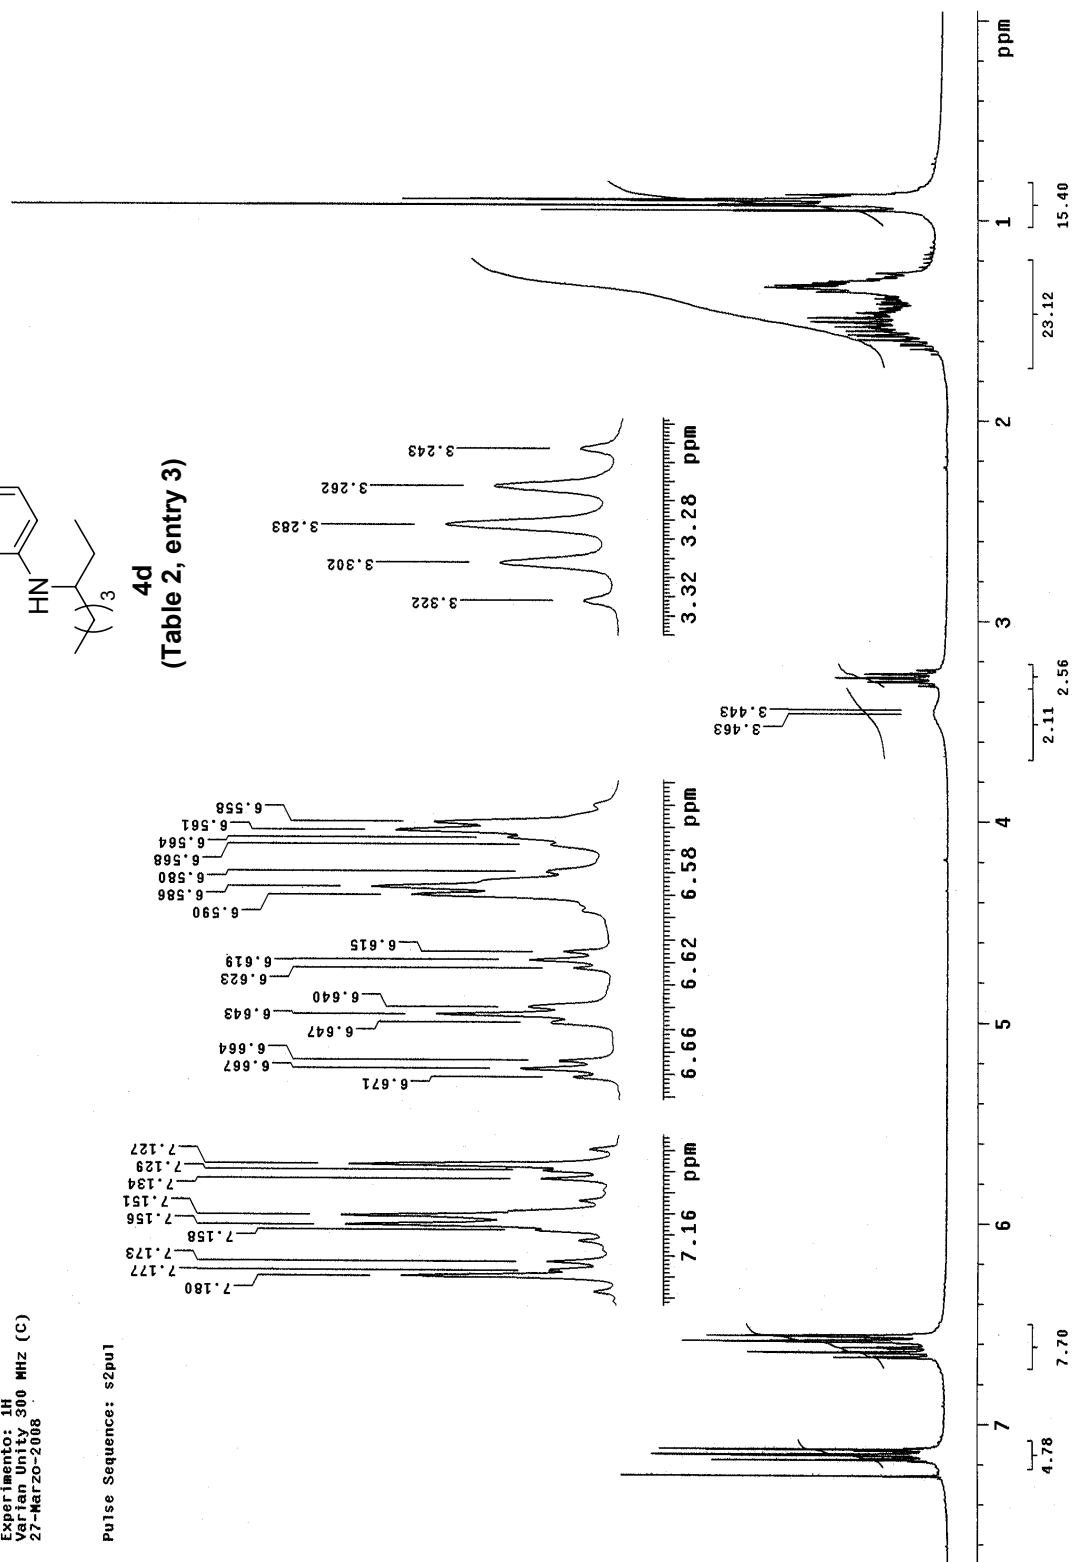

Instituto de Química UNAM (BQ)  
 Dr. A. Cabrera / Laura R. P.  
 Clave: Reacc391  
 No. Registro: 1086  
 Disolvente: CDCl<sub>3</sub>  
 Experimento: 13C  
 Varian Unity 75 MHz (C)  
 27-Marzo-2006

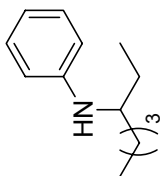

**4d**  
 (Table 2, entry 3)

Pulse Sequence: s2pul1

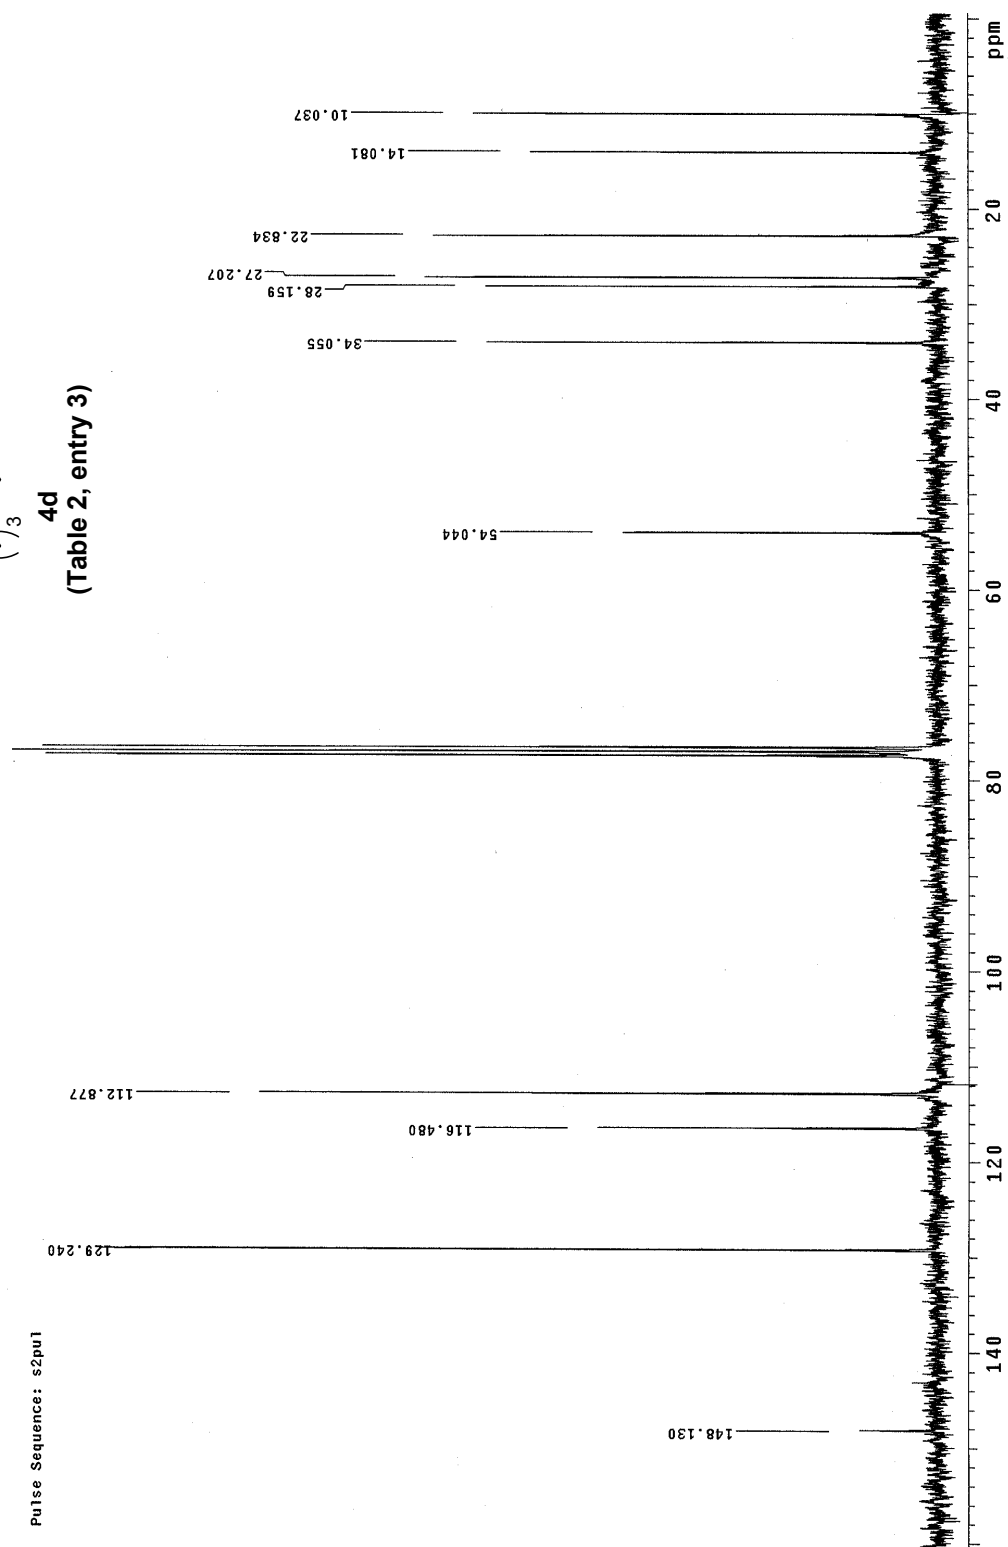

[ TIC ]

Data : Dr-Cabrera-Armando-021  
 Sample: 595 G Reacc 391 JeolAX505HA  
 Note : 5 horas  
 Inlet : GC  
 Ion Species : Normal Ion

Date : 11-Mar-120 15:50

Ion Mode : EI+

TIC Range : m/z 10 to 650

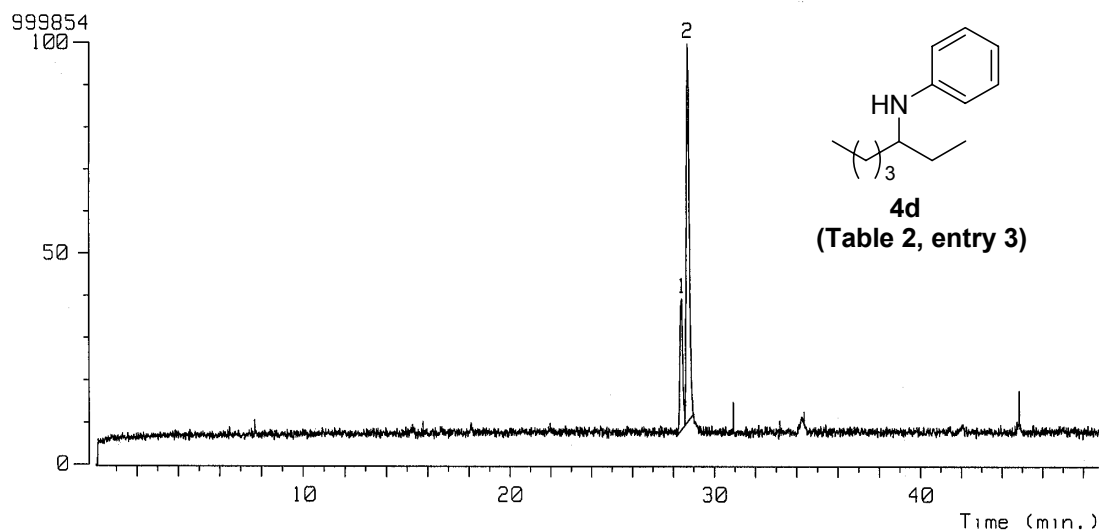

| No. | RT[min] | Area   | Area% | Height | Height% | Width[sec] | INTEG |
|-----|---------|--------|-------|--------|---------|------------|-------|
| 1   | 28.42   | 280.66 | 25.22 | 29.44  | 25.64   | 8.95       | BV    |
| 2   | 28.73   | 831.97 | 74.78 | 85.35  | 74.36   | 9.15       | VB    |

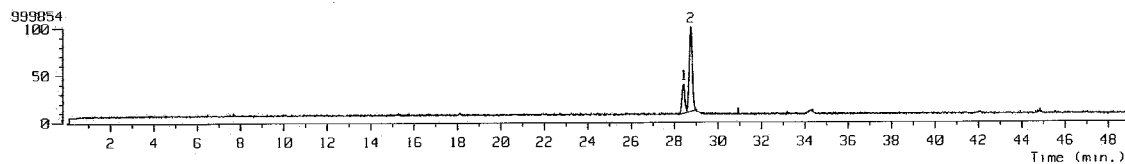

[ Mass Spectrum ]  
 RT : 28.42 min Scan# : 2207-2186-2250 Temp : 0.0 deg.C  
 Ion Mode : EI+ Int. : 8.74

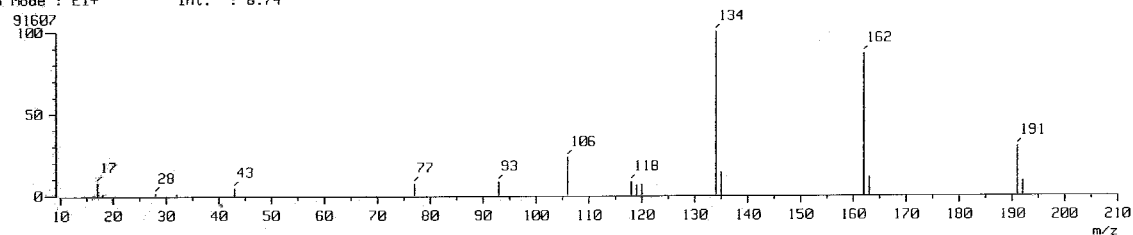

[ Mass Spectrum ]  
 RT : 28.73 min Scan# : 2231-2186-2250 Temp : 0.0 deg.C  
 Ion Mode : EI+ Int. : 28.64

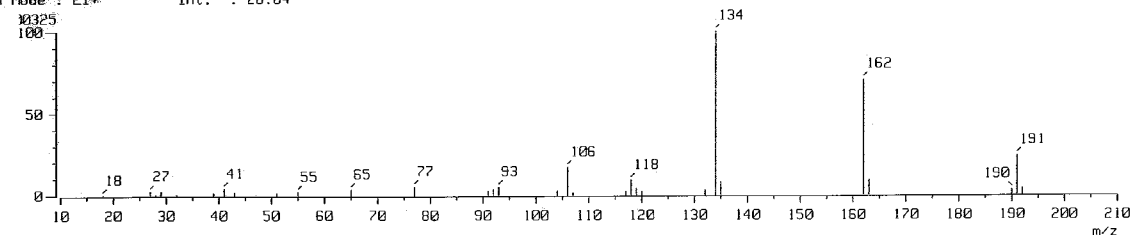

Instituto de Química UNAM NZ  
 Dr. A. Cabrera/Laura R.  
 Clave: Reacc365  
 Q0013  
 Bruker Avance 300MHz-F  
 1H  
 No. registro: 635  
 19-02-08

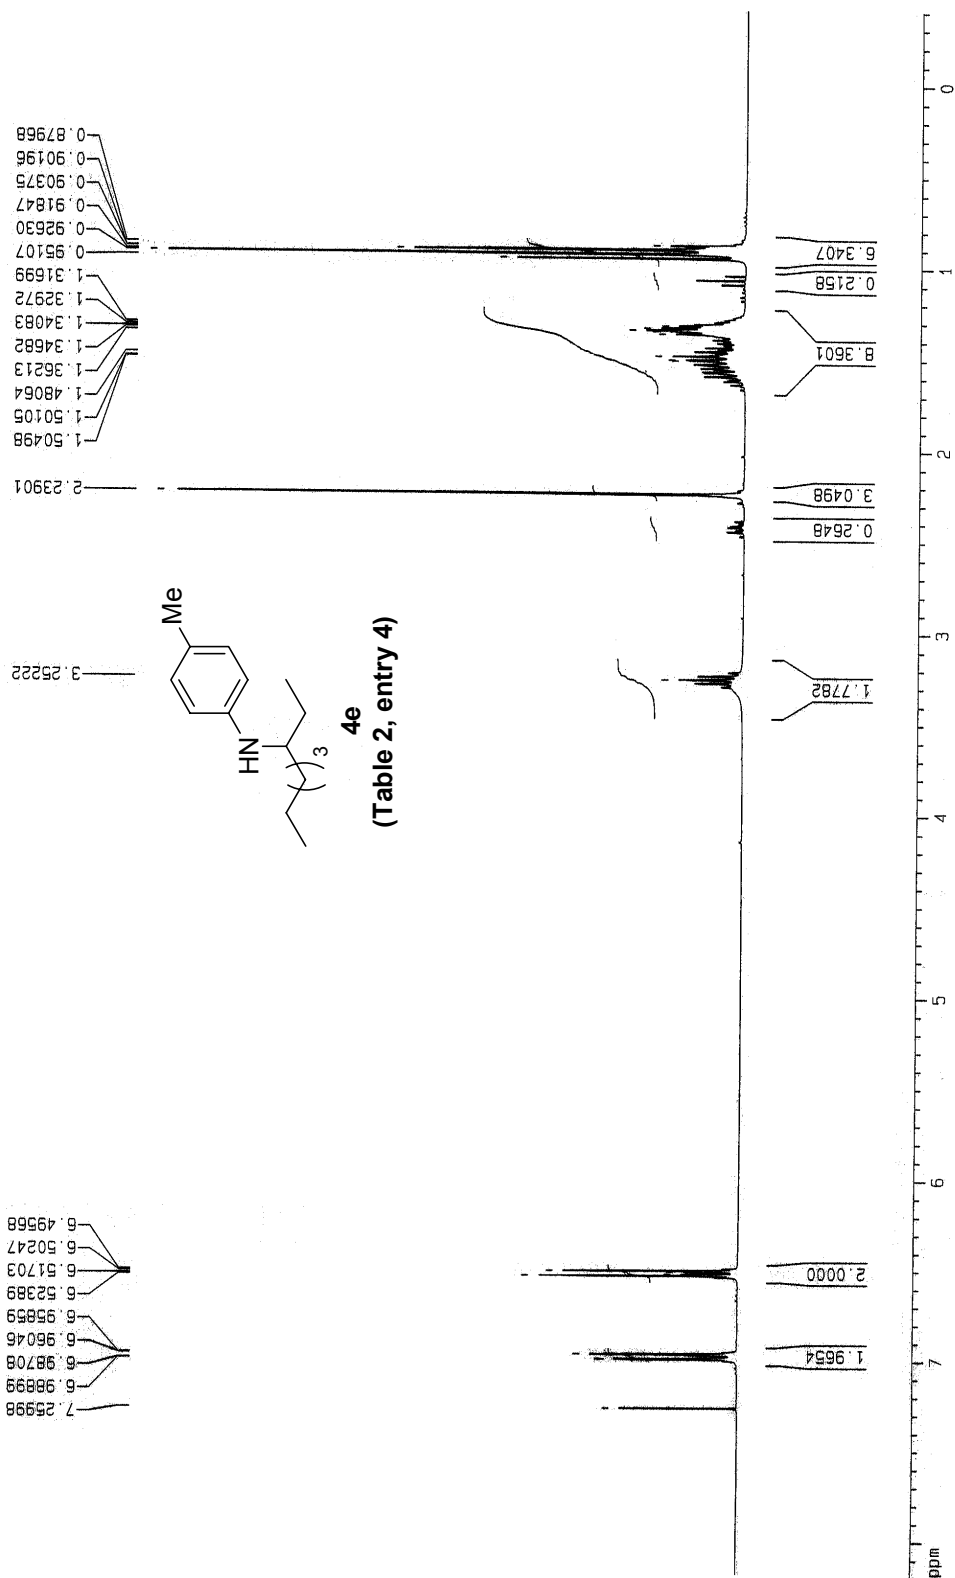

Instituto de Química UNAM IZ  
 Dr. A. Cabrera/Laura R.  
 Clave: Reacc365  
 C0C13  
 Bruker-Avance 300MHz-F  
 13C  
 No. registro: 635  
 19-02-08

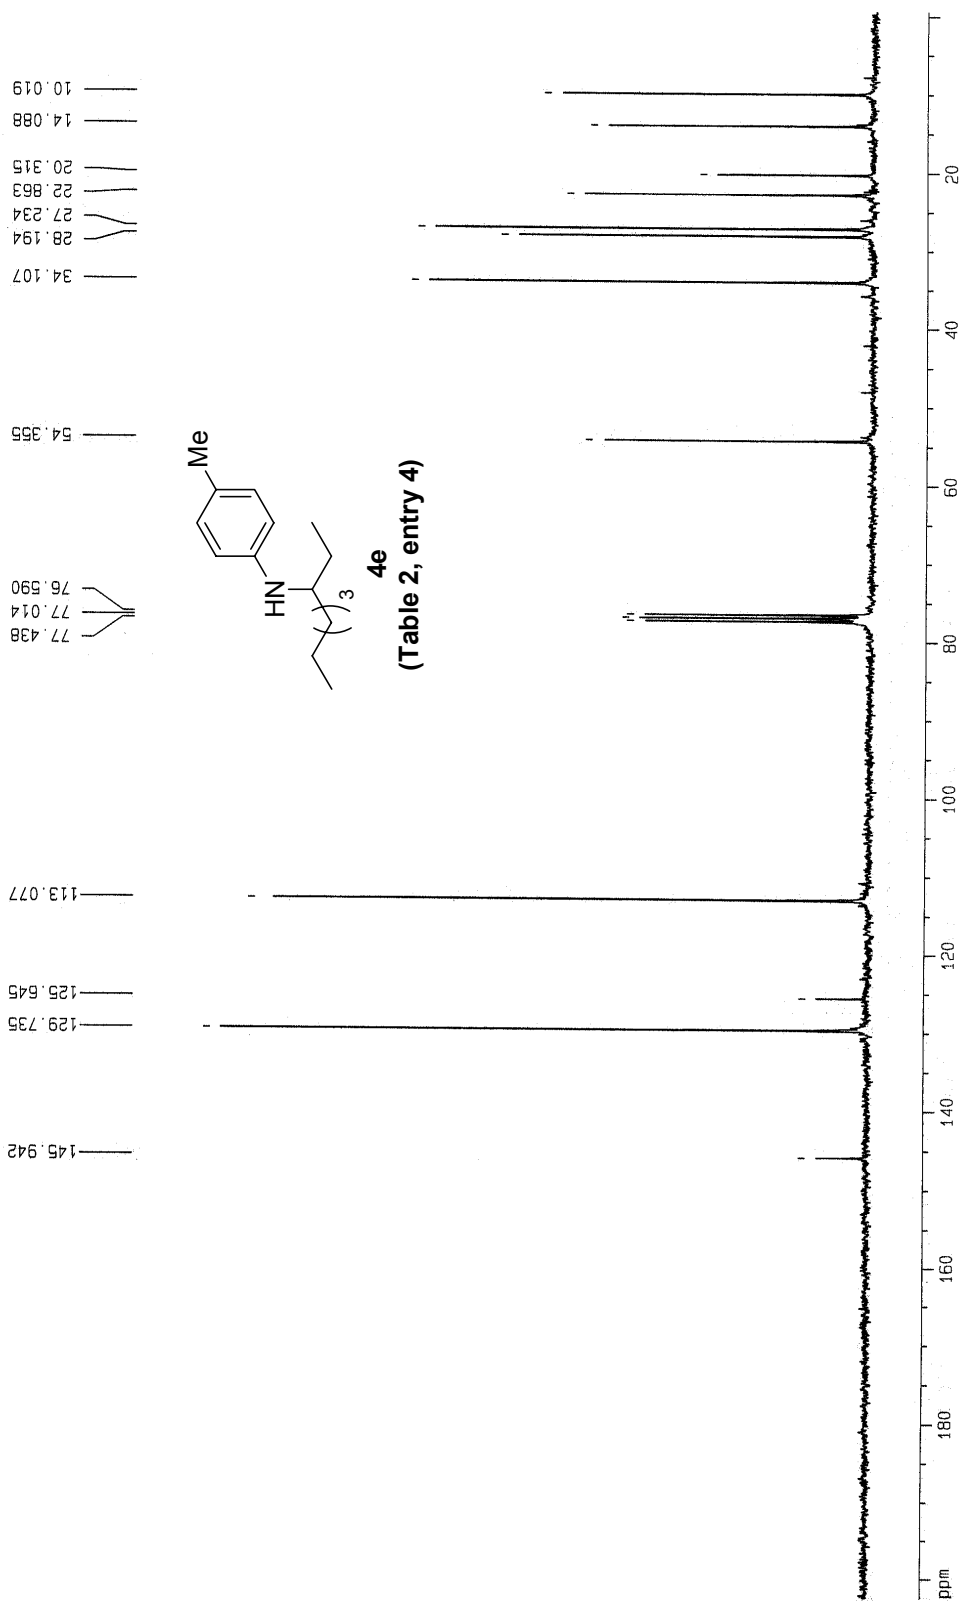

Reacc365  
080619-coa-06

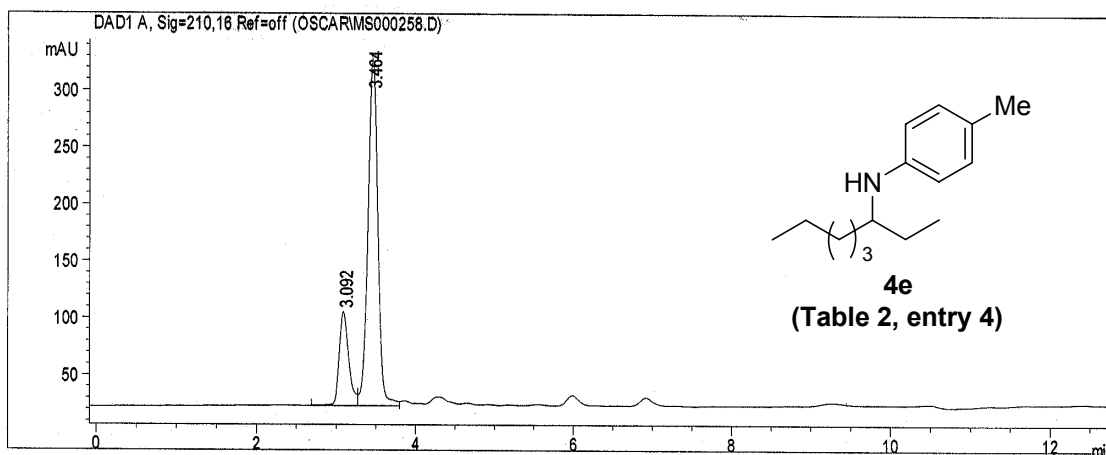

Data File C:\HPCHEM\1\DATA\OSCAR\MS000258.D Sample Name: Reacc365  
HPLC IQ 20/06/08 2:44:03 PM carmen  
Chiralcel OD 25x 4.6 mm  
hexano/isopropanol 92/8  
flujo 1 ml/min  
UV 210

=====

Injection Date : 20/06/08 12:21:49 PM  
Sample Name : Reacc365 Vial : 1  
Acq. Operator : carmen  
Acq. Method : C:\HPCHEM\1\METHODS\QUIRAL.M  
Last changed : 20/06/08 9:08:55 AM by carmen  
(modified after loading)  
Analysis Method : C:\HPCHEM\1\METHODS\QUIRAL.M  
Last changed : 20/06/08 12:36:04 PM by carmen  
(modified after loading)

para Le legadec

=====  
Area Percent Report  
=====

Sorted By : Signal  
Multiplier : 1.0000  
Dilution : 1.0000

Signal 1: DAD1 A, Sig=210,16 Ref=off  
Results obtained with enhanced integrator!

| Peak #   | RetTime [min] | Type | Width [min] | Area [mAU*s] | Height [mAU] | Area %  |
|----------|---------------|------|-------------|--------------|--------------|---------|
| 1        | 3.092         | BV   | 0.1243      | 682.65735    | 82.69392     | 20.4483 |
| 2        | 3.464         | VV   | 0.1375      | 2655.80273   | 305.39322    | 79.5517 |
| Totals : |               |      |             | 3338.46008   | 388.08714    |         |

cc = 59.10%

Reacc404-1H-4.jdf

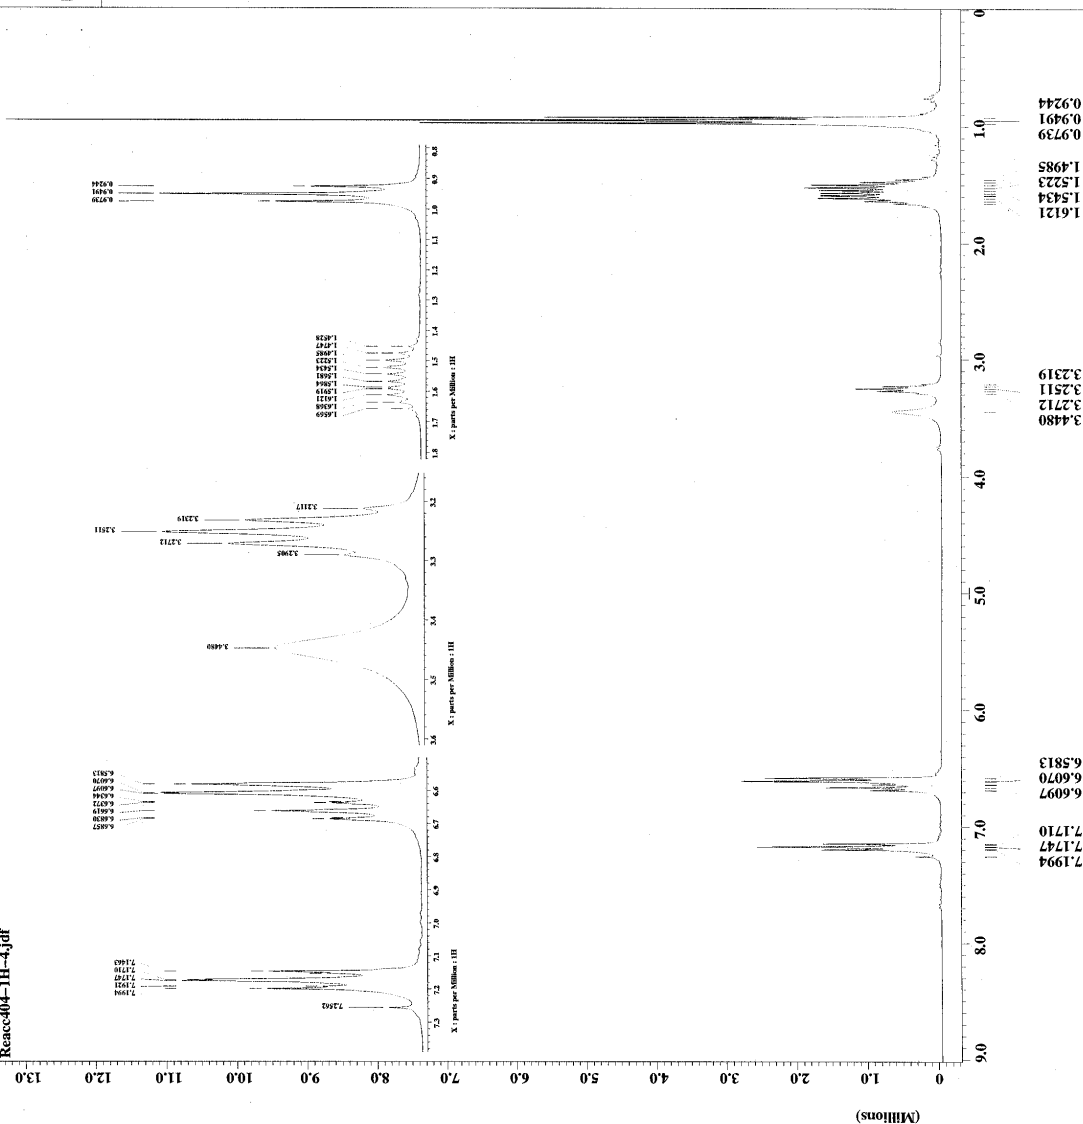

X : parts per Million : 1H

Filename = Reacc404-1H-4.jdf  
 Author = Cabrera  
 Experiment = single\_pulse.exp  
 Sample\_id = Laura  
 Solvent = CHLOROFORM-D  
 Creation\_time = 26-FEB-2008 13:33:15  
 Revision\_time = 5-MAY-2008 07:48:27  
 Current\_time = 5-MAY-2008 07:49:02  
 Comment = Single Pulse Experiment  
 Data\_format = 1D COMPLEX  
 Data\_size = 16384  
 Data\_title = 1H  
 Data\_units = [ppm]  
 Dimensions = X  
 Size = 300  
 Spectrometer = DELTA\_NMR  
 Field\_strength = 7.0586013[T] (300[MHz]  
 X\_acq\_duration = 3.6339712[s]  
 X\_domain = 1H  
 X\_freq = 300.52965592[MHz]  
 X\_offset = 5[ppm]  
 X\_points = 16384  
 X\_resolution = 0.27518105[Hz]  
 X\_sweep = 4.50856628[MHz]  
 Clipped = FALSE  
 Mod\_return = 1  
 Scans = 32  
 Total\_scans = 32  
 X\_90\_width = 9.5[us]  
 X\_acq\_time = 3.6339712[s]  
 X\_angle = 45[deg]  
 X\_pulse = 4.75[us]  
 Initial\_wait = 1[s]  
 Phase\_preset = 3[us]  
 Recv\_gain = 16  
 Relaxation\_delay = 1.7[sec]  
 Delay = 1.7[sec]  
 Unblank\_time = 2[us]

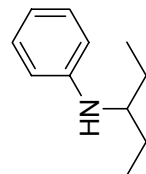

**4f**  
(Table 2, entry 5)

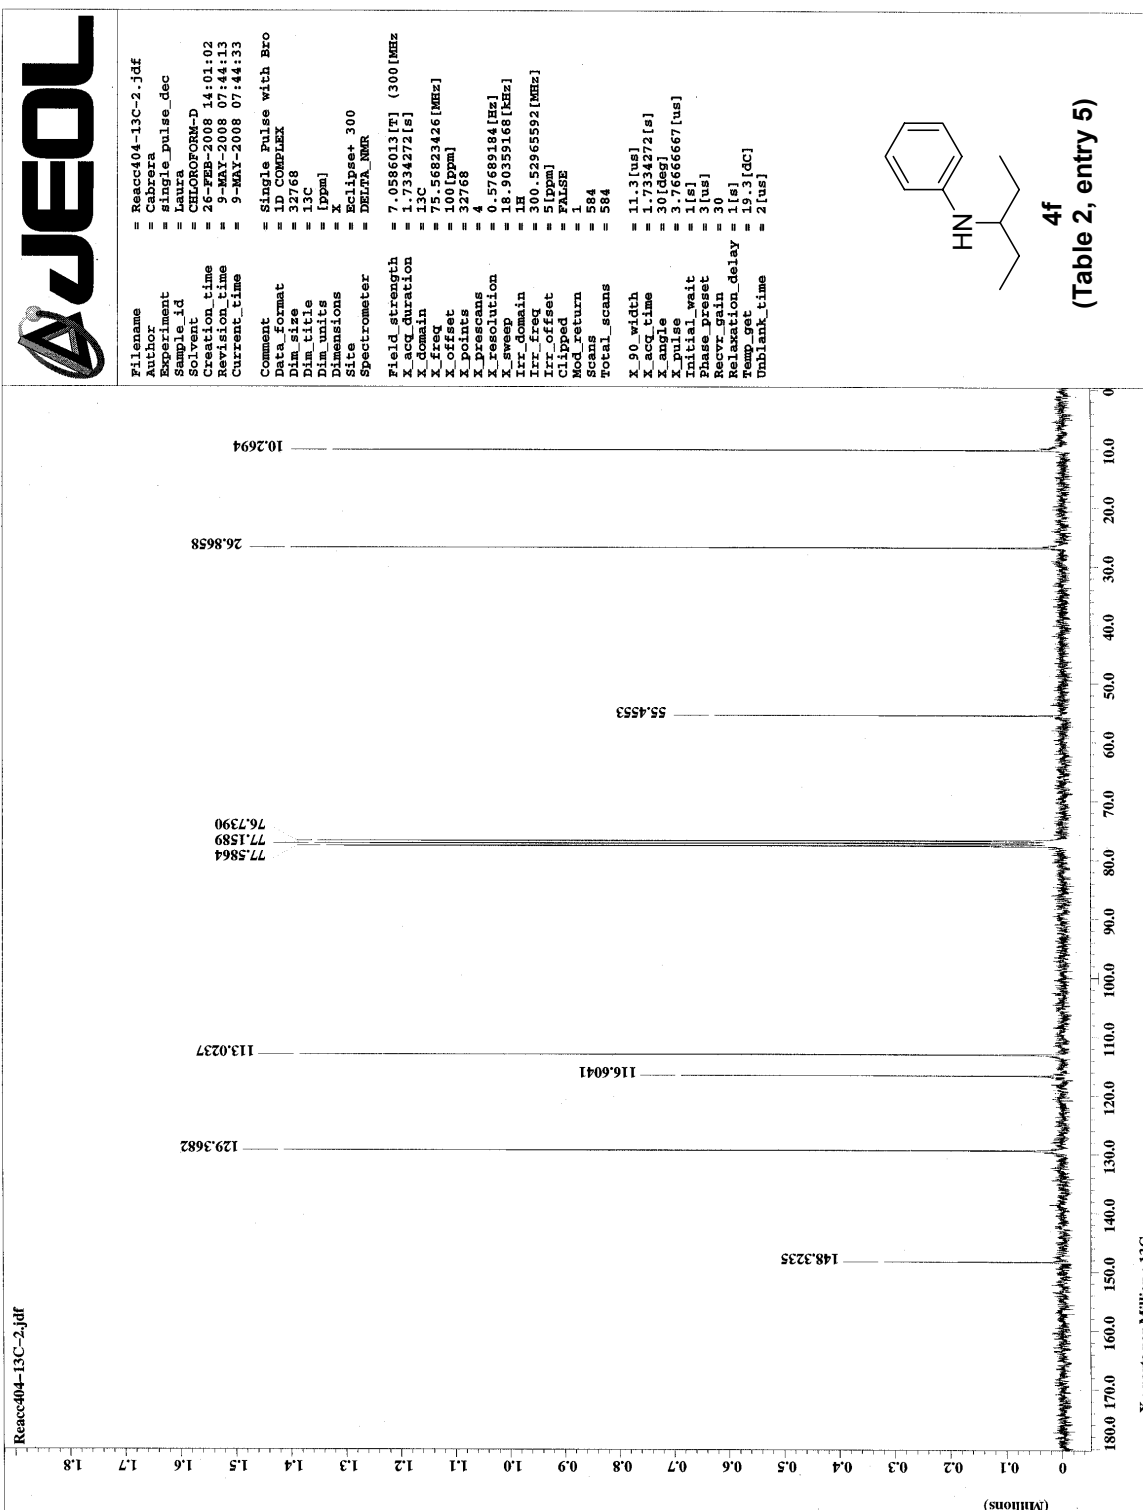

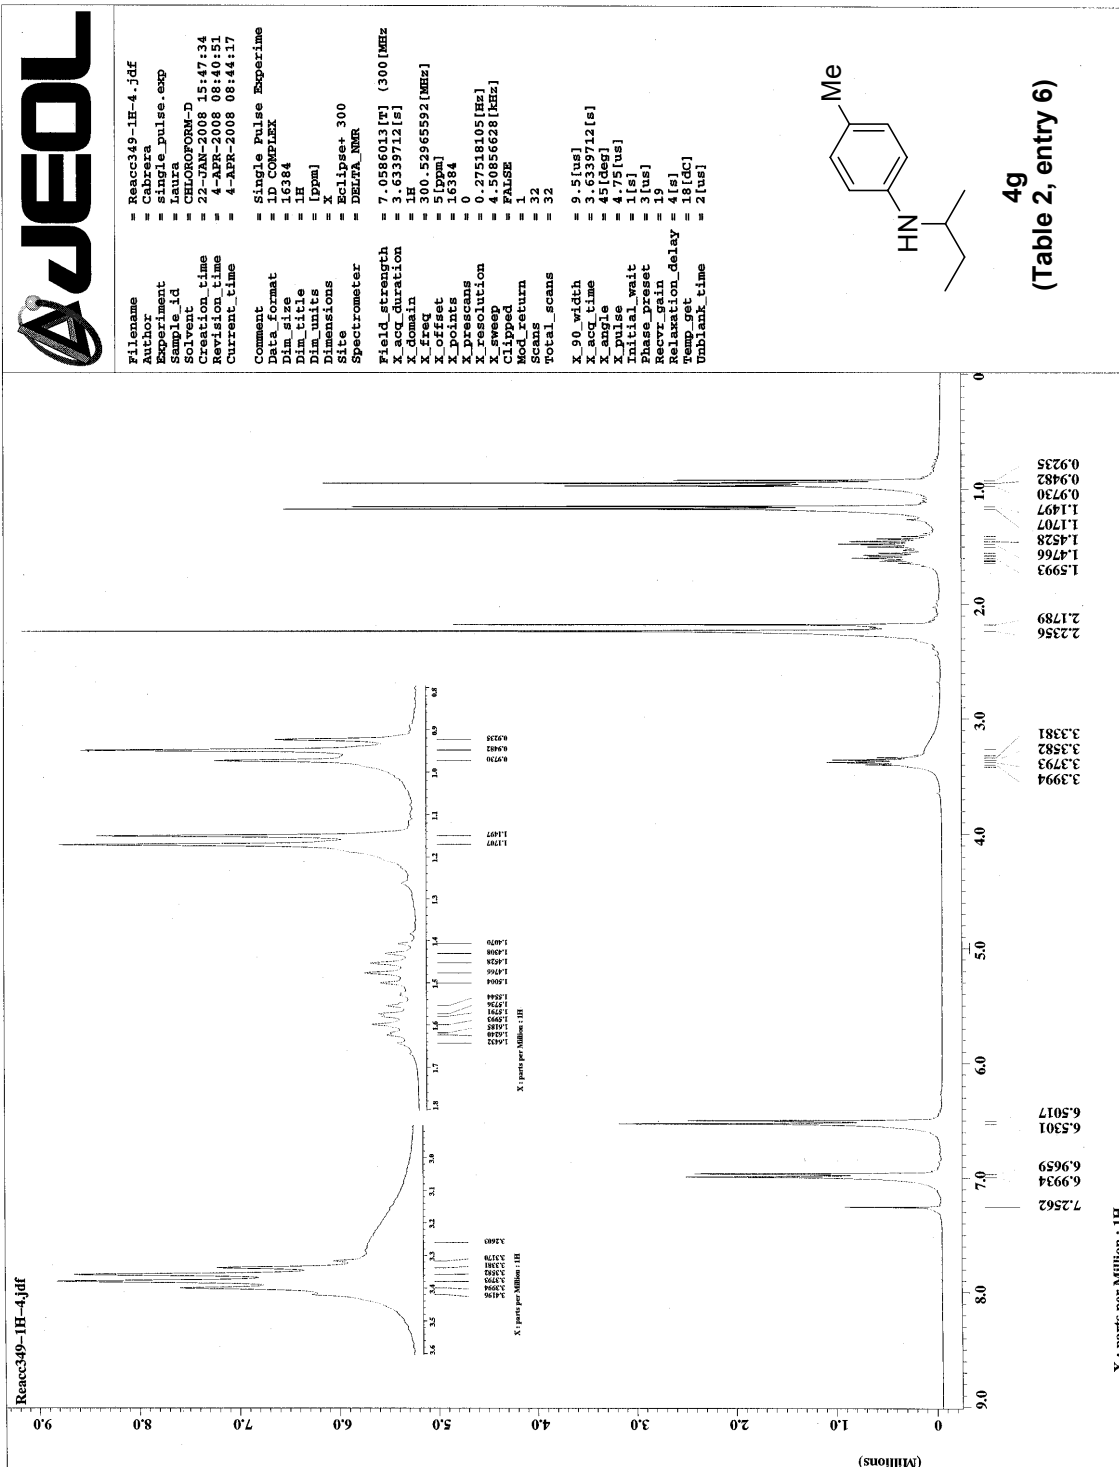

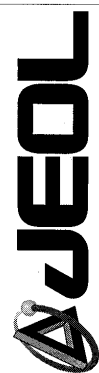

Reacc349-1C-3.jdf

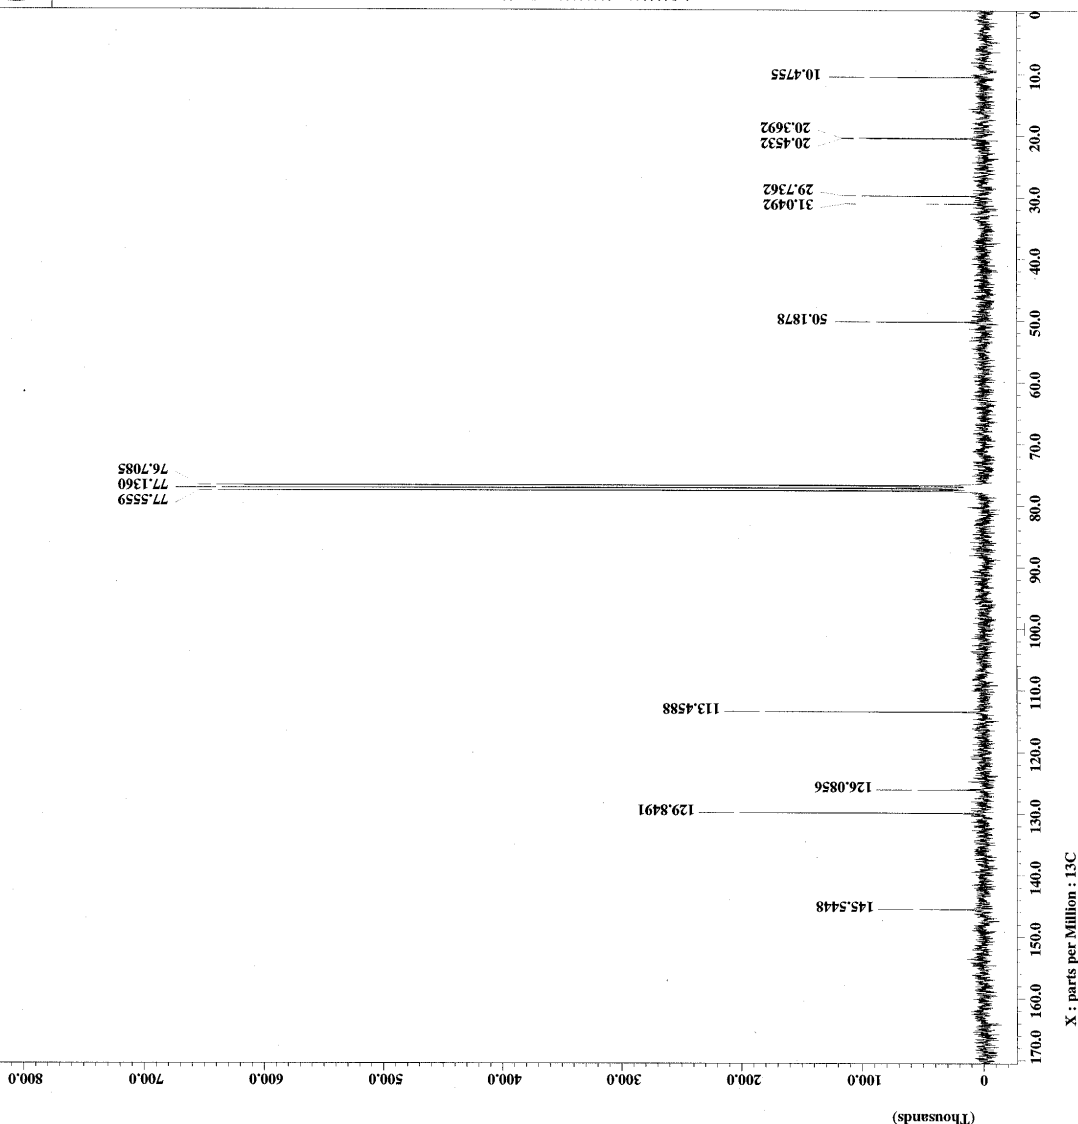

Filename = Reacc349-1C-3.jdf  
Author = Cabrera  
Experiment = single\_pulse\_dec  
Sample\_id = CHNFORM-D  
Creation\_time = 22-JAN-2008 17:03:17  
Revision\_time = 4-APR-2008 09:47:27  
Current\_time = 4-APR-2008 09:47:41  
Comment = Single Pulse with Bro  
Data\_format = 1D COMPLEX  
Dim\_size = 32768  
Dim\_title = 13C  
Dimensions = 1[ppm]  
Site = X  
Spectrometer = Eclipse+ 300  
Field\_strength = 7.0586013[T] (300 MHz)  
X\_acq\_duration = 1.7334272[s]  
X\_domain = 1563  
X\_offset = 75.56823426[MHz]  
X\_points = 100[ppm]  
X\_prescans = 32768  
X\_resolution = 4  
X\_sweep = 0.57689184[Hz]  
X\_domain = 18.90359168[MHz]  
X\_freq = 500.52965592[MHz]  
X\_phase = 5[ppm]  
X\_offset = FALSE  
Mod\_return = 1  
Scans = 1563  
Total\_scans = 1563  
X\_90\_width = 11.3[us]  
X\_acq\_time = 1.7334272[s]  
X\_offset = 30[ppm]  
X\_phase = 3.76666667[us]  
Initial\_wait = 1[s]  
Phase\_preset = 3[us]  
Recvr\_gain = 30  
Relaxation\_delay = 1[s]  
Temp\_get = 20[dc]  
Unblank\_time = 2[us]

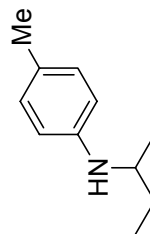

4g  
(Table 2, entry 6)

Reacc349 rac  
080617-coa07

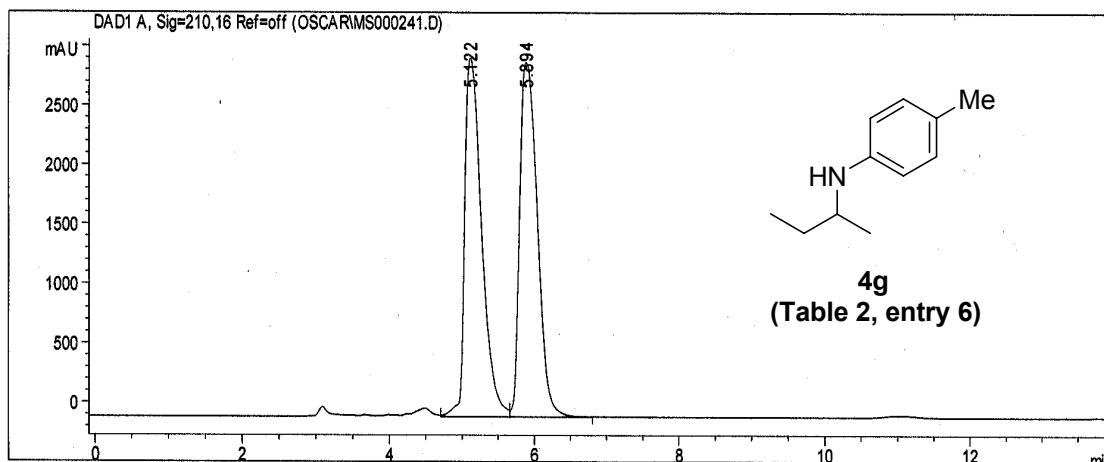

Data File C:\HPCHEM\1\DATA\OSCAR\MS000241.D Sample Name: Reacc331rac  
HPLC IQ 09/09/08 5:50:01 PM carmen  
Chiralcel OD 25x 4.6 mm  
hexano/isopropanol 95/5  
flujo 1 ml/min  
UV 254

=====  
Injection Date : 09/09/08 12:24:12 PM  
Sample Name : Reacc349rac Vial : 1  
Acq. Operator : carmen  
Acq. Method : C:\HPCHEM\1\METHODS\QUIRAL.M  
Last changed : 10/09/08 9:44:12 AM by carmen  
(modified after loading)  
Analysis Method : C:\HPCHEM\1\METHODS\QUIRAL.M  
Last changed : 10/09/08 9:02:34 AM by carmen  
(modified after loading)  
=====

=====  
Area Percent Report  
=====

Sorted By : Signal  
Multiplier : 1.0000  
Dilution : 1.0000

Signal 1: DAD1 A, Sig=210,16 Ref=off  
Results obtained with enhanced integrator!

| Peak #   | RetTime [min] | Type | Width [min] | Area [mAU*s] | Height [mAU] | Area %  |
|----------|---------------|------|-------------|--------------|--------------|---------|
| 1        | 5.122         | VV   | 0.2500      | 4.91991e4    | 3021.12646   | 49.2589 |
| 2        | 5.894         | VV   | 0.2743      | 5.06794e4    | 2981.29468   | 50.7411 |
| Totals : |               |      |             | 9.98785e4    | 6002.42114   |         |

Data File C:\HPCHEM\1\DATA\MS000421.D  
080825-coa-07

Sample Name: Reacc 431F24  
Reacc349

Chiralcel OD 100 5 250x 4.6 mm  
hexano/isopropanol 95/5  
flujo 1 ml/min  
UV 254 nm

=====  
Injection Date : 11/09/08 12:13:20 PM  
Sample Name : Reacc349 Vial : 1  
Acq. Operator : 428  
Acq. Method : C:\HPCHEM\1\METHODS\QUIRAL.M  
Last changed : 11/09/08 11:09:31 AM by carmen  
(modified after loading)  
Analysis Method : C:\HPCHEM\1\METHODS\QUIRAL.M  
Last changed : 08/09/08 7:24:29 PM by carmen  
para Le legadec  
=====

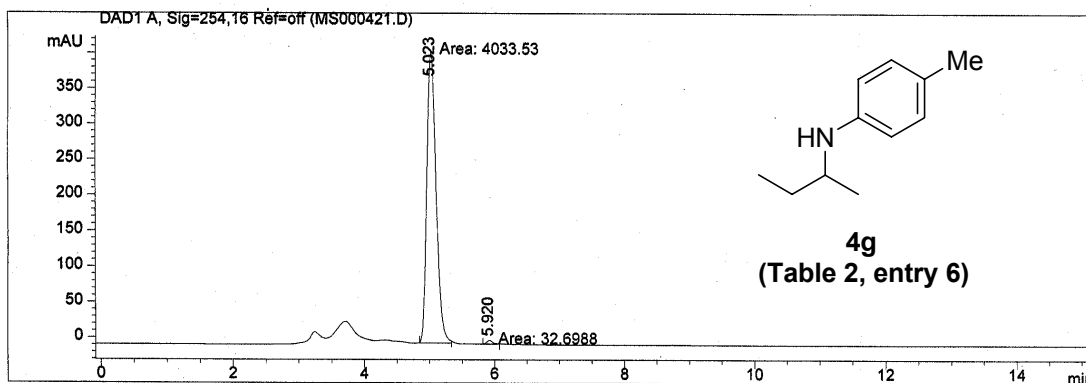

=====  
Area Percent Report  
=====

Sorted By : Signal  
Multiplier : 1.0000  
Dilution : 1.0000

Signal 1: DAD1 A, Sig=254,16 Ref=off  
Results obtained with enhanced integrator!

| Peak # | RetTime [min] | Type | Width [min] | Area [mAU*s] | Height [mAU] | Area %  |
|--------|---------------|------|-------------|--------------|--------------|---------|
| 1      | 5.023         | MM   | 0.1634      | 4033.52783   | 411.43063    | 99.1958 |
| 2      | 5.920         | MM   | 0.1086      | 32.69881     | 5.01843      | 0.8042  |

Totals : 4066.22664 416.44907

=====  
\*\*\* End of Report \*\*\*  
=====

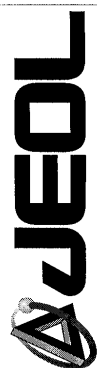

Reacc429F22-1H-8.jdf

```

Filename = Reacc429F22-1H-8.jdf
Author   = Cabrera
Experiment = single_pulse.exp
Sample_id = Laura
Solvent   = CHLOROFORM-D
Creation_time = 31-MAY-2008 00:09:51
Revision_time = 1-SEP-2008 14:26:17
Current_time = 1-SEP-2008 14:27:53

Comment = Single Pulse Experiment
Data_format = 1D COMPLEX
Dim_size = 16384
Dim_title = 1H
Dim_units = [PPM]
Dimensions = X
Site = X
Spectrometer = DELTA 300
Spectrum = DELTA_NMR

Field_strength = 7.0586013[T] (300 MHz)
X_acq_duration = 3.6339712[s]
X_domain = 1H
X_freq = 300.52965592[MHz]
X_offset = 5[ppm]
X_points = 16384
X_resolution = 0
X_sweep = 0.27518105[Hz]
X_resolution = 4.50856628[kHz]
Clipped = FALSE
Mod_return = 1
Scans = 32
Total_scans = 32
X_90_width = 9.5[us]
X_acq_time = 3.6339712[s]
X_angle = 45[deg]
X_pulse = 4.75[us]
Initial_wait = 1[s]
Phase_preset = 3[us]
Recvr_gain = 16
Relaxation_delay = 18.9[dc]
X_offset = 18.9[dc]
Unblank_time = 2[us]
  
```

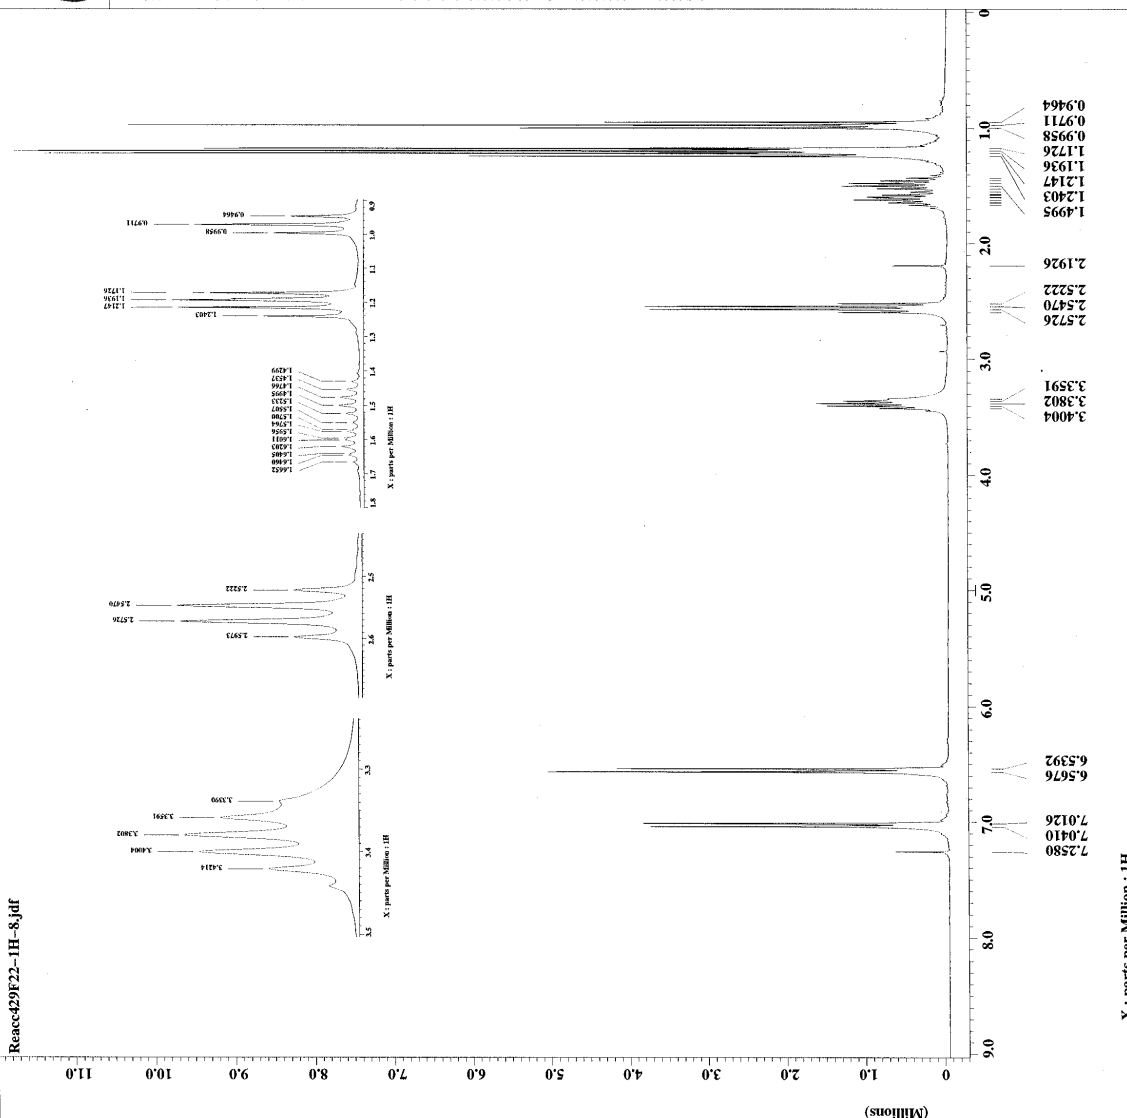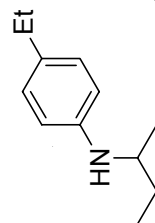

4h  
(Table 2, entry 7)

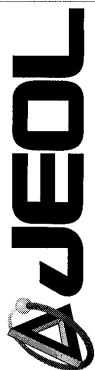

Filename = Reacc429F22-13C-15.jdf  
 Author = Cabrera  
 Experiment = Single\_pulse\_dec  
 Sample = 13C  
 Solvent = CHLOROFORM-D  
 Creation\_time = 31-MAY-2008 01:14:54  
 Revision\_time = 1-SEP-2008 13:08:59  
 Current\_time = 1-SEP-2008 13:09:15  
 Comment = Single Pulse with Bro  
 Data\_format = 1D COMPLEX  
 Dim\_size = 32768  
 Dim\_units = [ppm]  
 Dimensions = X  
 Site = Eclipse+ 300  
 Spectrometer = DELTA\_NMR  
 Field\_strength = 7.0586013[T] (300[MHz]  
 X\_acq\_duration = 1.7334272[s]  
 X\_domain = 12C  
 X\_offset = 70.56823426[MHz]  
 X\_points = 32768  
 X\_prescans = 4  
 X\_resolution = 0.57689184[Hz]  
 X\_sweep = 18.90359168[KHz]  
 Irr\_domain = 1H  
 Irr\_freq = 300.52965592[MHz]  
 Irr\_offset = 10ppm  
 C13\_offset = PHASE  
 Mod\_return = 1  
 Scans = 964  
 Total\_scans = 964  
 X\_90\_width = 11.3[us]  
 X\_acq\_time = 1.7334272[s]  
 X\_angle = 30[deg]  
 X\_pulse = 1.6866667[us]  
 Initial\_wait = 1[s]  
 Phase\_preset = 3[us]  
 Recvr\_gain = 30  
 Relaxation\_delay = 1[s]  
 Temp\_get = 20.6[dc]  
 Unblank\_time = 2[us]

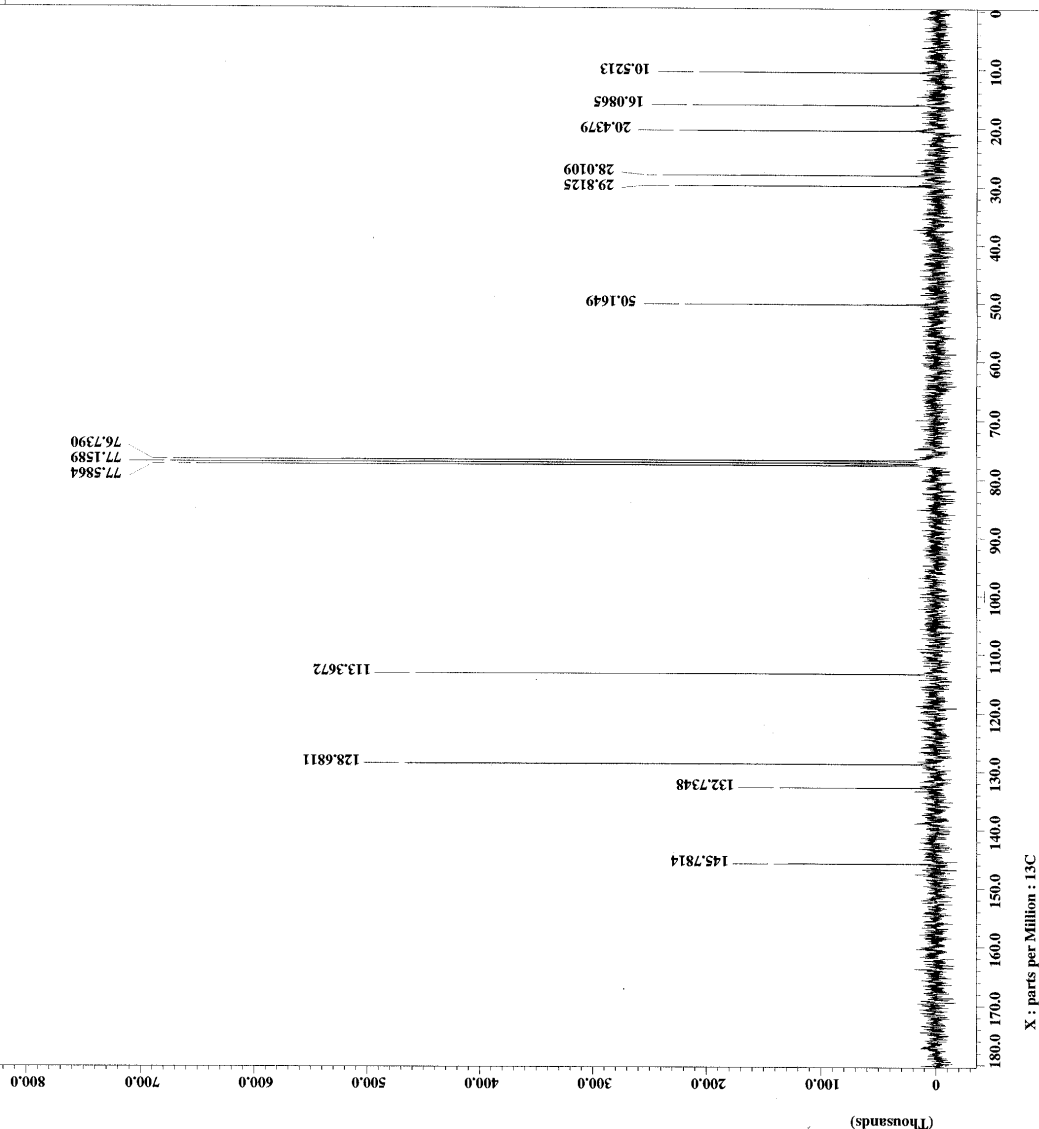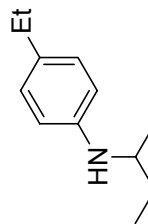

4h  
(Table 2, entry 7)

Data File D:\HPLC\HPCHEM\1\DATA\OSCAR\MS000407.D  
080825-coa-03

Sample Name: Reacc 429F23

Chiralcel OD 100 5 250x 4.6 mm  
hexano/isopropanol 90/10  
flujo 1 ml/min  
UV 254 nm

=====  
Injection Date : 04/09/08 1:10:41 PM  
Sample Name : Reacc 429F23  
Acq. Operator : carmen  
Acq. Method : C:\HPCHEM\1\METHODS\QUIRAL.M  
Last changed : 04/09/08 11:49:21 AM by carmen  
(modified after loading)  
Analysis Method : C:\HPCHEM\1\METHODS\QUIRAL.M  
Last changed : 11/09/08 11:09:31 AM by carmen  
(modified after loading)  
para Le legadec  
=====

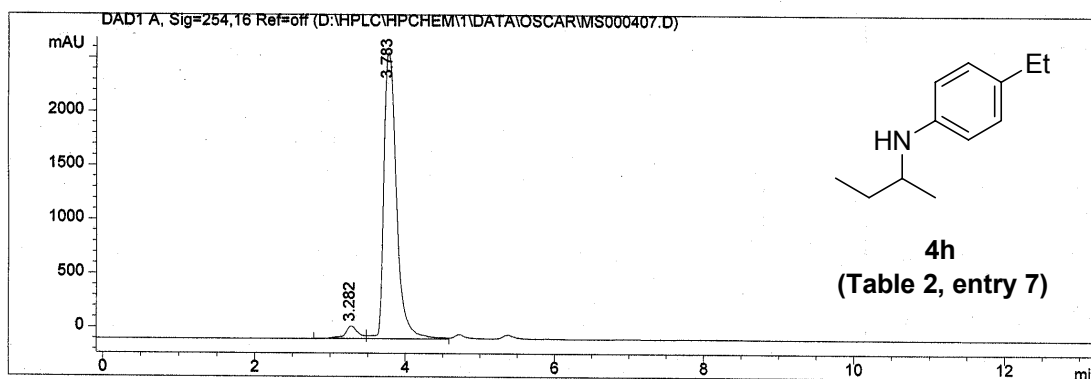

=====  
Area Percent Report  
=====

Sorted By : Signal  
Multiplier : 1.0000  
Dilution : 1.0000

Signal 1: DAD1 A, Sig=254,16 Ref=off  
Results obtained with enhanced integrator!

| Peak # | RetTime [min] | Type | Width [min] | Area [mAU*s] | Height [mAU] | Area %  |
|--------|---------------|------|-------------|--------------|--------------|---------|
| 1      | 3.282         | BV   | 0.1674      | 1359.57544   | 117.16486    | 4.1915  |
| 2      | 3.783         | VV   | 0.1846      | 3.10769e4    | 2654.95972   | 95.8085 |

Totals : 3.24365e4 2772.12458 ee= 91.61 ~92%

=====  
\*\*\* End of Report \*\*\*  
=====

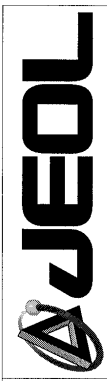

Reacc410F6-1H-6.jdf  
File: Reacc410F6-1H-6.jdf  
Author: Cabrera  
Experiment: single\_pulse.exp  
Sample\_id: laura  
Solvent: CHLOROFORM-D  
Creation\_time: 11-APR-2008 09:48:29  
Acquisition\_time: 11-APR-2008 14:08:04  
Current\_time: 1-SEP-2008 14:08:04  
Comment: Single Pulse Experiment  
Data\_format: ID COMPLEX  
Data\_size: 16384  
Dim\_title: 1H  
Dim\_units: [ppm]  
Dimensions: X 300.52965592 [MHz]  
Spectrometer: DELTA\_NMR  
Field\_strength: 7.0586013 [T] (300 [MHz])  
X\_acq\_duration: 3.6339712 [s]  
X\_domain: 1H  
X\_freq: 300.52965592 [MHz]  
X\_offset: 5 [ppm]  
X\_resolution: 0.27518105 [Hz]  
X\_sweep: 4.50856628 [kHz]  
X\_resolution: 0.27518105 [Hz]  
Mod\_return: FALSE  
Scans: 1  
Total\_scans: 32  
X\_90\_width: 9.5 [us]  
X\_acq\_time: 3.6339712 [s]  
X\_angle: 45 [deg]  
X\_pulse: 4.75 [us]  
Initial\_wait: 1 [s]  
Phase\_preset: 2 [us]  
Recvr\_gain: 1 [s]  
Recvr\_gain\_delay: 19.4 [dc]  
Unblank\_time: 2 [us]

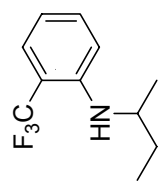

4i  
(Table 2, entry 8)

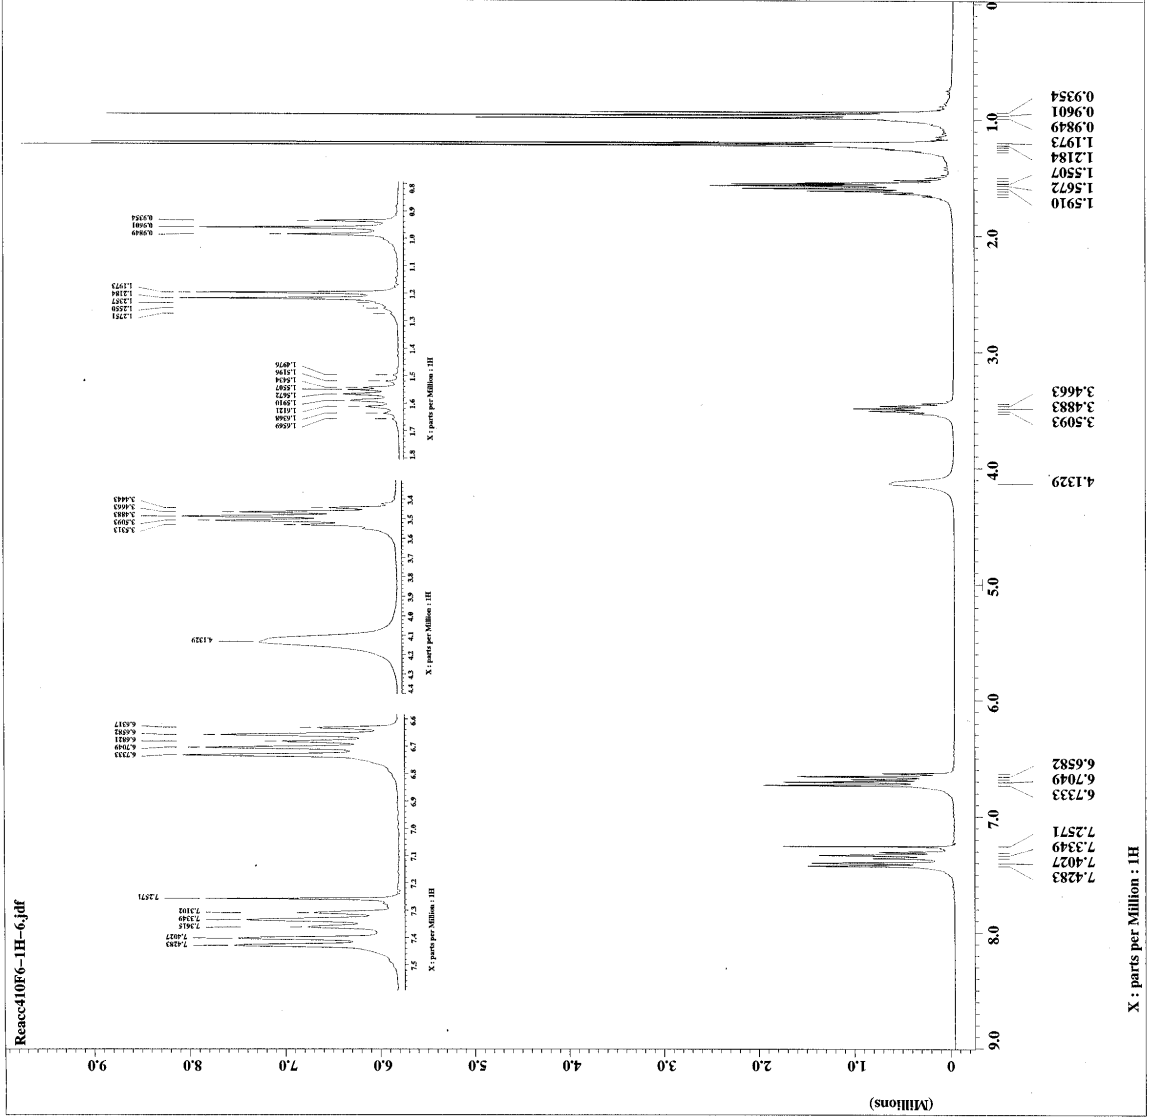

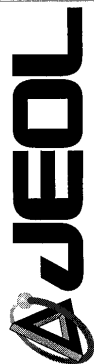

Reacc410F6-13C-5.jdf

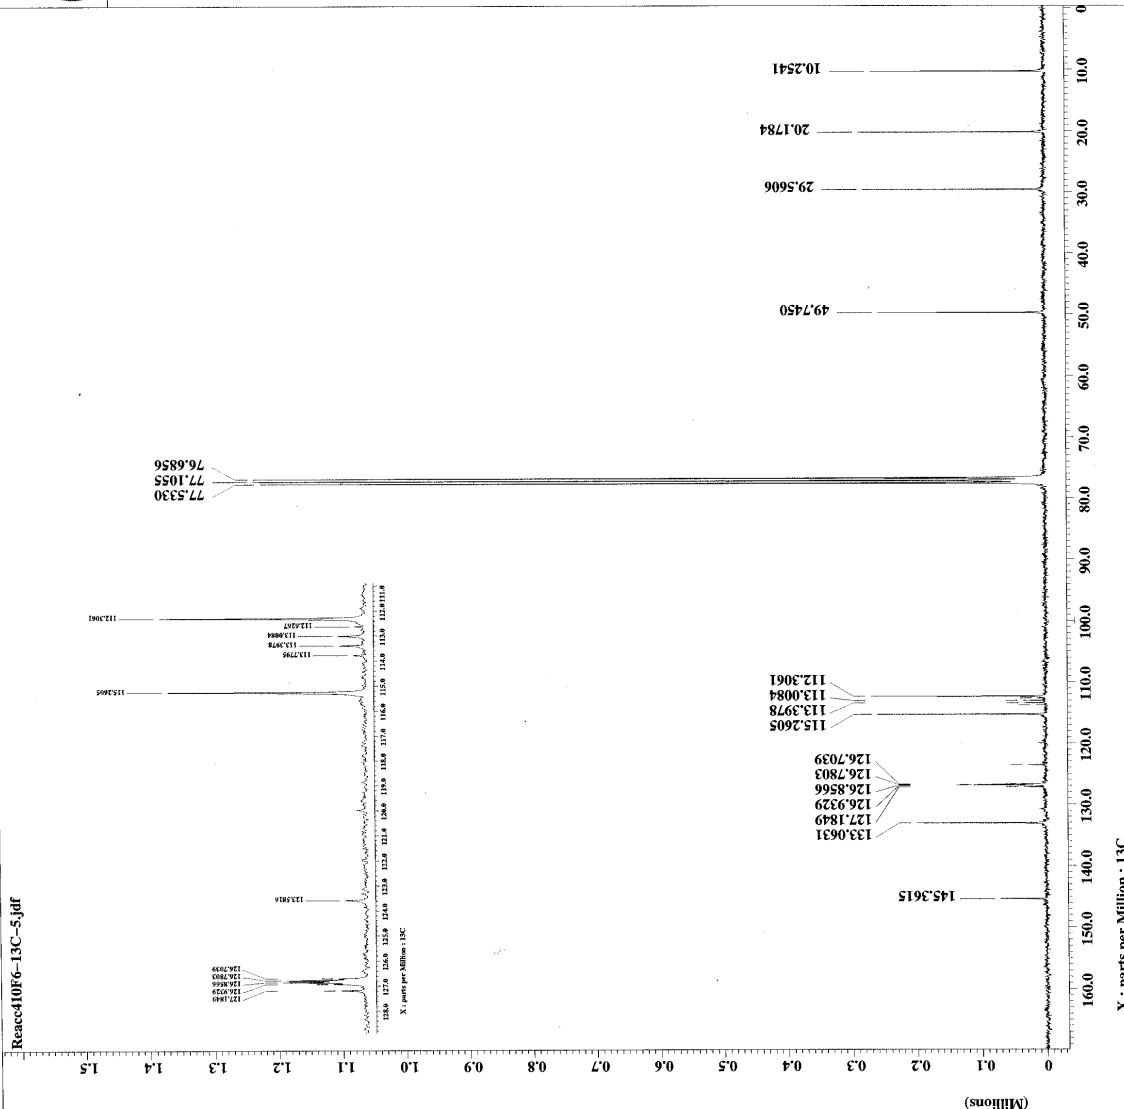

Filename = Reacc410F6-13C-5.jdf  
Author = Cabrera  
Experiment = single\_pulse\_dec  
Sample\_id = Laura  
Solvent = CHLOROFORM-D  
Acq\_date\_time = 1-SEP-2008 15:08:40  
Rev date\_time = 1-SEP-2008 14:09:19  
Current\_time = 1-SEP-2008 14:12:37  
Comment = Single Pulse with Bro  
Data\_format = 1D COMPLEX  
Data\_size = 32768  
Data\_title = 13C  
Data\_units = [ppm]  
Dimensions = X  
Site = Eclipse+ 300  
Spectrometer = DELTA\_NMR  
Field\_strength = 7.0586013[T] (300[MHz]  
X\_acq\_duration = 1.734272[s]  
X\_domain = 18.90359168[MHz]  
X\_freq = 75.5693426[MHz]  
X\_offset = 100[ppm]  
X\_points = 32768  
X\_prescans = 4  
X\_resolution = 0.57689184[Hz]  
X\_sweep = 18.90359168[MHz]  
Irr\_domain = 18.90359168[MHz]  
Irr\_freq = 30.52965592[MHz]  
Irr\_offset = 50[ppm]  
Clipped = FALSE  
Mod\_return = 1  
Scans = 7000  
Total\_scans = 7000  
X\_90\_width = 11.3[us]  
X\_acq\_time = 1.734272[s]  
X\_delay = 30[deg]  
X\_pulse = 3.76666667[us]  
Initial\_wait = 1[s]  
Phase\_preset = 3[us]  
Recvr\_gain = 30  
Relaxation\_delay = 1[s]  
Temp\_get = 20.9[dc]  
Undilut\_time = 2[us]

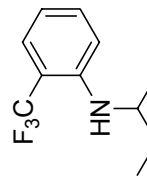

4i  
(Table 2, entry 8)

Reacc410F21  
080616-coa-10

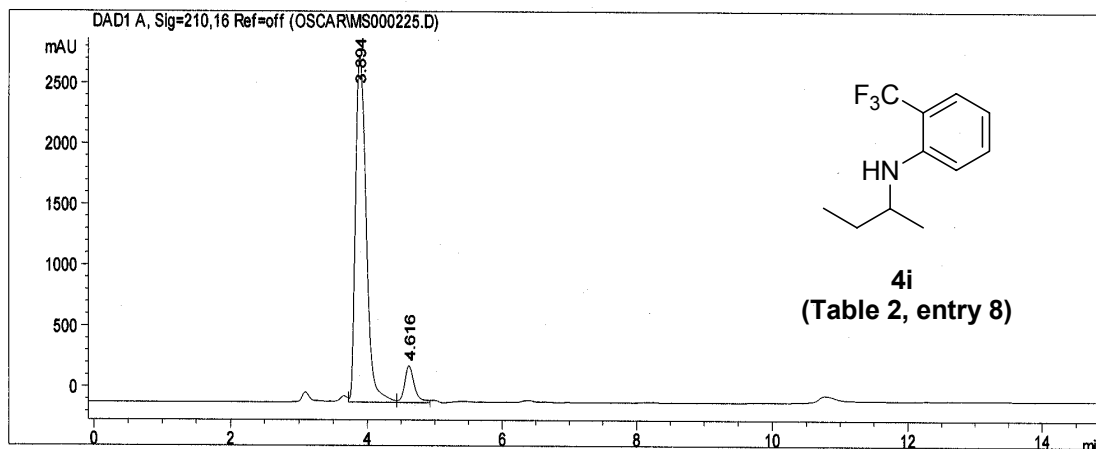

Data File C:\HPCHEM\1\DATA\OSCARMS000225.D Sample Name: Reacc410F21  
HPLC IQ 18/06/08 3:50:52 PM carmen  
Chiralcel OD 25x 4.6 mm  
hexano/isopropanol 92/8  
flujo 1 ml/min  
UV 210

Injection Date : 16/06/08 3:32:37 PM  
Sample Name : Reacc410F21 Vial : 1  
Acq. Operator : carmen  
Acq. Method : C:\HPCHEM\1\METHODS\QUIRAL.M  
Last changed : 16/06/08 3:24:23 PM by carmen  
(modified after loading)  
Analysis Method : C:\HPCHEM\1\METHODS\QUIRAL.M  
Last changed : 18/06/08 3:38:29 PM by carmen  
(modified after loading)  
para Cabrera Armando

#### Area Percent Report

Sorted By : Signal  
Multiplier : 1.0000  
Dilution : 1.0000

Signal 1: DAD1 A, Sig=210,16 Ref=off  
Results obtained with enhanced integrator!

| Peak #   | RetTime [min] | Type | Width [min] | Area [mAU*s] | Height [mAU] | Area %  |
|----------|---------------|------|-------------|--------------|--------------|---------|
| 1        | 3.894         | VV   | 0.1715      | 3.12233e4    | 2856.57617   | 91.2217 |
| 2        | 4.616         | VV   | 0.1480      | 3004.63037   | 302.16672    | 8.7783  |
| Totals : |               |      |             | 3.42279e4    | 3158.74289   |         |

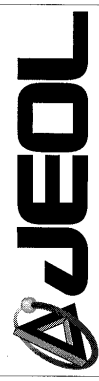

Reacc406F1920-1H-6.jdf

Filename = Reacc406F1920-1H-6.jdf  
Author = Cabrera  
Experiment = single\_pulse.exp  
Sample\_id = Laura  
Solvent = CHLOROFORM-D  
Creation\_time = 9-MAR-2008 20:11:54  
Revision\_time = 2-SEP-2008 07:09:21  
Current\_time = 2-SEP-2008 07:11:18  
Comment = Single Pulse Experiment  
Data\_format = 1D COMPLEX  
Dim\_size = 16384  
Dim\_title = 1H  
Dim\_units = [ppm]  
Dimensions = X  
Site = Eclipse-300  
Spectrometer = JEOL-300  
Field\_strength = 7.0586013[T] (300[MHz]  
X\_acq\_duration = 3.6339712[s]  
X\_domain = 1H  
X\_freq = 300.52965592[MHz]  
X\_offset = 5[ppm]  
X\_points = 16384  
X\_resolution = 0.27518105[Hz]  
X\_sweep = 4.50856628[KHz]  
Clipped = FALSE  
Mod\_return = 1  
Scans = 32  
Total\_scans = 32  
X\_90\_width = 9.5[us]  
X\_acq\_time = 3.6339712[s]  
X\_angle = 45[deg]  
X\_pulse = 4.75[us]  
Initial\_wait = 1[s]  
Phase\_preset = 3[us]  
Recvr\_gain = 18  
Relaxation\_delay = 16.2[dc]  
Temperature = 300.2[K]  
Unblank\_time = 2[us]

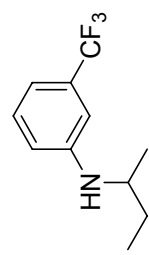

4j  
(Table 2, entry 9)

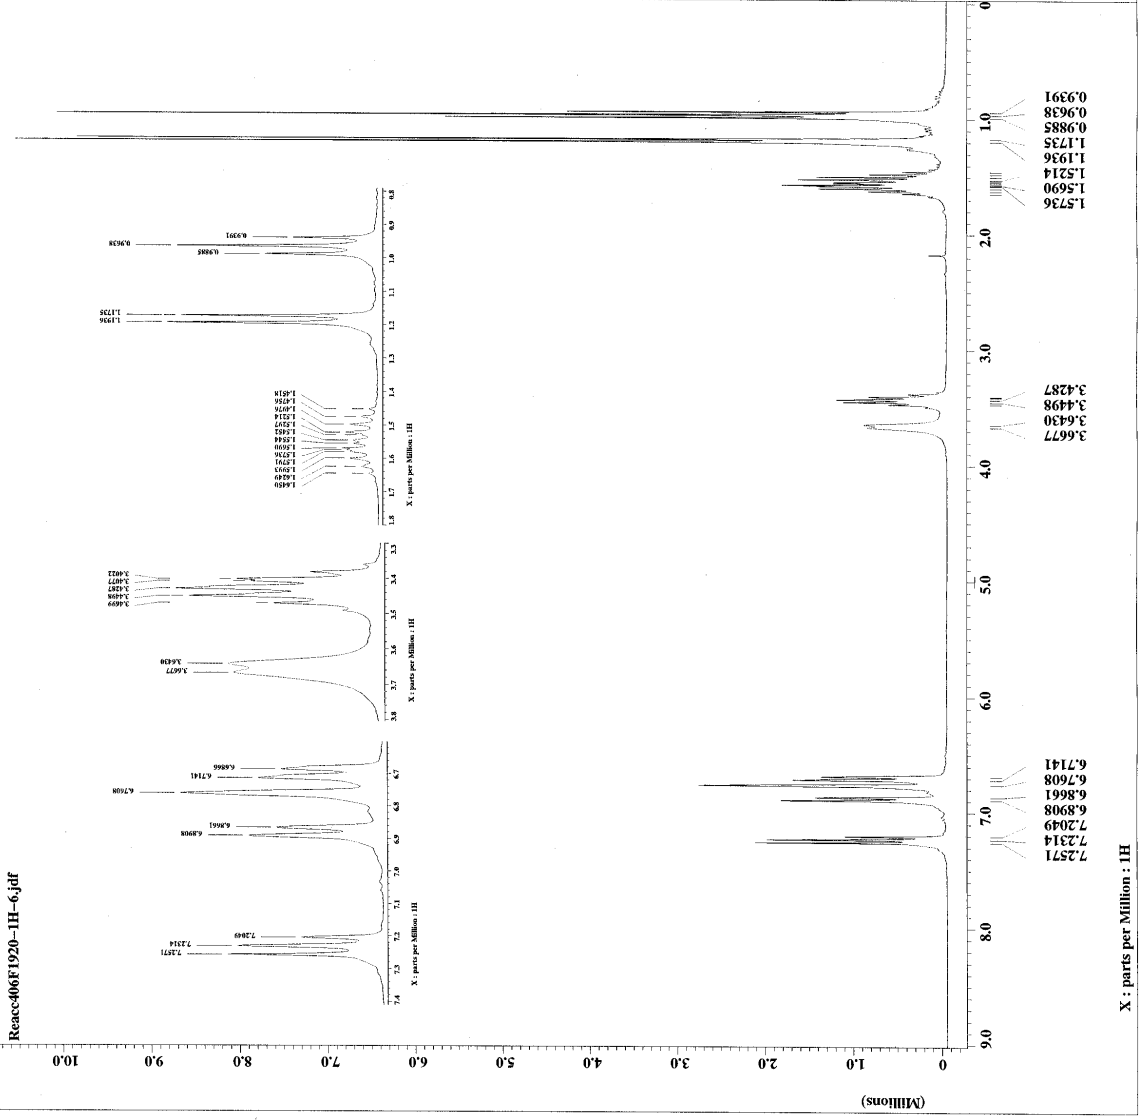

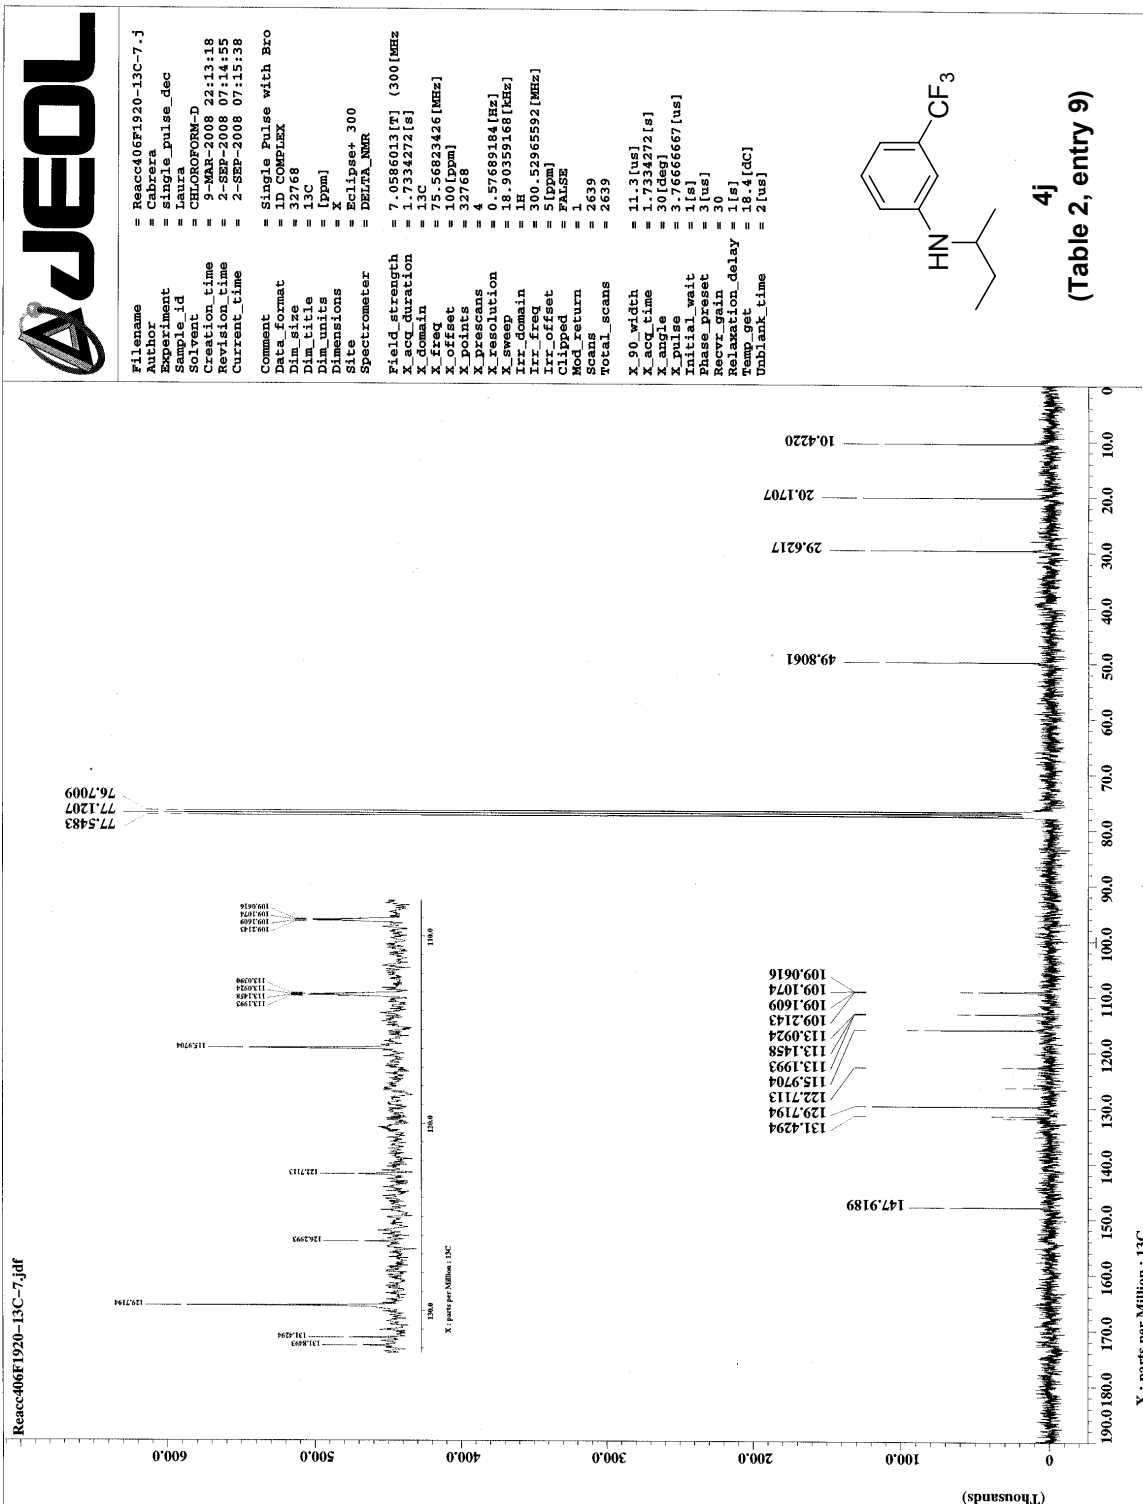

Reacc406F21  
080619-coa-08

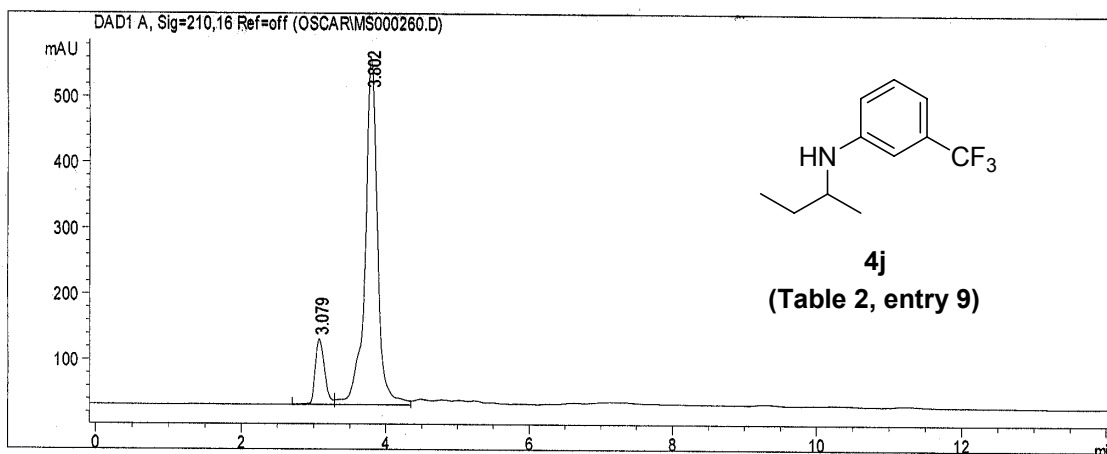

Data File C:\HPCHEM\1\DATA\OSCAR\MS000260.D Sample Name: Reacc406F21  
HPLC IQ 20/06/08 5:22:37 PM carmen  
Chiralcel OD 25x 4.6 mm  
hexano/isopropanol 92/8  
flujo 1 ml/min  
UV 210

=====  
Injection Date : 20/06/08 4:11:22 PM  
Sample Name : Reacc406F21 Vial : 1  
Acq. Operator : carmen  
Acq. Method : C:\HPCHEM\1\METHODS\QUIRAL.M  
Last changed : 20/06/08 3:40:09 PM by carmen  
(modified after loading)  
Analysis Method : C:\HPCHEM\1\METHODS\QUIRAL.M  
Last changed : 20/06/08 5:08:36 PM by carmen  
(modified after loading)  
para Le legadec

=====  
Area Percent Report  
=====

Sorted By : Signal  
Multiplier : 1.0000  
Dilution : 1.0000

Signal 1: DAD1 A, Sig=210,16 Ref=off  
Results obtained with enhanced integrator!

| Peak #   | RetTime [min] | Type | Width [min] | Area [mAU*s] | Height [mAU] | Area %  |
|----------|---------------|------|-------------|--------------|--------------|---------|
| 1        | 3.079         | BV   | 0.1435      | 892.61469    | 100.62816    | 12.2826 |
| 2        | 3.802         | VV   | 0.1802      | 6374.69727   | 530.28589    | 87.7174 |
| Totals : |               |      |             | 7267.31195   | 630.91405    |         |

cc = 75.43%

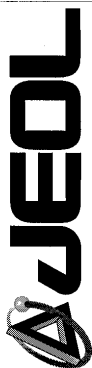

Reacc385F21-1H-8.jdf

```

Filename = Reacc385F21-1H-8.jdf
Author = Cabrera
Experiment = single_pulse.exp
Sample_id = 1
Pulse_program = zgpg30
Date_ = 25-MAR-2008 13:00:30
Creation_time = 25-MAR-2008 13:00:30
Revision_time = 2-SEP-2008 07:06:13
Current_time = 2-SEP-2008 07:08:46

Comment = Single Pulse Experiment
Data_format = 1D COMPLEX
Dim_size = 16384
Dim_title = 1H
F2 = 300.136
F2_offset = 0
F2_resolution = 0.27518105 [Hz]
F2_sweep = 4.50856628 [kHz]
F2_clipped = FALSE
Mod_return = 32
Sca = 32
Total_scans = 32

X 90_width = 9.5[us]
X 90_time = 3.6339712[s]
X_angle = 45[deg]
X_pulse = 4.75[us]
Initial_wait = 1[s]
Phase_delay = 1[us]
Relaxation_delay = 1[s]
Temp_get = 17.5[deg]
Unblank_time = 2[us]

Spectrometer = DELTA_NMR
Field_strength = 7.0586013 [T] (300 [MHz]
X_acq_duration = 3.6339712[s]
X_domain = 1H
X_freq = 300.52965592 [MHz]
X_offset = 50ppm
X_points = 16384
X_prescans = 0
X_resolution = 0.27518105 [Hz]
X_sweep = 4.50856628 [kHz]
X_clipped = FALSE
Mod_return = 32
Sca = 32
Total_scans = 32
  
```

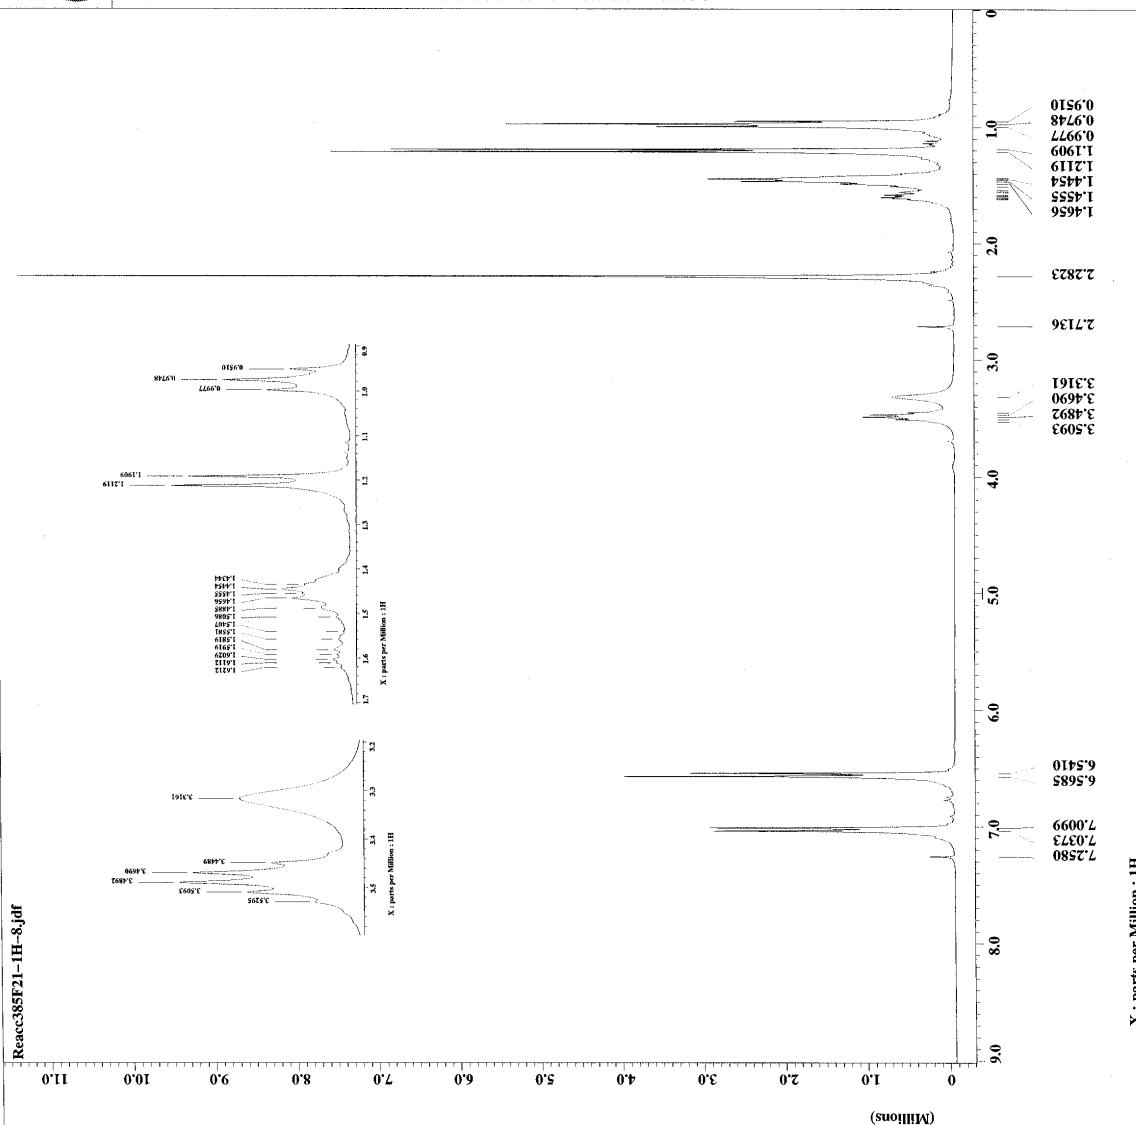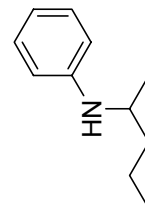

4k  
(Table 2, entry 10)

X : parts per Million : 1H

Reacc381F21-13C-4.jdf

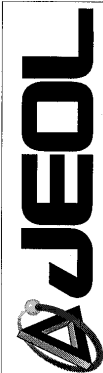

```

Filename = Reacc381F21-13C-4.jdf
Author = Cabrera
Experiment = Single_pulse_dec
Sample_id = 1
Solvent = CHLOROFORM-D
Creation time = 25-MAR-2008 13:58:11
Revision time = 2-SEP-2008 07:07:19
Current time = 2-SEP-2008 07:07:46

Comment = Single Pulse with Bro
Data_format = ID COMPLEX
Data_size = 12768
Dia title = 13C
Dia units = [ppm]
Dimensions = X
Site = Eclipset 300
Spectrometer = DELTA_NMR

Field_strength = 7.0586013[T] (300[MHz]
X_acq_duration = 1.734272[s]
X_domain = 18.90359168[kHz]
X_freq = 75.56823426[MHz]
X_offset = 100[ppm]
X_points = 32768
X_prescans = 4
X_resolution = 0.57689184[Hz]
X_sweep = 18.90359168[kHz]
Irr_domain = 18.90359168[kHz]
Irr_freq = 300.52965592[MHz]
Irr_offset = 100[ppm]
Clipped = FALSE
Mod_return = 1
Scans = 1150
Total_scans = 1150

X_90_width = 11.3[us]
X_acq_time = 1.734272[s]
X_angle = 30[deg]
X_delay = 3.16866667[us]
Initial_wait = 1[s]
Phase_preset = 3[us]
Recvr_gain = 30
Relaxation_delay = 1[s]
Temp_get = 19.4[dc]
Unblank_time = 2[us]
  
```

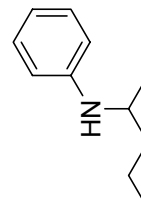

4k  
(Table 2, entry 10)

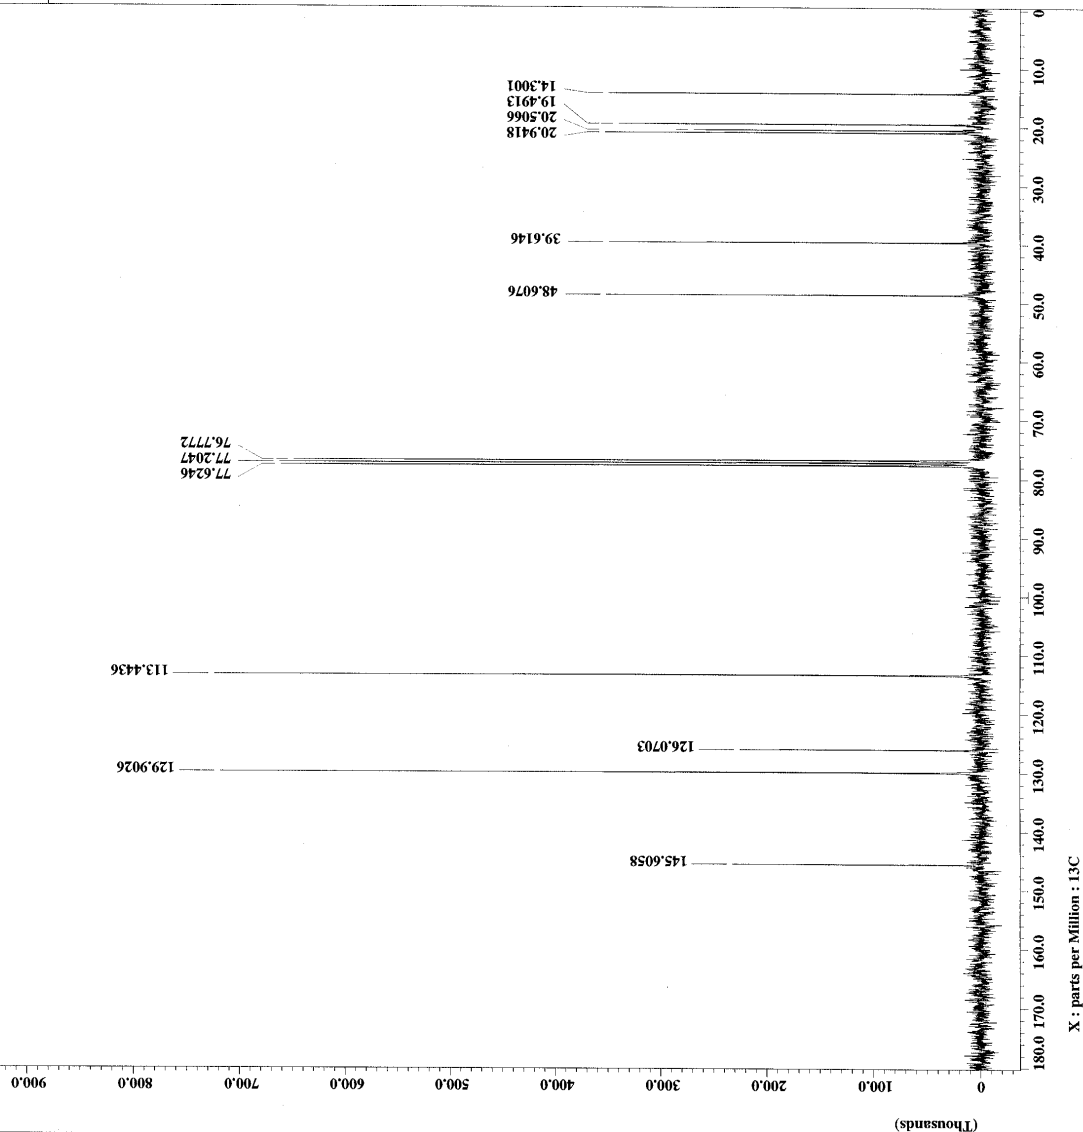

[ TIC ]

Data : Dr-Cabrera-Armando-004

Date : 04-Mar-108 14:46

Sample: 453 G Reacc 385 JeolAX505HA

Note : 5 horas

Inlet : GC

Ion Mode : EI+

Ion Species : Normal Ion

TIC Range : m/z 10 to 650

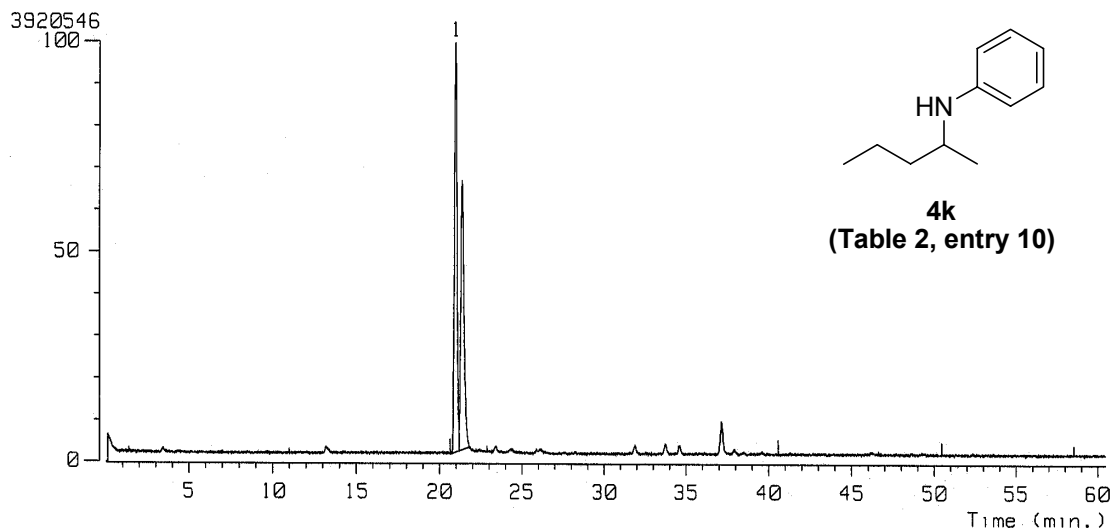

| No. | RT[min] | Area    | Area% | Height | Height% | Width[sec] | INTEG |
|-----|---------|---------|-------|--------|---------|------------|-------|
| 1   | 20.99   | 3966.79 | 54.78 | 364.66 | 60.35   | 10.21      | BV    |
| 2   | 21.36   | 3274.27 | 45.22 | 239.55 | 39.65   | 12.83      | VB    |

[ TIC ]

Data : Dr-Cabrera-Armando-004

Date : 04-Mar-108 14:46

Sample: 453 G Reacc 385 JeolAX505HA

Note : 5 horas

Inlet : GC

Ion Mode : EI+

Ion Species : Normal Ion [MF-Linear]

TIC Range : m/z 10 to 650

Output RT Range : 0.00 to 60.49 min

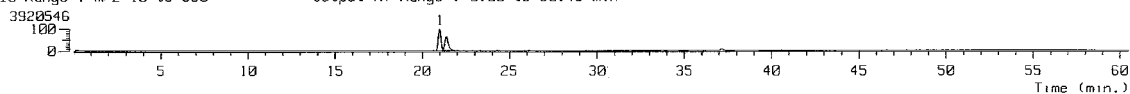

[ Mass Spectrum ]

RT : 20.99 min

Scan# : 1630-1603-1692

Temp : 0.0 deg.C

Ion Mode : EI+

Int. : 146.37

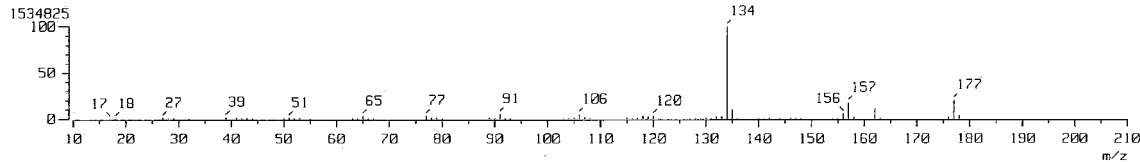

[ Mass Spectrum ]

RT : 21.36 min

Scan# : 1659-1603-1692

Temp : 0.0 deg.C

Ion Mode : EI+

Int. : 113.14

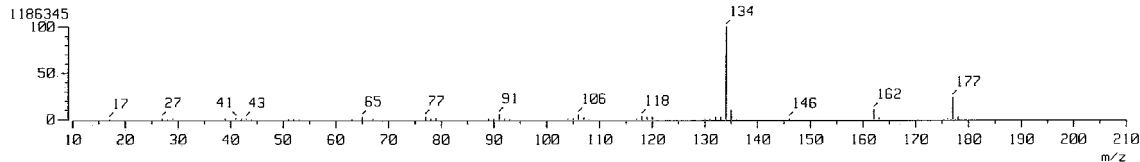

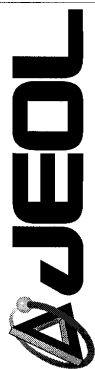

Reacc405F19-1H-5.jdf  
= Cabrera  
= single\_pulse.exp  
= laura  
= JNM-FX400  
= 7-MAR-2008 18:26:22  
= 1-SEP-2008 13:50:08  
= 1-SEP-2008 13:51:51  
= Single Pulse Experiment  
= ID COMPLEX  
= 16384  
= 1H  
= ppm  
= Eclipser 300  
= DELTA\_NMR  
= 7.0586013[T] (300[MHz]  
= 3.6339712[s]  
= 10.52965592[MHz]  
= 16384  
= 0  
= 0.27518105[Hz]  
= 4.50856628[MHz]  
= FALSE  
= 1  
= 2  
= 22  
= 9.5[us]  
= 3.6339712[s]  
= 45[deg]  
= 4.75[us]  
= 1[s]  
= 17[us]  
= 1[s]  
= 15.8[dc]  
= 2[us]

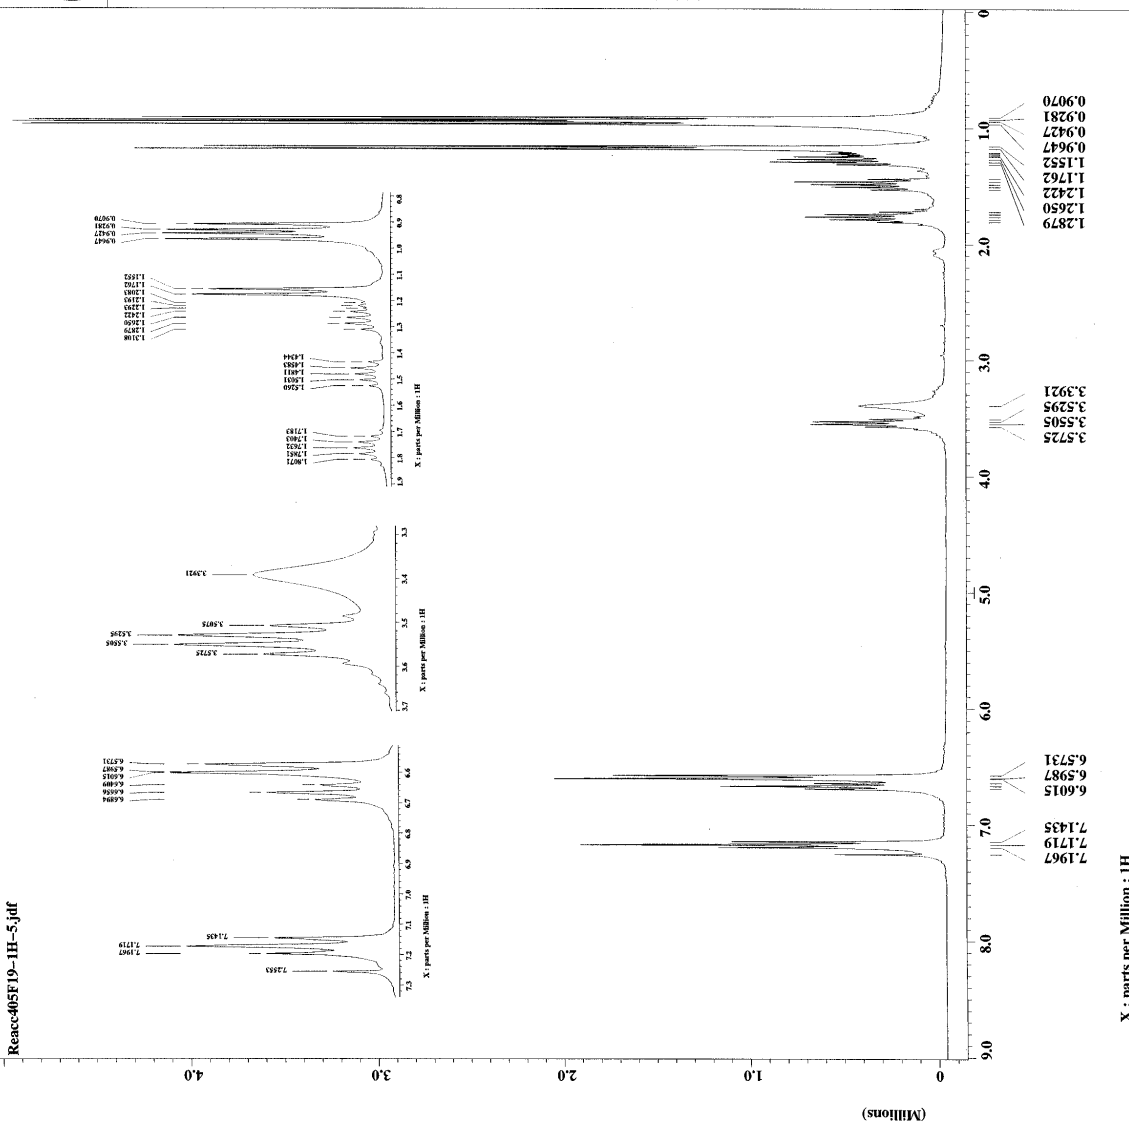

4I  
(Table 2, entry 11)

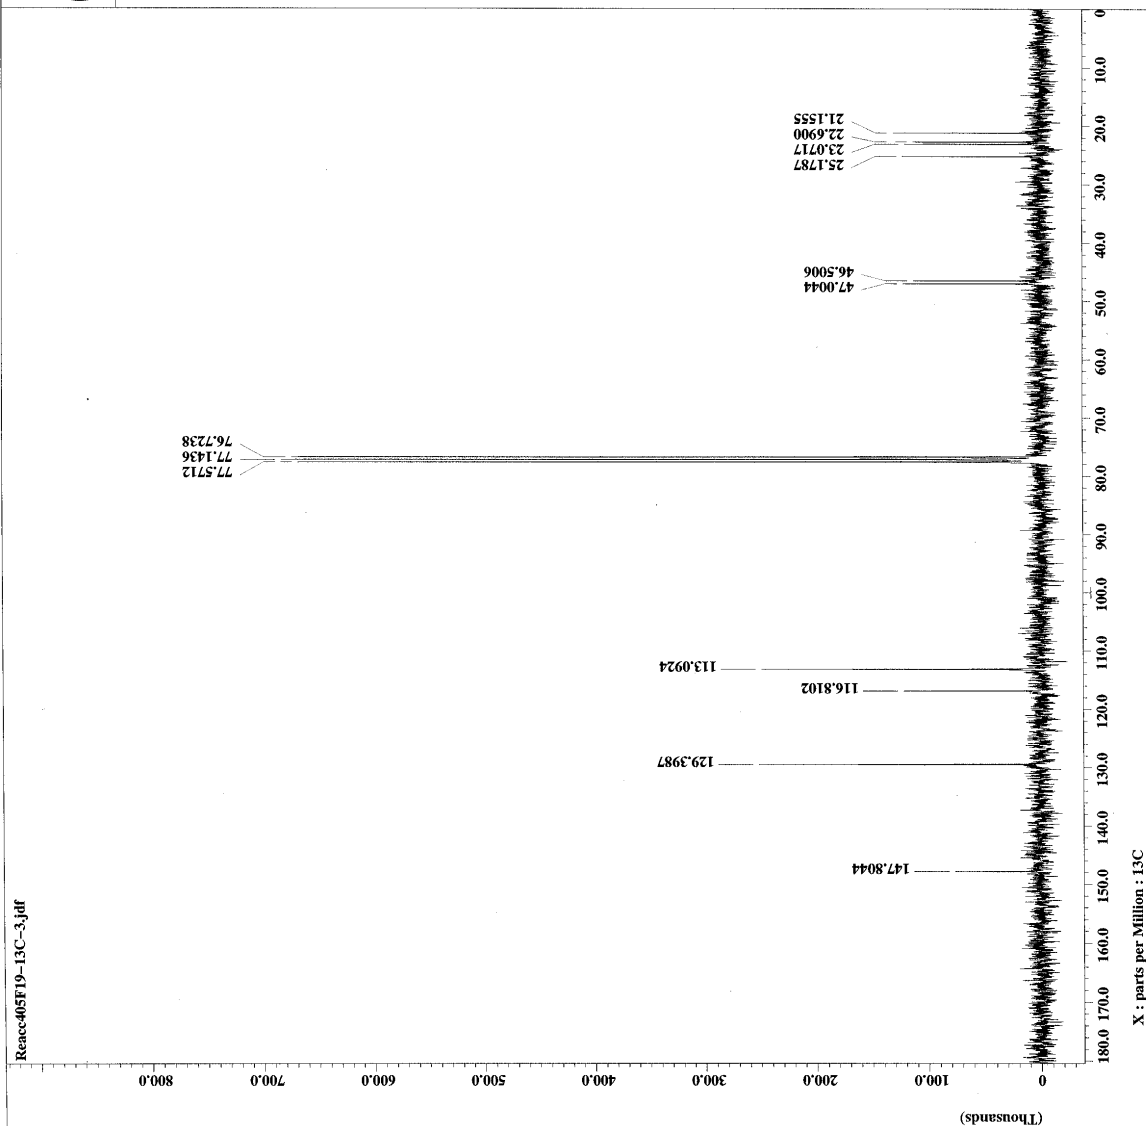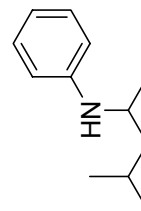

**4I**  
**(Table 2, entry 11)**



**JEONJU**

|                  |   |                          |
|------------------|---|--------------------------|
| Filename         | = | Reaco405F19-13C-3.jdl    |
| Author           | = | Cabrera                  |
| Experiment       | = | single_pulse_dec         |
| Sample_id        | = | Laurea                   |
| Solvent          | = | CHLOROFORM-D             |
| Creation_time    | = | 7-MAR-2008 19:42:00      |
| Revision_time    | = | 1-SEP-2008 13:55:19      |
| Current_time     | = | 1-SEP-2008 13:55:35      |
| Comment          | = | Single Pulse with Bro    |
| Data format      | = | 1D COMPLEX               |
| Dim size         | = | 32768                    |
| Dim title        | = | 13C                      |
| Dim units        | = | [ppm]                    |
| Dimensions       | = | X                        |
| Site             | = | Eclipse+ 300             |
| Spectrometer     | = | DELTA_NMR                |
| Field strength   | = | 7.0556013 [T] (300 [MHz] |
| X acq duration   | = | 1.73324272 [s]           |
| X domain         | = | 75.56823426 [MHz]        |
| X fref           | = | 100 [ppm]                |
| X offset         | = | 32768                    |
| X points         | = | 32768                    |
| X prescans       | = | 4                        |
| X resolution     | = | 4.57689184 [Hz]          |
| X rfreq          | = | 18.50359168 [MHz]        |
| Ir domain        | = | 1H                       |
| Ir fref          | = | 300.52965592 [MHz]       |
| Ir offset        | = | 5 [ppm]                  |
| Clipped          | = | FALSE                    |
| Mod return       | = | 1                        |
| Scans            | = | 1008                     |
| Total_scans      | = | 1008                     |
| X 90 width       | = | 11.3 [us]                |
| X acq time       | = | 1.73324272 [s]           |
| X angle          | = | 30 [deg]                 |
| X pulse          | = | 3.76666667 [us]          |
| Initial wait     | = | 1 [s]                    |
| Phase preset     | = | 3 [us]                   |
| Relaxation       | = | 1 [s]                    |
| Relaxation_delay | = | 1 [s]                    |
| Temp eq          | = | 18 [dC]                  |
| Unblank time     | = | 2 [us]                   |

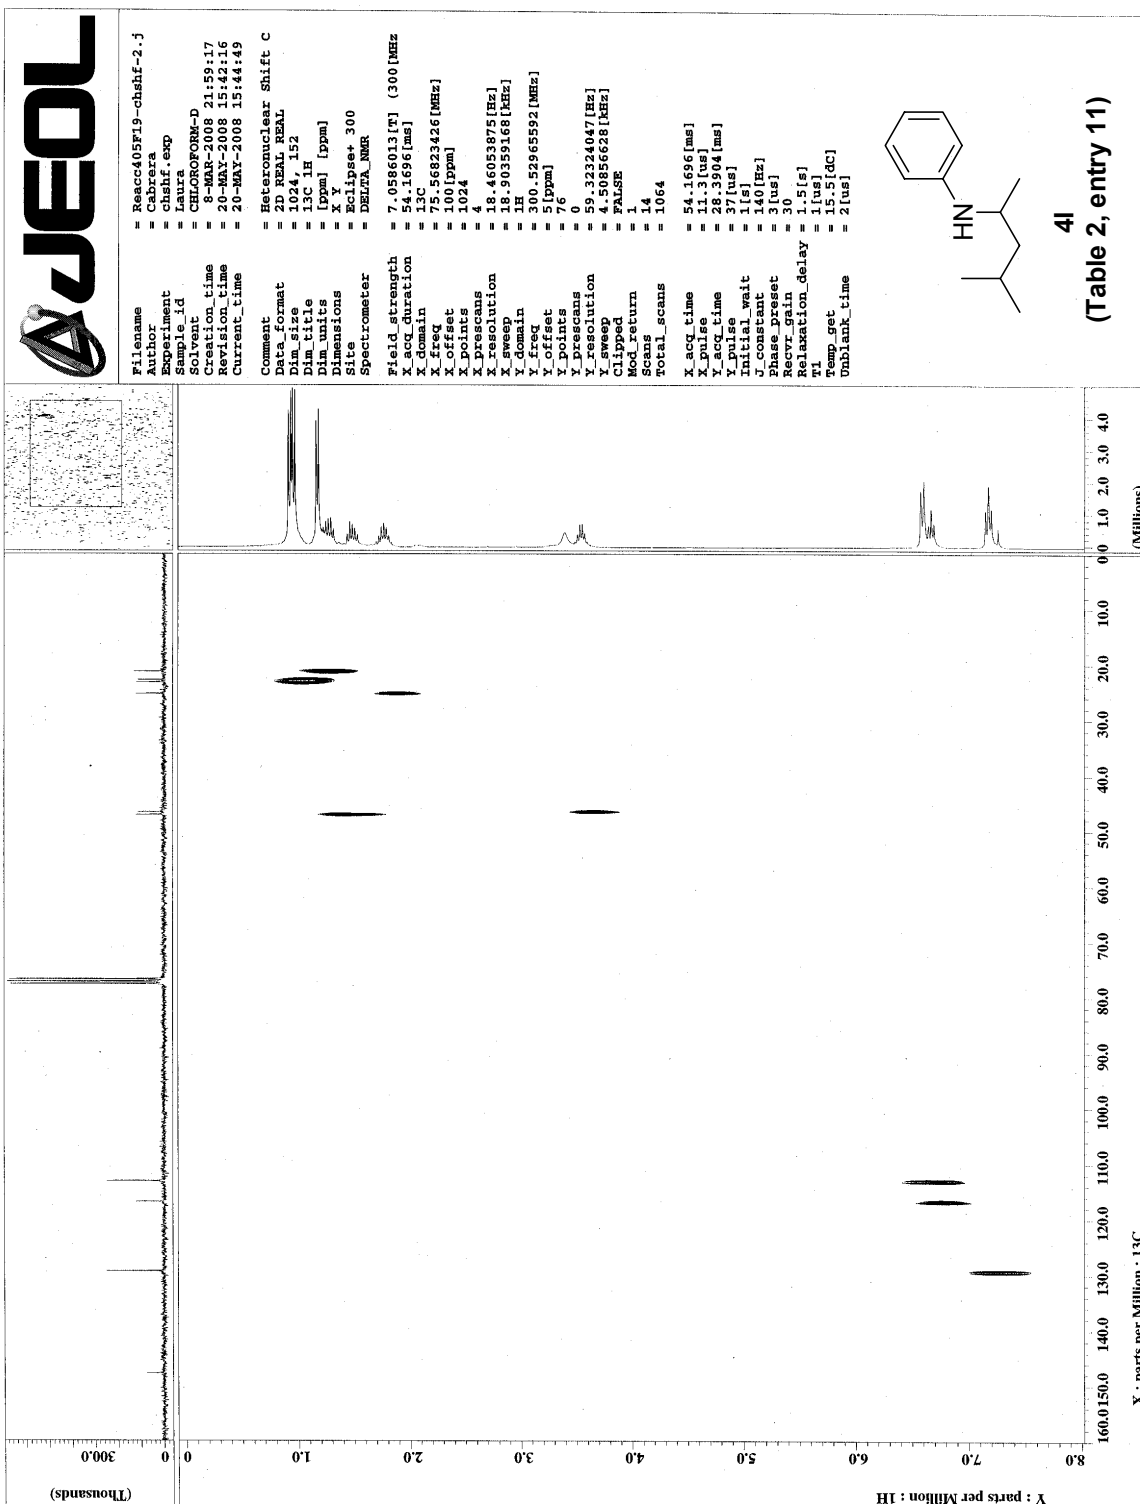

Reacc405  
080619-coa-07

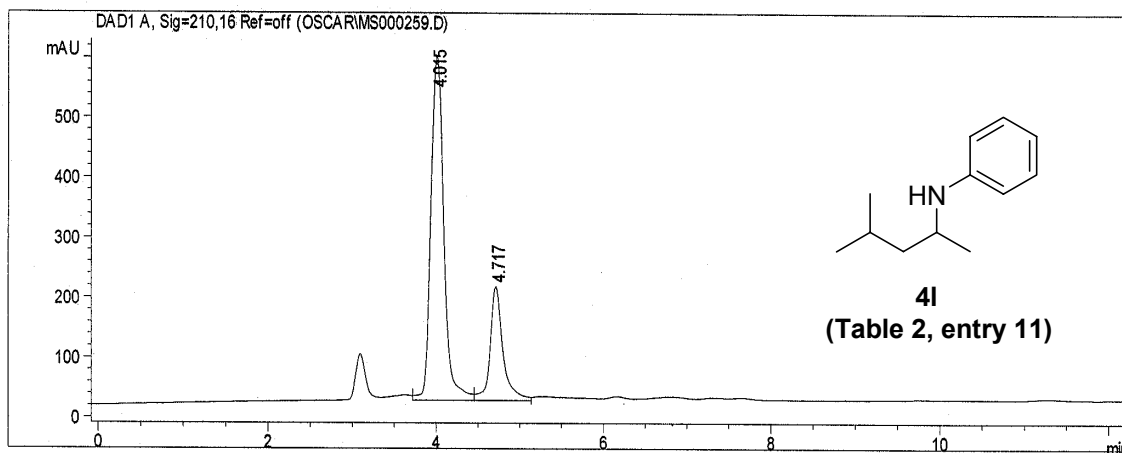

Data File C:\HPCHEM\1\DATA\OSCAR\MS000259.D Sample Name: Reacc405  
HPLC IQ 20/06/08 4:18:56 PM carmen  
Chiralcel OD 25x 4.6 mm  
hexano/isopropanol 92/8  
flujo 1 ml/min  
UV 210

=====

Injection Date : 20/06/08 3:57:57 PM  
Sample Name : Reacc405 Vial : 1  
Acq. Operator : carmen  
Method : C:\HPCHEM\1\METHODS\QUIRAL.M  
Last changed : 20/06/08 3:40:09 PM by carmen  
(modified after loading)  
para Le legadec

=====  
Area Percent Report  
=====

Sorted By : Signal  
Multiplier : 1.0000  
Dilution : 1.0000

Signal 1: DAD1 A, Sig=210,16 Ref=off  
Results obtained with enhanced integrator!

| Peak #   | RetTime [min] | Type | Width [min] | Area [mAU*s] | Height [mAU] | Area %  |
|----------|---------------|------|-------------|--------------|--------------|---------|
| 1        | 4.015         | VV   | 0.1700      | 6197.39795   | 574.00317    | 75.3456 |
| 2        | 4.717         | VV   | 0.1564      | 2027.89673   | 190.14859    | 24.6544 |
| Totals : |               |      |             | 8225.29468   | 764.15176    |         |

ee = 50.69%

**Dr. Armando Carbrera / Laura R. P.**

Disolvente: CDCl<sub>3</sub>

Eclipse 300 MHz Jeol (E)

No. Reg. 0884

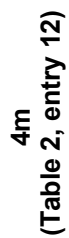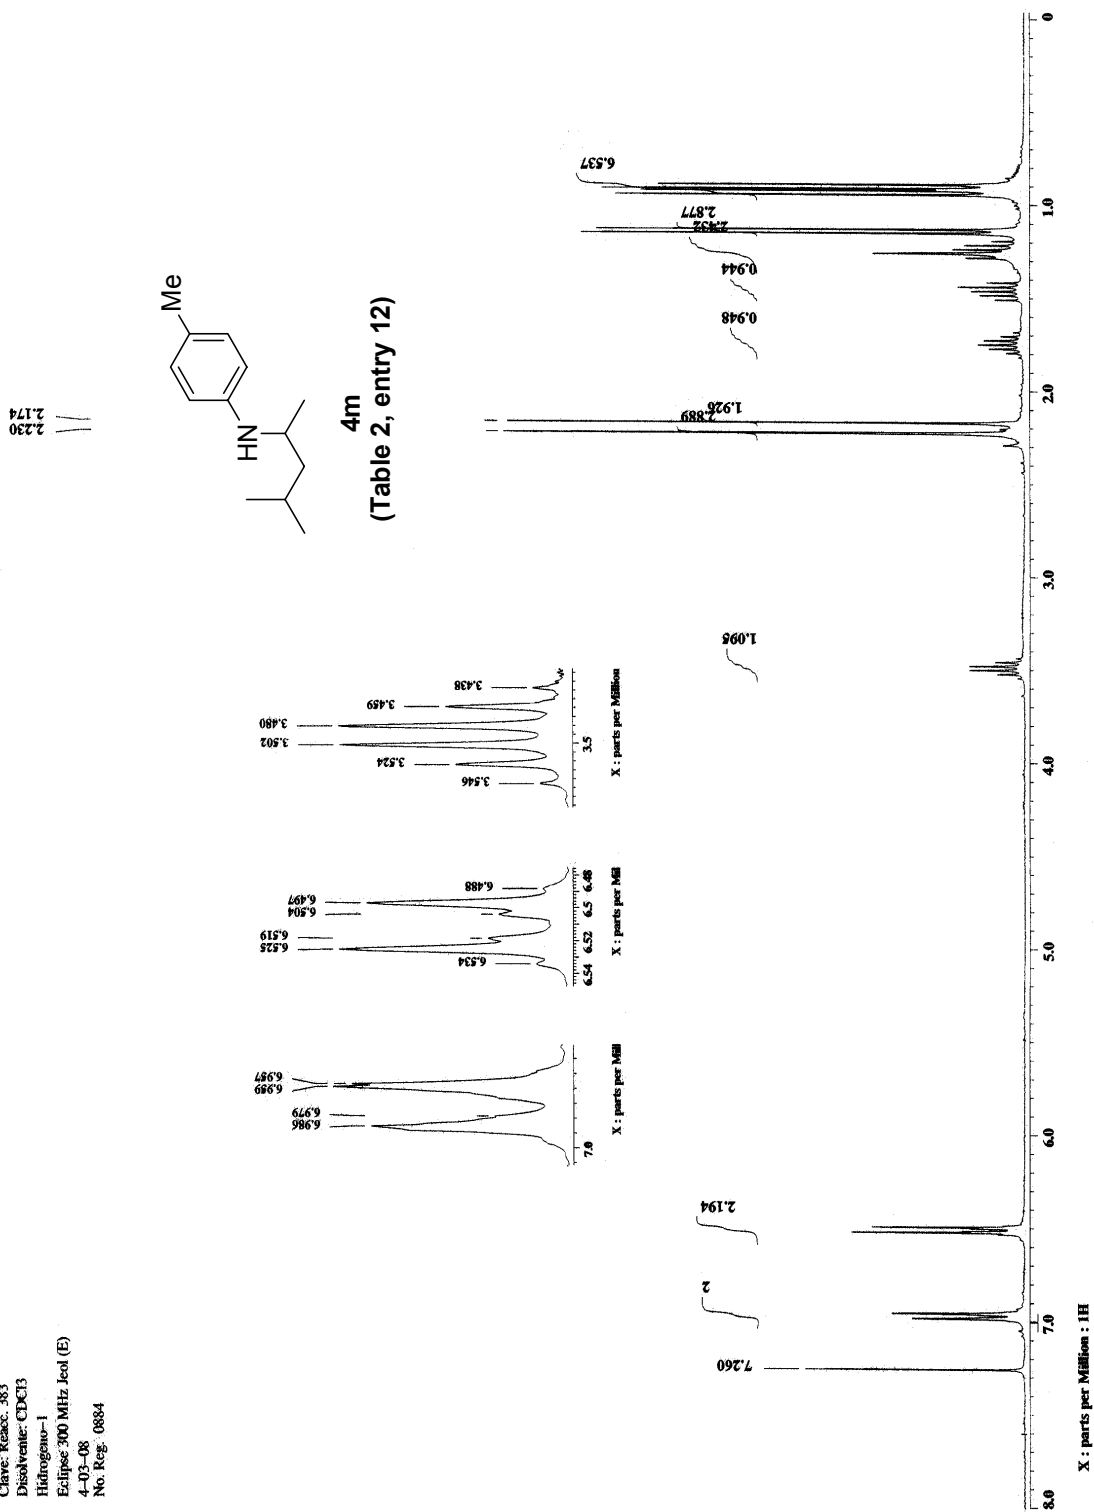

UNAM, INSTITUTO DE QUIMICA, apg  
 Dr. Armando Cabrera / Laura R. P.  
 Clave: Reacc. 383  
 Disolvente: CDCl<sub>3</sub>  
 Carbono-13  
 Eclipse 300 MHz Jeol (E)  
 4-03-08  
 No. Reg. 0884

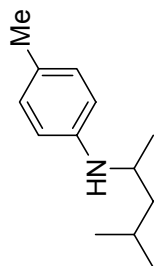

**4m**  
 (Table 2, entry 12)

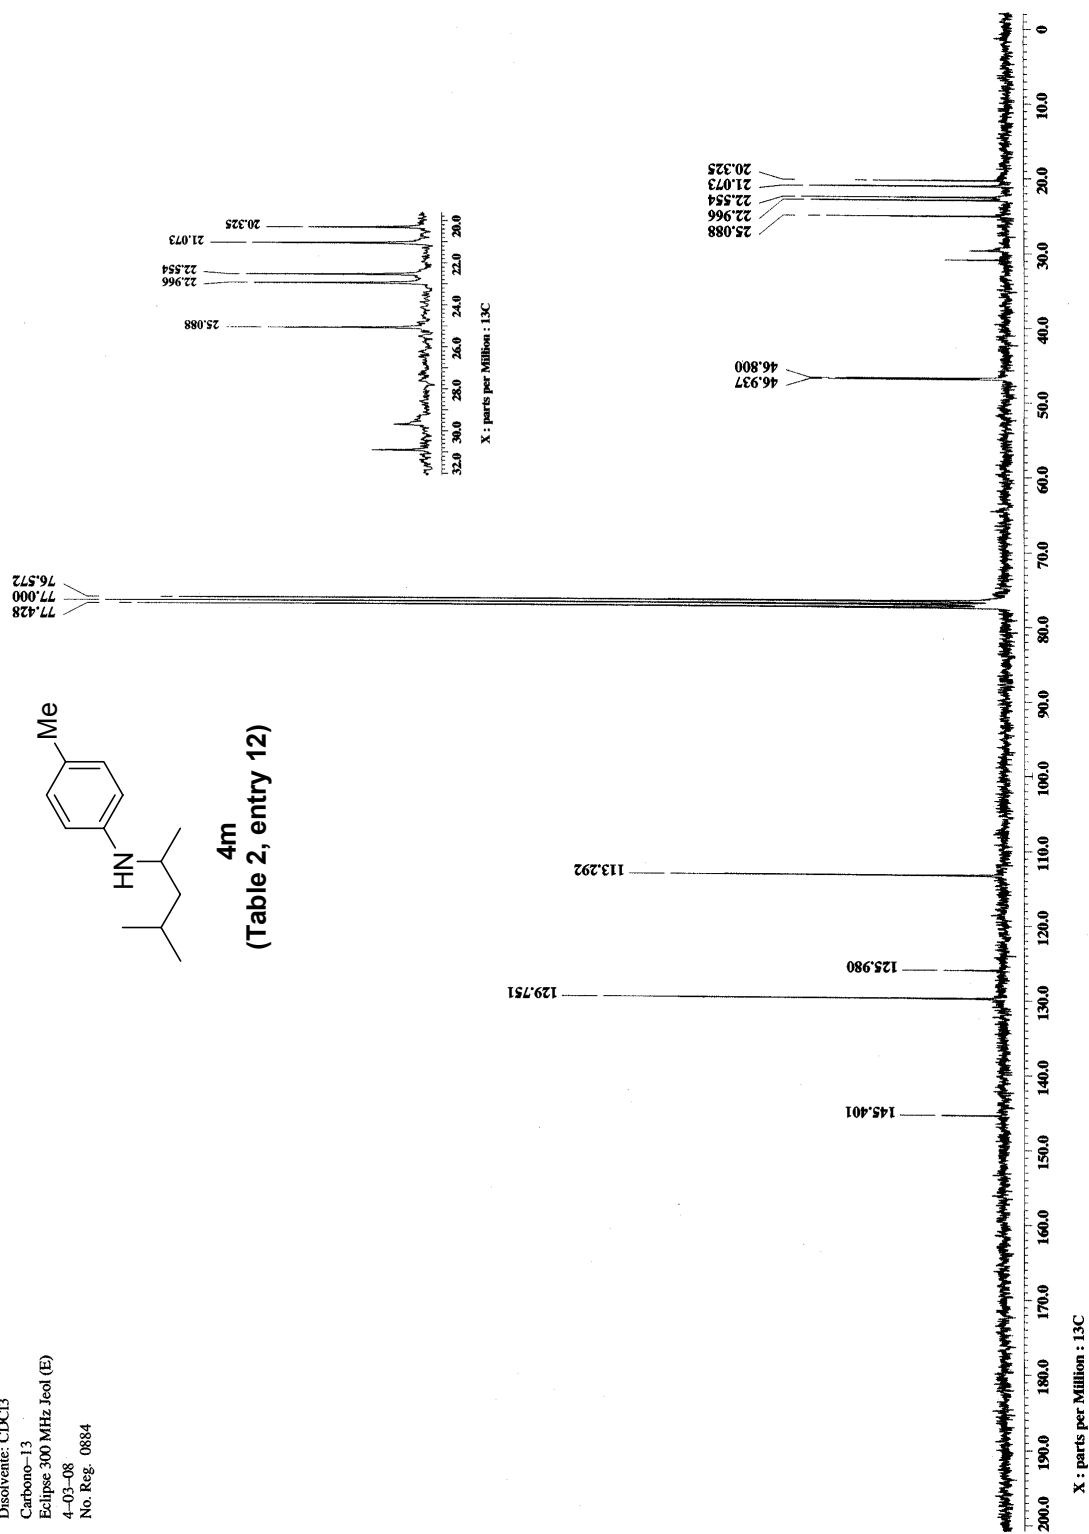

Data File C:\HPCHEM\1\DATA\MS000423.D  
080825-coa-06

Sample Name: Reacc 432F24

Chiralcel OD 100 5 250x 4.6 mm  
hexano/isopropanol 95/5  
flujo 1 ml/min  
UV 254 nm

=====

|                |                                |          |
|----------------|--------------------------------|----------|
| Injection Date | : 11/09/08 1:34:42 PM          |          |
| Sample Name    | : Reacc 432F24                 | Vial : 1 |
| Acq. Operator  | : 428                          |          |
| Method         | : C:\HPCHEM\1\METHODS\QUIRAL.M |          |
| Last changed   | : 11/09/08 12:35:40 PM by 428  |          |
|                | (modified after loading)       |          |

para Le legadec

=====

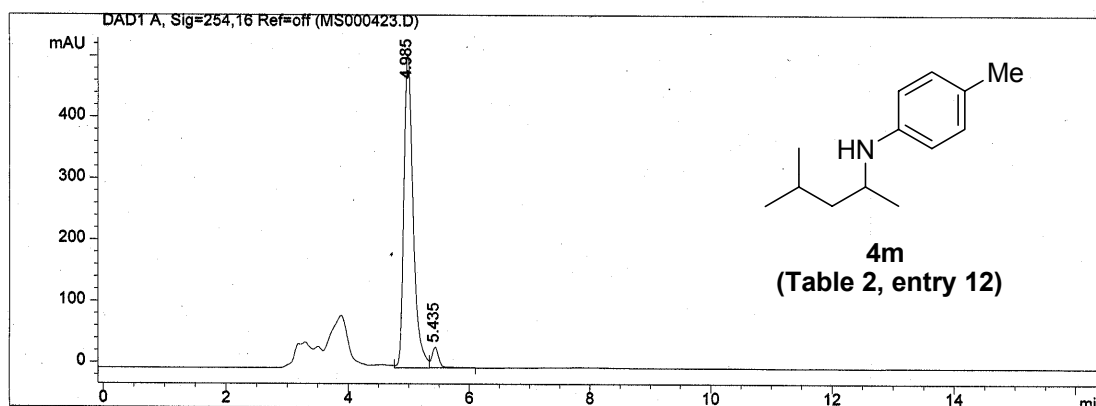

=====

Area Percent Report

=====

Sorted By : Signal  
Multiplier : 1.0000  
Dilution : 1.0000

Signal 1: DAD1 A, Sig=254,16 Ref=off  
Results obtained with enhanced integrator!

| Peak # | RetTime [min] | Type | Width [min] | Area [mAU*s] | Height [mAU] | Area %  |
|--------|---------------|------|-------------|--------------|--------------|---------|
| 1      | 4.985         | VV   | 0.1598      | 5433.41309   | 511.96649    | 95.1338 |
| 2      | 5.435         | VB   | 0.1191      | 277.92603    | 34.10902     | 4.8662  |

Totals : 5711.33911 546.07551

=====

\*\*\* End of Report \*\*\*

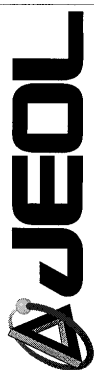

Filename = Reacc433F24-1H-7.jdf  
 Author = Cabrera  
 Experiment = single\_pulse.exp  
 Sample\_id = Laura  
 Solvent = CHLOROFORM-D  
 Acquisition\_time = 09:15:09  
 Revision\_time = 1-SEP-2008 14:18:01  
 Current\_time = 1-SEP-2008 14:18:34  
 Comment = Single Pulse Experiment  
 Data\_format = 1D COMPLEX  
 Data\_size = 16384  
 Data\_title = 1H  
 Data\_units = [ppm]  
 Dimensions = 1  
 Site\_name = Eolipse+ 300  
 Spectrometer = DELTA\_NMR  
 Field\_strength = 7.0586013[T] (300 [MHz]  
 X\_acq\_duration = 3.6339712[s]  
 X\_domain = 1H  
 X\_freq = 300.52965592[MHz]  
 X\_gamma = 680  
 X\_points = 16384  
 X\_prescans = 0  
 X\_resolution = 0.27518105[Hz]  
 X\_sweep = 4.50856628[MHz]  
 Clipped = FALSE  
 Mod\_return = 1  
 Scans = 64  
 Total\_scans = 64  
 X\_90\_width = 9.5[us]  
 X\_acq\_time = 3.6339712[s]  
 X\_angle = 45[deg]  
 X\_pulse = 4.75[us]  
 Initial\_wait = 1[s]  
 Phase\_preset = 3[us]  
 Repetition\_time = 1[s]  
 Relaxation\_delay = 19.5[dc]  
 Temp\_get = 19.5[dc]  
 Unblank\_time = 2[us]

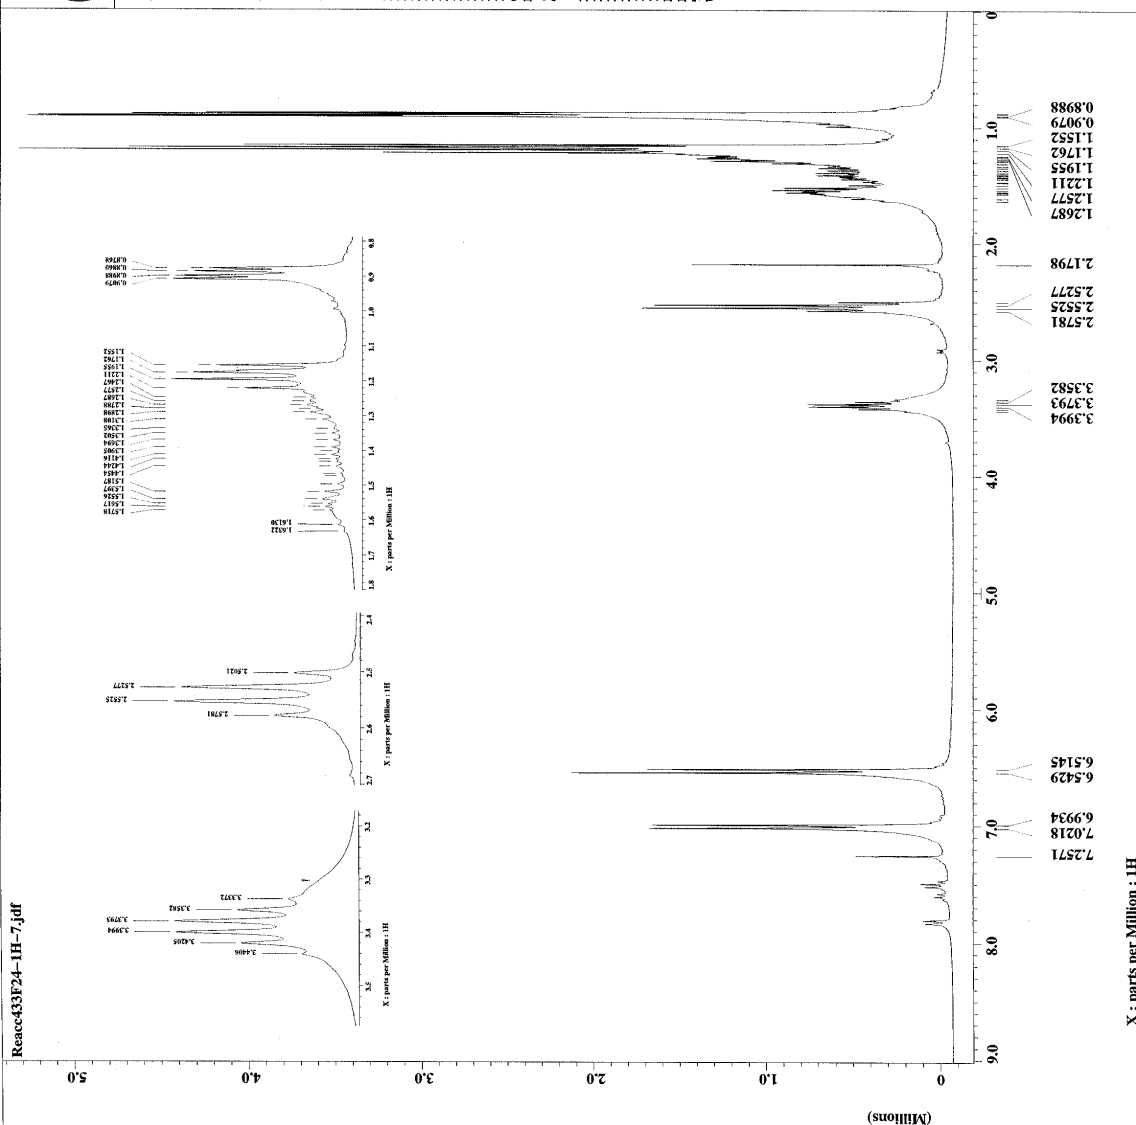

4n  
(Table 2, entry 13)

Reacc433F25-13C-4.jdf

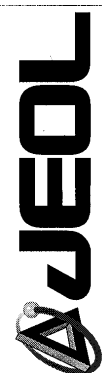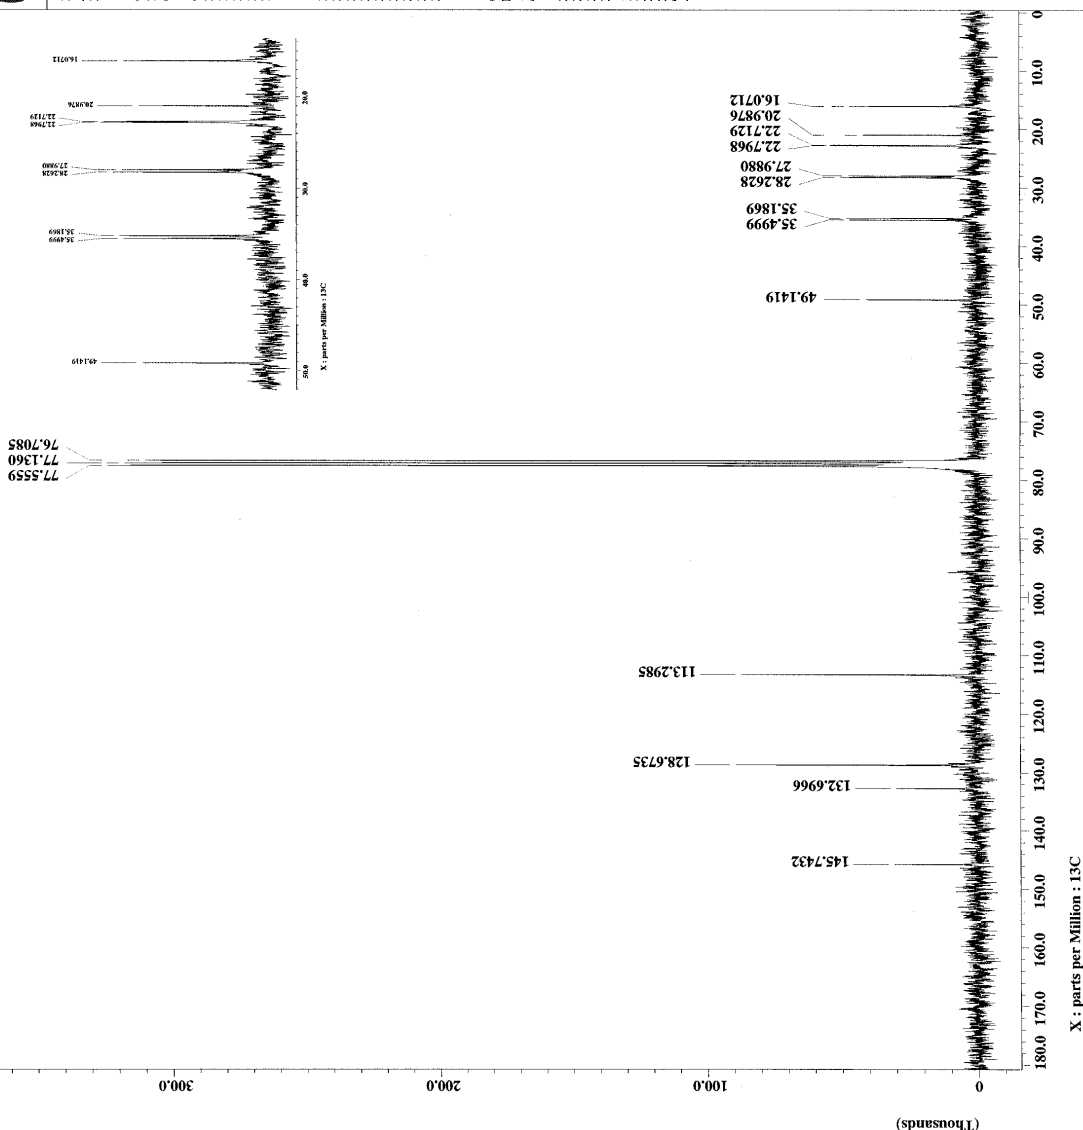

```

=====
File       Reacc433F25-13C-4.jdf
Name
Experiment single_pulse_dec
Sample_id   Laura
Solvent     CHLOROFORM-D
Creation_time 11-JUN-2008 09:09:17
Revision_time 1-SEP-2008 14:14:01
Current_time 1-SEP-2008 14:14:38
=====
Comment     Single Pulse with Bro
            13C CPDPRFLEX
            13C
            32768
            [ppm]
            X
            Eclips+ 300
            DELTA_NMR
=====
Spectrometer
Field_strength 7.0586013[F] (300[MHz]
Acq_duration 13.7534272[s]
X_offset 137
X_freq 75.56823426[MHz]
X_offset 100[ppm]
X_points 32768
X_resolution 4
X_prescans 0.57689184[Hz]
X_sweep 18.90359168[MHz]
X_domain 300.52965592[MHz]
X_resolution 51[ppm]
X_offset FALSE
Mod_return 1
Scans 5000
Total_scans 5000
=====
X_90_width 11.3[us]
X_acq_time 13.7534272[s]
X_offset 30.424272[us]
X_pulse 3.76666667[us]
Initial_wait 1[s]
Phase_preset 3[us]
Recvr_gain 30
Relaxation_delay 1[s]
Temp_get 20.4[dc]
Unblank_time 2[us]
=====

```

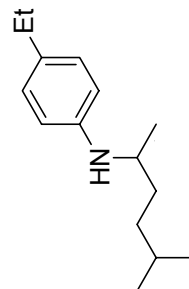

4n  
(Table 2, entry 13)

Data File C:\HPCHEM\1\DATA\MS000420.D  
080825-coa-04

Sample Name: Reacc 433f25

Chiralcel OD 100 5 250x 4.6 mm  
hexano/isopropanol 95/5  
flujo 1 ml/min  
UV 254 nm

```
=====
Injection Date   : 11/09/08 12:02:30 PM
Sample Name      : Reacc 433f25                Vial :    1
Acq. Operator    : 428
Method           : C:\HPCHEM\1\METHODS\QUIRAL.M
Last changed     : 11/09/08 11:09:31 AM by carmen
                  (modified after loading)
para Le legadec
=====
```

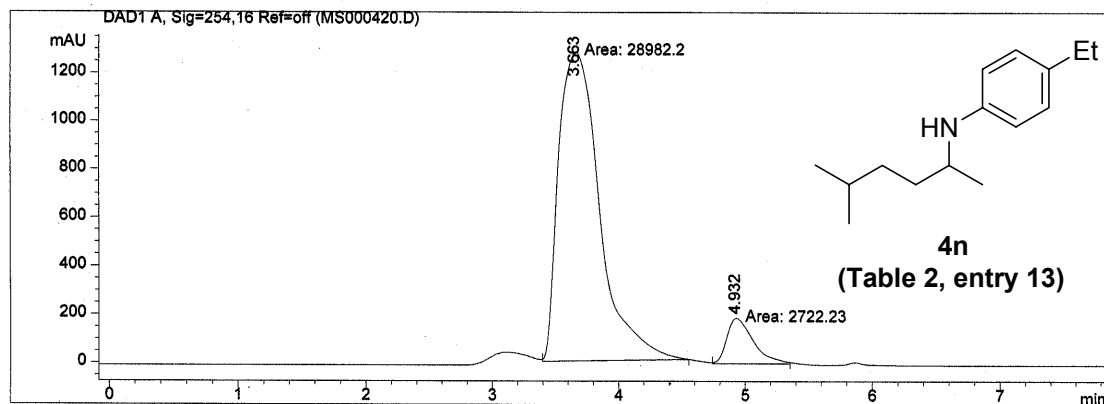

```
=====
Area Percent Report
=====
```

Sorted By : Signal  
Multiplier : 1.0000  
Dilution : 1.0000

Signal 1: DAD1 A, Sig=254,16 Ref=off  
Results obtained with enhanced integrator!

| Peak # | RetTime [min] | Type | Width [min] | Area [mAU*s] | Height [mAU] | Area %  |
|--------|---------------|------|-------------|--------------|--------------|---------|
| 1      | 3.663         | MM   | 0.3768      | 2.89822e4    | 1281.97351   | 91.4137 |
| 2      | 4.932         | MM   | 0.2406      | 2722.23267   | 188.55191    | 8.5863  |

Totals : 3.17044e4 1470.52542

```
=====
*** End of Report ***
=====
```

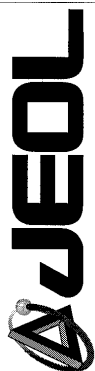

Reacc430F1719-1H-3.jdf  
= Cabreira  
= Single\_pulse.exp  
= Laura  
= CHLOROPOM-D  
23-SEP-2008 07:30:13  
3-SEP-2008 07:25:33  
3-SEP-2008 07:30:39  
= Single Pulse Experiment  
= 1D COMPLEX  
= 1H  
= 16384  
= [ppm]  
= Dimensions  
= Eclipse+ 300  
= DELTA\_NMR  
Spectrometer  
Data\_format  
Dim\_size  
Dim\_title  
Dim\_units  
Dimensions  
Spectrum  
Field\_strength  
X\_acq\_duration  
X\_domain  
X\_freq  
X\_offset  
X\_resolution  
X\_sweep  
X\_resolution  
X\_sweep  
Mod\_return  
Scans  
Total\_scans  
X\_90\_width  
X\_90\_time  
X\_angle  
X\_pulse  
X\_initial\_wait  
Phase\_preset  
Recvr\_gain  
Relaxation\_delay  
Temp\_set  
Unblank\_time

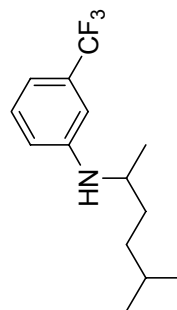

4o  
(Table 2, entry 14)

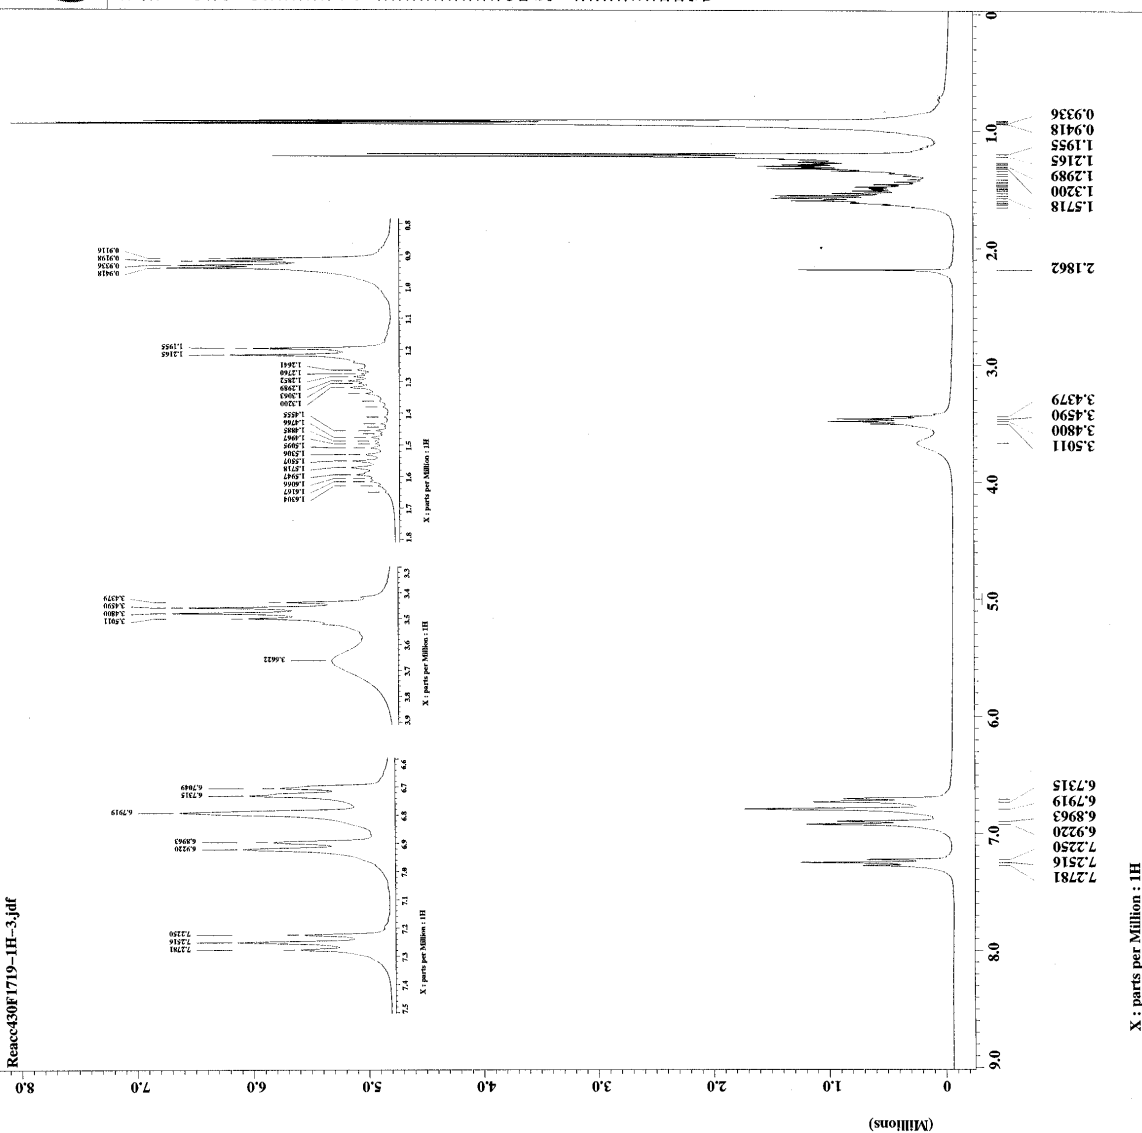

Data File C:\HPCHEM\1\DATA\MS000416.D  
080825-coa-05

Sample Name: Reacc 430

Chiralcel OD 100 5 250x 4.6 mm  
hexano/isopropanol 90/10  
flujo 1 ml/min  
UV 254 nm

=====  
Injection Date : 08/09/08 1:01:11 PM  
Sample Name : Reacc 430 Vial : 1  
Acq. Operator : carmen  
Acq. Method : C:\HPCHEM\1\METHODS\QUIRAL.M  
Last changed : 08/09/08 10:22:21 AM by carmen  
(modified after loading)  
Analysis Method : C:\HPCHEM\1\METHODS\QUIRAL.M  
Last changed : 12/09/08 12:43:24 PM by 428  
(modified after loading)  
para Le legadec  
=====

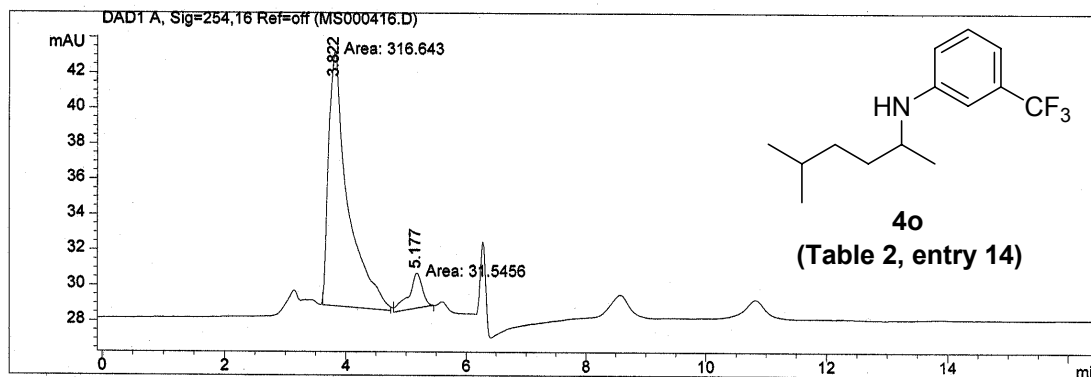

=====  
Area Percent Report  
=====

Sorted By : Signal  
Multiplier : 1.0000  
Dilution : 1.0000

Signal 1: DAD1 A, Sig=254,16 Ref=off  
Results obtained with enhanced integrator!

| Peak # | RetTime [min] | Type | Width [min] | Area [mAU*s] | Height [mAU] | Area %  |
|--------|---------------|------|-------------|--------------|--------------|---------|
| 1      | 3.773         | Fsho | 0.0000      | 0.00000      | 12.74802     | 0.0000  |
| 2      | 3.822         | MM   | 0.3657      | 316.64301    | 14.43213     | 90.9401 |
| 3      | 4.224         | Rsho | 0.0000      | 0.00000      | 3.26390      | 0.0000  |
| 4      | 4.455         | Rsho | 0.0000      | 0.00000      | 1.68889      | 0.0000  |
| 5      | 5.013         | Fsho | 0.0000      | 0.00000      | 5.51193e-1   | 0.0000  |
| 6      | 5.177         | MM   | 0.2628      | 31.54560     | 2.00050      | 9.0599  |

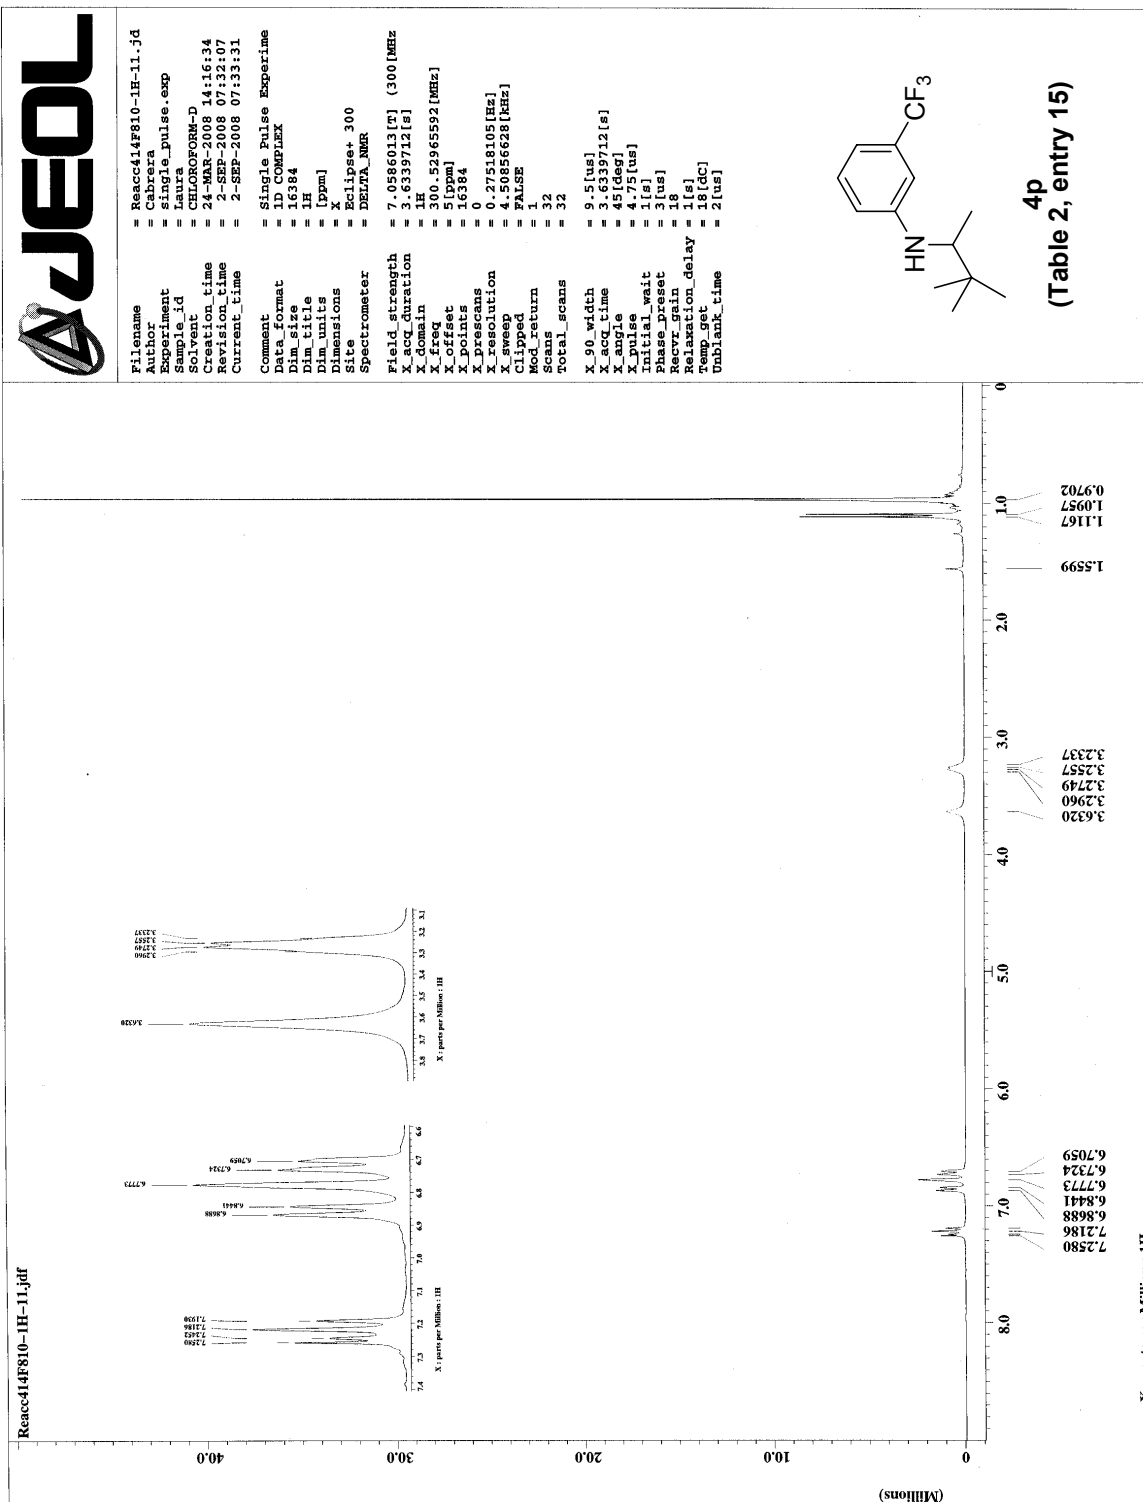

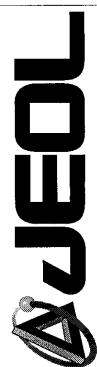

Filename = Reacc414F810-13C-6.Jd  
Author = Cabrera  
Experiment = single\_pulse\_dec  
Sample\_id = laura  
Solvent = CHLOROFORM-D  
Creation\_time = 24-MAR-2008 05:07:01  
Revision\_time = 24-MAR-2008 07:29:50  
Current\_time = 2-SEP-2008 07:30:43  
Comment = Single Pulse with Bro  
Data\_format = ID COMPLEX  
Dir\_size = 32768  
Dir\_title = 13C  
Dir\_units = [ppm]  
Dimensions = 2  
Slices = 300  
Spectrometer = DELTA\_NMR  
Field\_strength = 7.0586013[T] (300[Mhz]  
X\_acq\_duration = 1.7334272[s]  
X\_domain = 13C  
X\_freq = 75.56823426[Mhz]  
X\_offset = 120.0000000[ppm]  
X\_points = 32768  
X\_prescans = 4  
X\_resolution = 0.57689184[Hz]  
X\_sweep = 18.90359168[Mhz]  
Irr\_domain = 1H  
Irr\_freq = 300.52965592[Mhz]  
C1r\_offset = 21.0000000[ppm]  
C1r\_prescans = 1  
Mod\_return = 2375  
Total\_scans = 2375  
X\_90\_width = 11.3[us]  
X\_acq\_time = 1.7334272[s]  
X\_angle = 30[deg]  
X\_delay = 3.76666667[us]  
Initial\_wait = 1[s]  
Phase\_preset = 3[us]  
Recvr\_gain = 30  
Relaxation\_delay = 1[s]  
Temp\_get = 19.9[dc]  
Unblank\_time = 2[us]

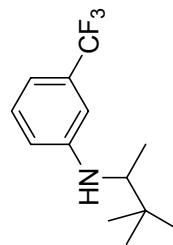

4p  
(Table 2, entry 15)

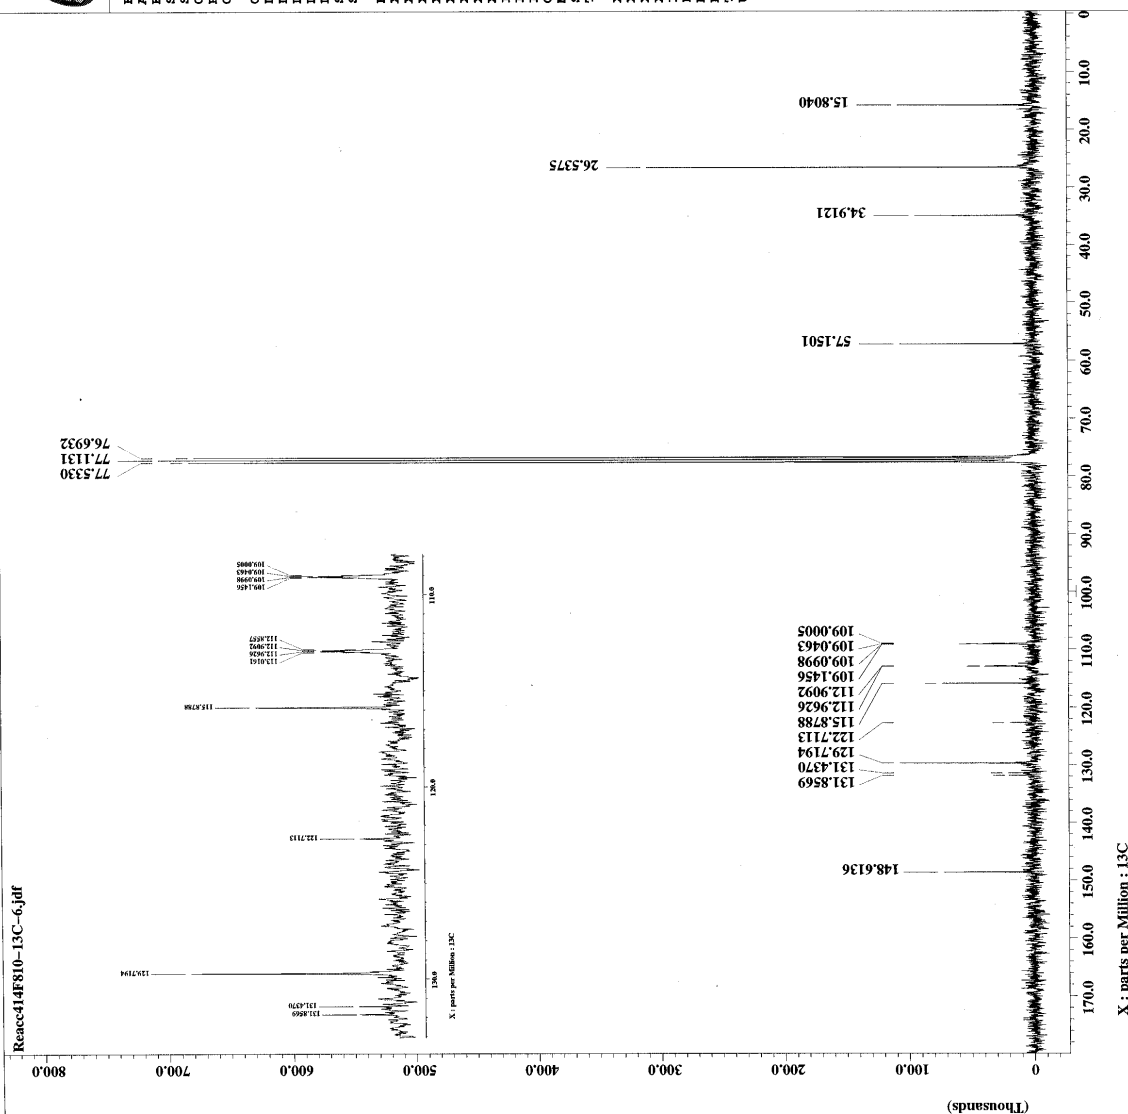

Data File D:\HPLC\HPCHEM\1\DATA\OSCAR\MS000232.D

Sample Name: Reacc414F812

Chiralcel OD 25x 4.6 mm  
hexano/isopropanol 92/8  
flujo 1 ml/min  
UV 210

=====  
Injection Date : 17/06/08 10:15:40 AM  
Sample Name : Reacc414F812 Vial : 1  
Acq. Operator : carmen  
Acq. Method : C:\HPCHEM\1\METHODS\QUIRAL.M  
Last changed : 17/06/08 9:44:12 AM by carmen  
(modified after loading)  
Analysis Method : C:\HPCHEM\1\METHODS\QUIRAL.M  
Last changed : 12/09/08 12:43:24 PM by 428  
(modified after loading)

para Le legadec

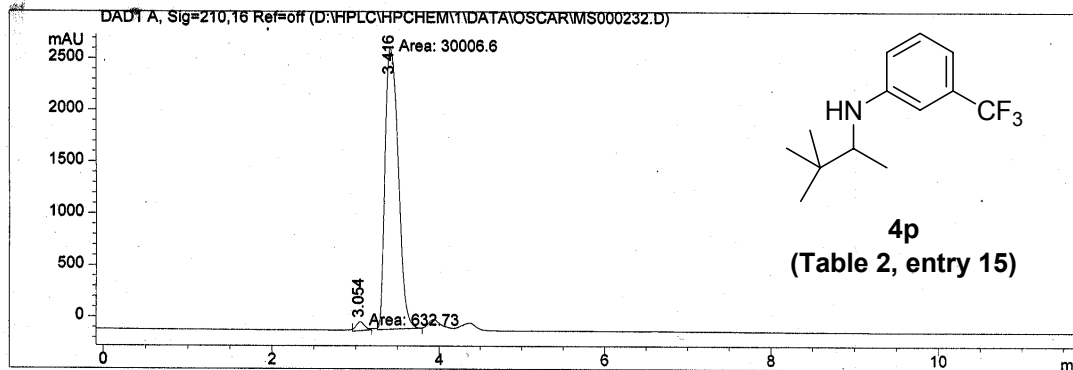

=====  
Area Percent Report  
=====

Sorted By : Signal  
Multiplier : 1.0000  
Dilution : 1.0000

Signal 1: DAD1 A, Sig=210,16 Ref=off  
Results obtained with enhanced integrator!

| Peak # | RetTime [min] | Type | Width [min] | Area [mAU*s] | Height [mAU] | Area %  |
|--------|---------------|------|-------------|--------------|--------------|---------|
| 1      | 3.054         | MM   | 0.1197      | 632.72961    | 88.13225     | 2.0651  |
| 2      | 3.416         | MM   | 0.1834      | 3.00066e4    | 2726.47974   | 97.9349 |

Totals : 3.06393e4 2814.61198

=====  
\*\*\* End of Report \*\*\*

U.N.A.M. Instituto de Química ICH  
 Dr. A. Cabrera / Laura R.P.  
 Clave: Reacc. 301-2  
 Disolvente: CDCl<sub>3</sub>  
 Experimento: 1H  
 Mariani nova 500 MHz (G)  
 No. de Registro 2863  
 30-08-08

File: std1h

Pulse Sequence: s2pul

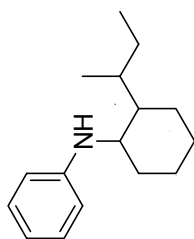

**4q**  
 (Table 2, entry 16)  
 With [(R)-BINAP]PdBr<sub>2</sub>

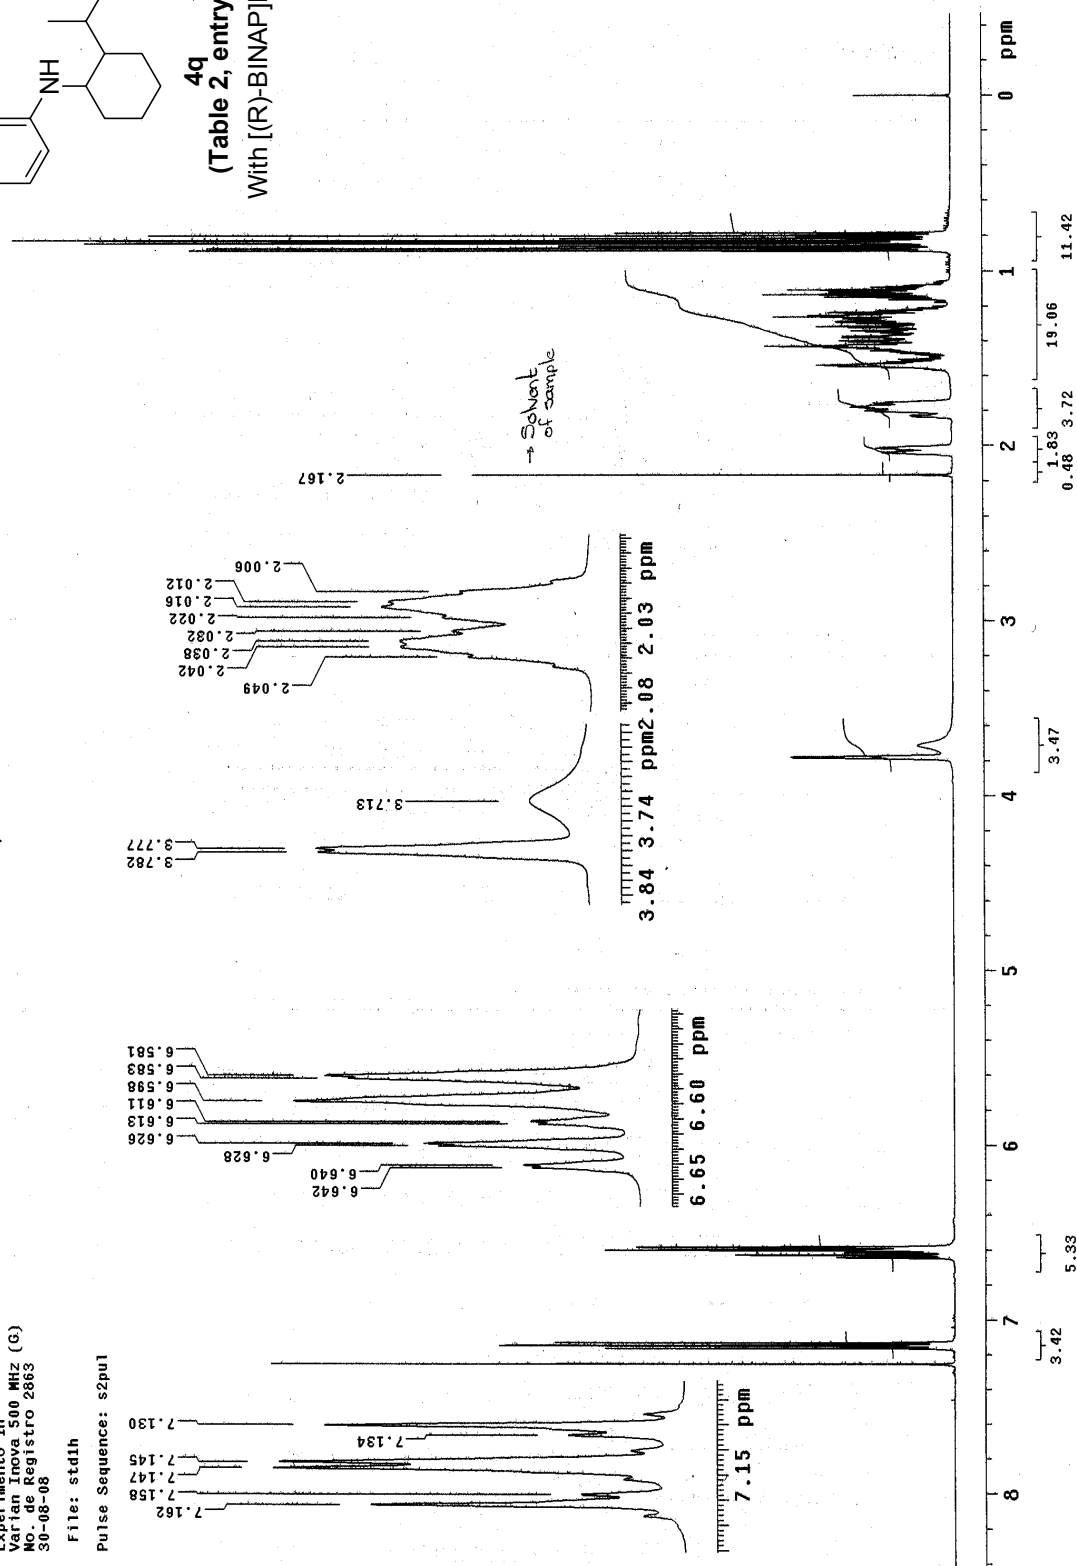

U.N.A.M. Instituto de Química ICH  
 Dr. A. Cabrera / Laura R.P.  
 Referenc. 3012  
 Disolvente: CDCl<sub>3</sub>  
 Experimento: 13C  
 Varian Inova 125 MHz (G)  
 No. de Registro 2863  
 30-08-08

File: 13C

Pulse Sequence: szpul

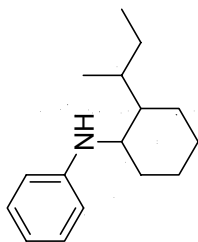

**4q**  
 (Table 2, entry 16)  
 With [(R)-BINAP]PdBr<sub>2</sub>

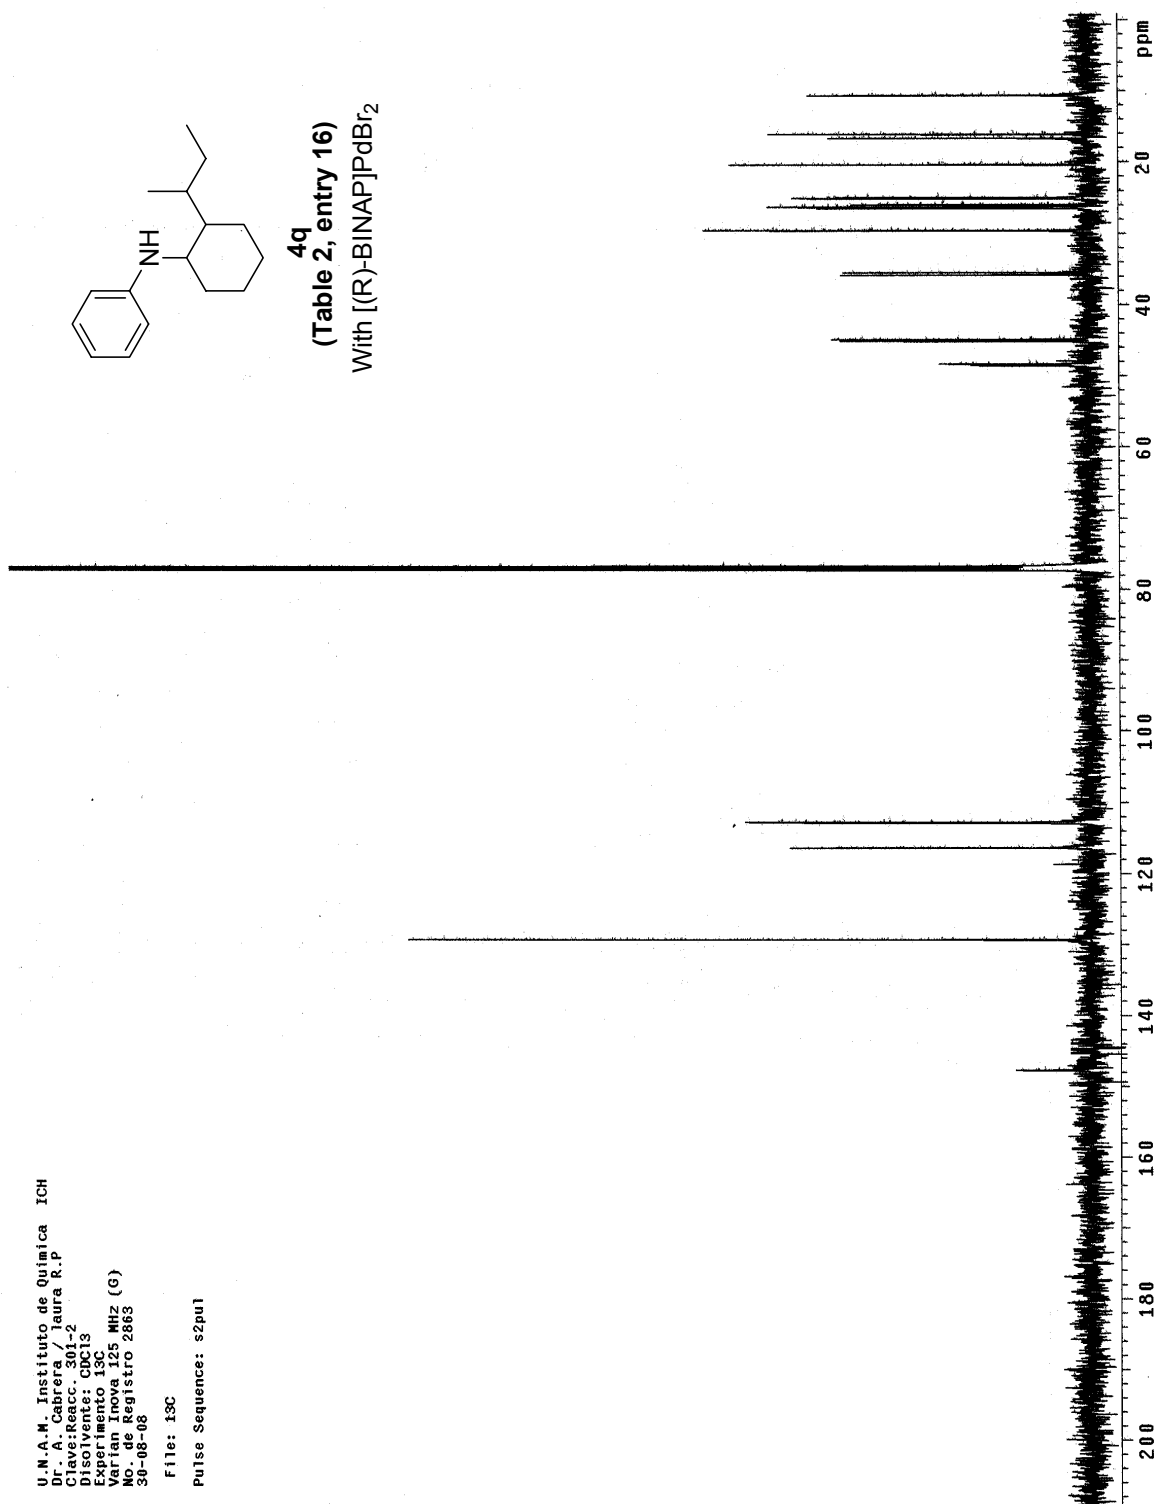

U.N.A.M. Instituto de Química ICH  
 Dr. A. Cabrera / Laura R.P.  
 Clave:Reacc. 301-2  
 Disolvente: CDCl<sub>3</sub>  
 Experimento 13C  
 Varian Inova 125 MHz (G)  
 No. de Registro 2863  
 30-08-08

File: 13C

Pulse Sequence: s2pul

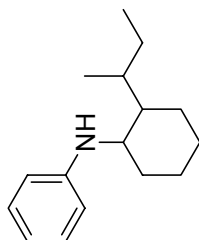

**4q**  
**(Table 2, entry 16)**  
 With [(R)-BINAP]PdBr<sub>2</sub>

Expansions of <sup>13</sup>C NMR

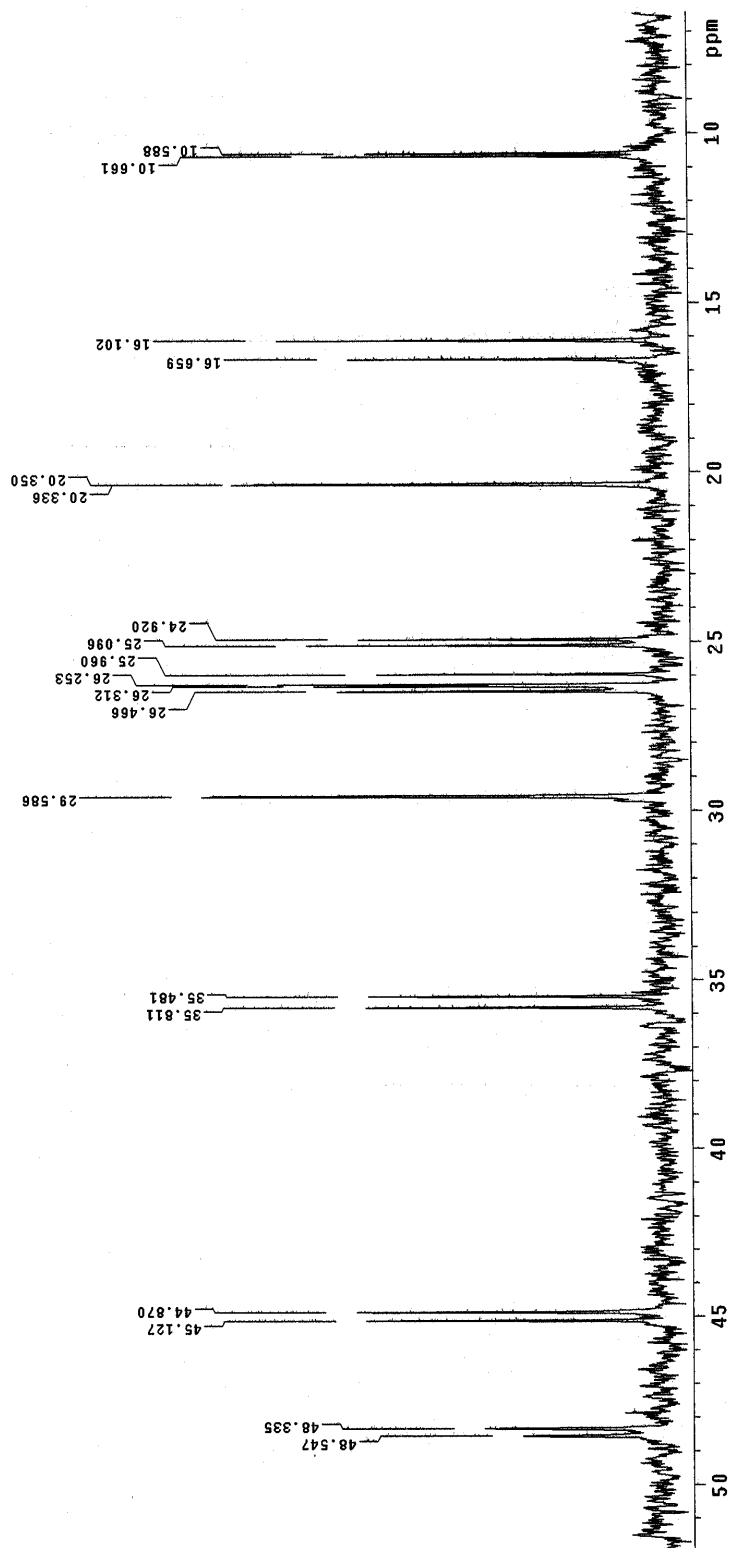

U.N.A.M. Instituto de Química ICH  
 Dr. A. Cabrera  
 Crea: Reac. 3012  
 Dirección: CD013  
 Experimento HSQC  
 Varian Inova 500 MHz (G)  
 No. de Registro 2863  
 30-08-08

File: gHSQC

Pulse Sequence: gHSQC

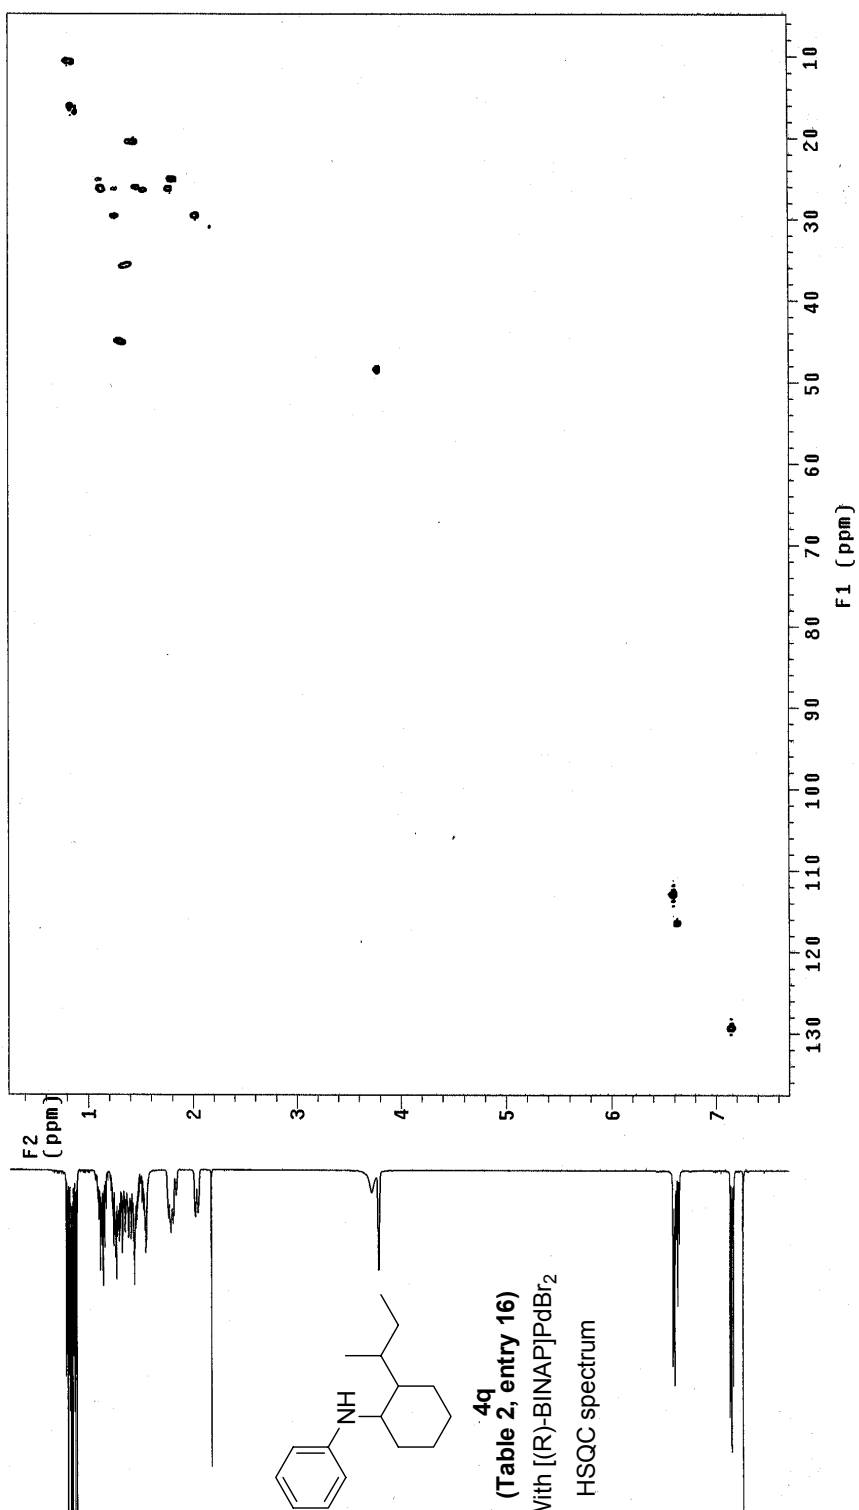

U.N.A.M. Instituto de Química ICH  
 Dr. Catherine Laura R.P.  
 Clave: Reacc 301-2  
 Disolvente: CDCl<sub>3</sub>  
 Experimento: NOESY  
 Varian Inova 500 MHz (G)  
 No. de Registro 2863  
 30-08-08  
 Pulse Sequence: NOESY

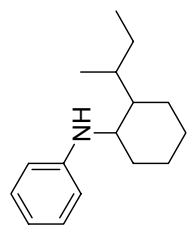

**4q**  
 (Table 2, entry 16)  
 With [(R)-BINAP]PdBr<sub>2</sub>  
 NOESY spectrum

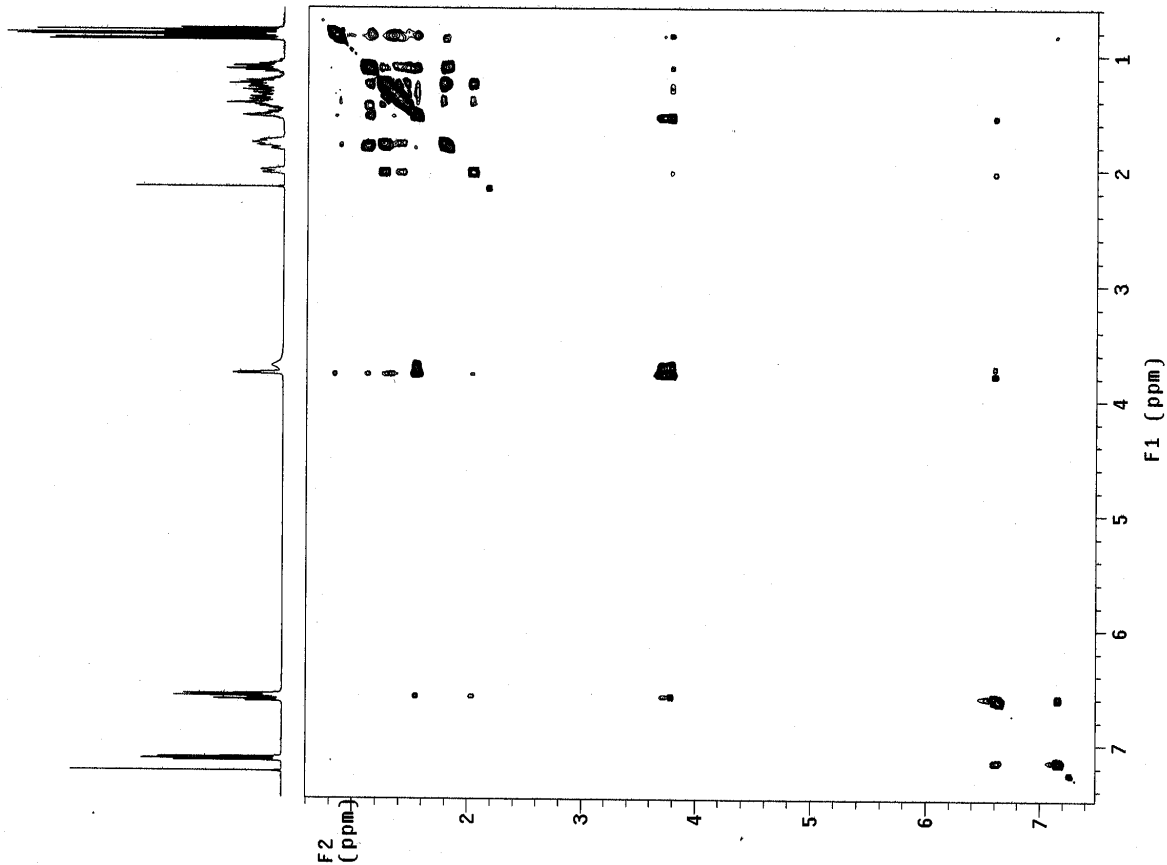

[ TIC ]

Data : Dr-Cabrera-Armando-091  
 Sample: 1742 G Reacc 306 JeolAX505HA  
 Note : 5 horas  
 Inlet : GC  
 Ion Species : Normal Ion

Date : 06-Aug-120 09:34  
 Ion Mode : EI+  
 TIC Range : m/z 10 to 650

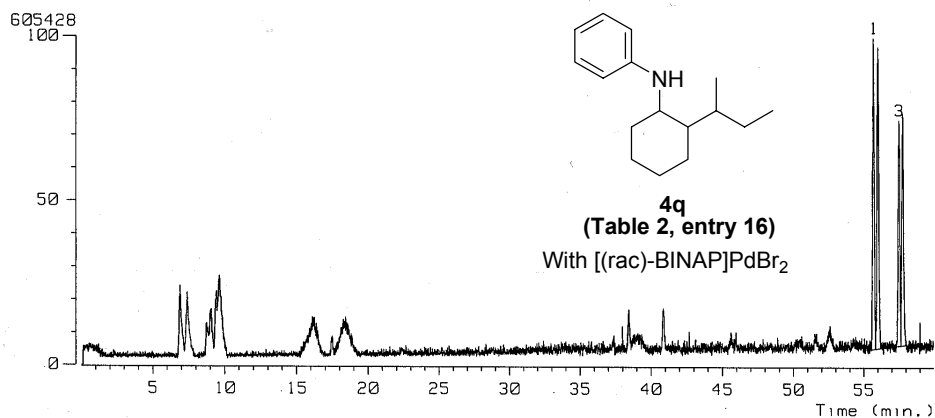

| No. | RT[min] | Area   | Area% | Height | Height% | Width[sec] | INTEG |
|-----|---------|--------|-------|--------|---------|------------|-------|
| 1   | 55.71   | 436.93 | 27.30 | 54.64  | 29.08   | 7.51       | BV    |
| 2   | 56.05   | 457.54 | 28.59 | 52.97  | 28.19   | 8.11       | VV    |
| 3   | 57.53   | 346.95 | 21.68 | 39.64  | 21.09   | 8.22       | VV    |
| 4   | 57.79   | 358.96 | 22.43 | 40.68  | 21.64   | 8.29       | VB    |

[ TIC ]

Data : Dr-Cabrera-Armando-091 Date : 06-Aug-120 09:34  
 Sample: 1742 G Reacc 306 JeolAX505HA  
 Note : 5 horas  
 Inlet : GC  
 Ion Species : Normal Ion [MF-Linear]  
 TIC Range : m/z 10 to 650

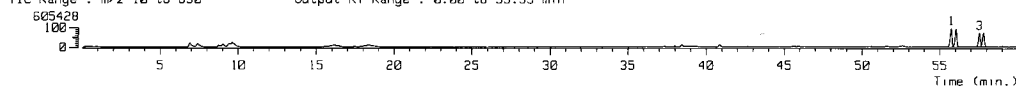

[ Mass Spectrum ]

RT : 55.71 min Scan# : 4325-4329-4505 Temp : 0.0 deg.C  
 Ion Mode : EI+ Int. : 16.04

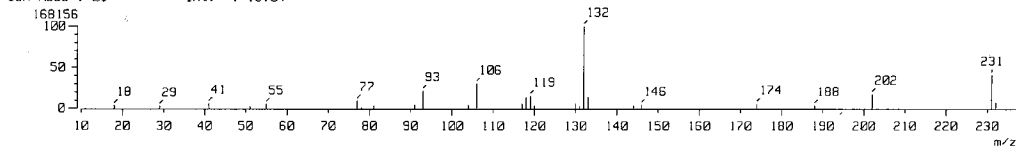

[ Mass Spectrum ]

RT : 56.05 min Scan# : 4351-4355-4505 Temp : 0.0 deg.C  
 Ion Mode : EI+ Int. : 15.20

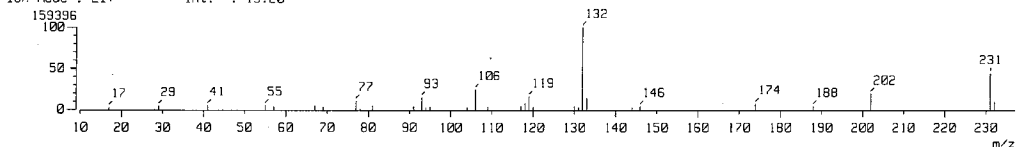

[ Mass Spectrum ]

RT : 57.53 min Scan# : 4466-4469-4505 Temp : 0.0 deg.C  
 Ion Mode : EI+ Int. : 11.91

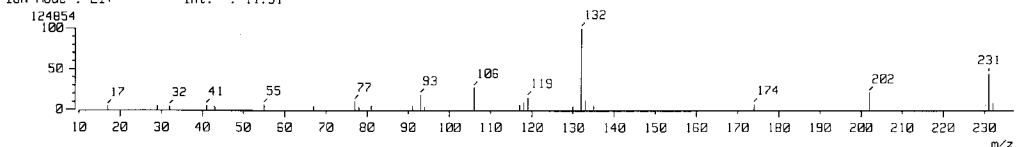

[ Mass Spectrum ]

RT : 57.79 min Scan# : 4486-4489-4505 Temp : 0.0 deg.C  
 Ion Mode : EI+ Int. : 11.36

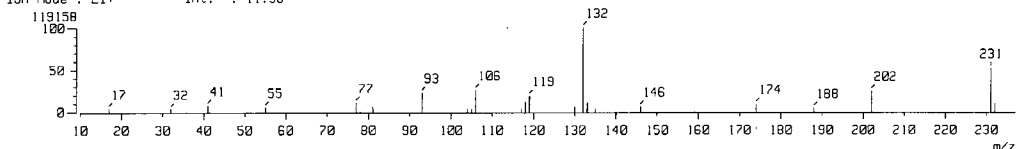

[ TIC ]

Data : Dr-Cabrera-Armando-095  
 Sample: 1747 G Reacc 301 JeolAX505HA  
 Note : 5 horas  
 Inlet : GC  
 Ion Species : Normal Ion

Date : 07-Aug-120 11:43  
 Ion Mode : EI+  
 TIC Range : m/z 10 to 650

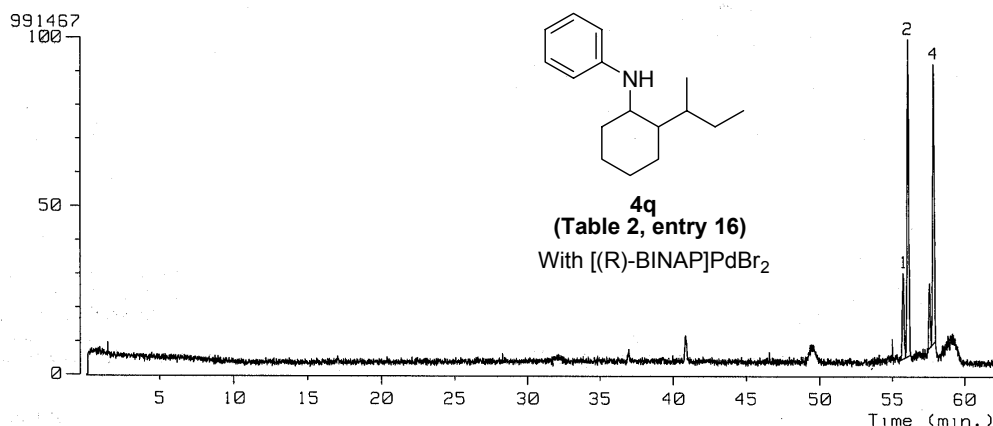

| No. | RT [min] | Area   | Area% | Height | Height% | Width [sec] | INTEG |
|-----|----------|--------|-------|--------|---------|-------------|-------|
| 1   | 55.75    | 218.04 | 13.06 | 24.56  | 11.67   | 8.34        | BV    |
| 2   | 56.10    | 714.49 | 42.79 | 89.17  | 42.38   | 7.52        | VB    |
| 3   | 57.57    | 126.39 | 7.57  | 18.18  | 8.64    | 6.53        | BV    |
| 4   | 57.86    | 611.02 | 36.59 | 78.51  | 37.31   | 7.31        | VB    |

[ TIC ]  
 Data : Dr-Cabrera-Armando-095 Date : 07-Aug-120 11:43  
 Sample: 1747 G Reacc 301 JeolAX505HA  
 Note : 5 horas  
 Inlet : GC Ion Mode : EI+  
 Ion Species : Normal Ion [MF-Linear]  
 TIC Range : m/z 10 to 650 Output RT Range : 0.00 to 62.01 min

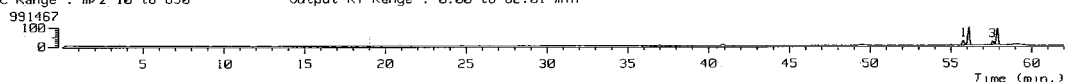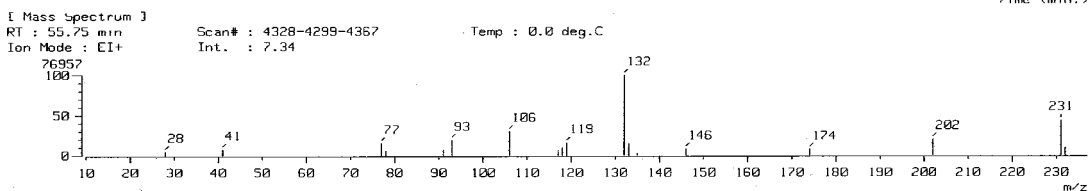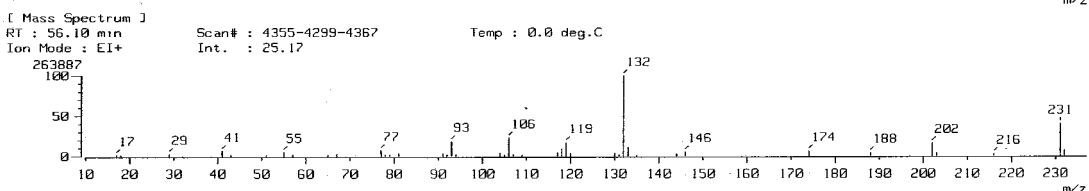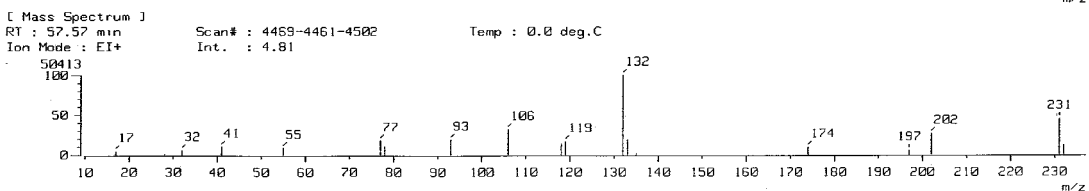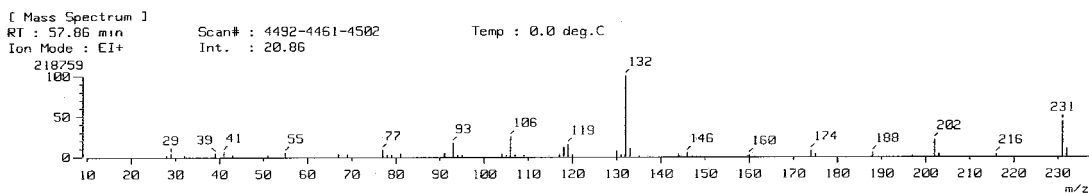

[ TIC ]

Data : Dr-Cabrera-Armando-114 Date : 22-Aug-120 09:28

Sample: 1914 G Reacc 301-3 JeolAX505HA

Note : 5 horas

Inlet : GC

Ion Species : Normal Ion

Ion Mode : EI+

TIC Range : m/z 10 to 650

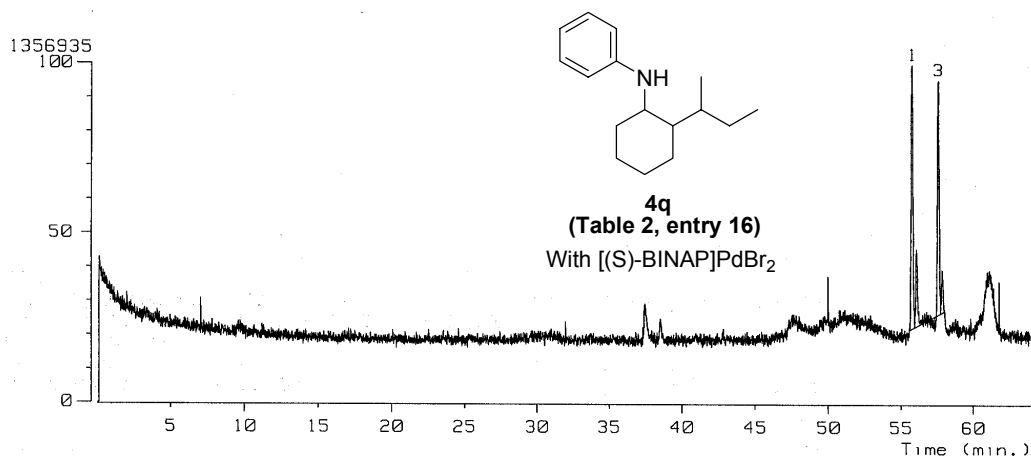

| No. | RT[min] | Area   | Area% | Height | Height% | Width[sec] | INTEG |
|-----|---------|--------|-------|--------|---------|------------|-------|
| 1   | 55.79   | 854.25 | 44.10 | 100.62 | 42.65   | 7.97       | BV    |
| 2   | 56.07   | 234.92 | 12.13 | 29.48  | 12.49   | 7.48       | VV    |
| 3   | 57.62   | 716.21 | 36.97 | 89.52  | 37.94   | 7.51       | VV    |
| 4   | 57.84   | 131.84 | 6.81  | 16.32  | 6.92    | 7.59       | VB    |

[ TIC ]

Data : Dr-Cabrera-Armando-114 Date : 22-Aug-120 09:28  
 Sample: 1914 G Reacc 301-3 JeolAX505HA  
 Note : 5 horas  
 Inlet : GC  
 Ion Species : Normal Ion [MF-Linear]  
 Ion Mode : EI+  
 TIC Range : m/z 10 to 650  
 Output RT Range : 0.00 to 63.99 min

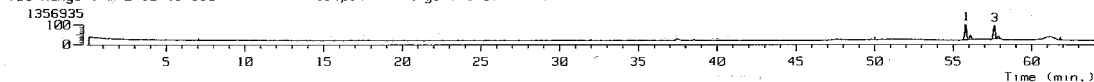

[ Mass Spectrum ]

RT : 55.79 min Scan# : 4331-4317-4505 Temp : 0.0 deg.C  
 Ion Mode : EI+ Int. : 28.38

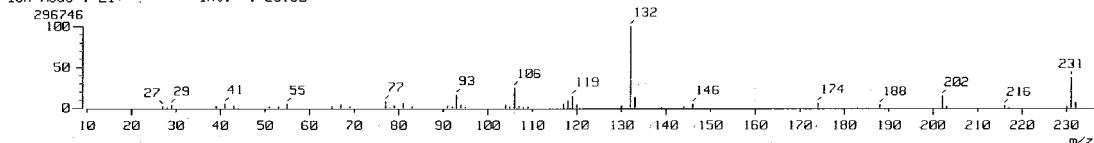

[ Mass Spectrum ]

RT : 56.07 min Scan# : 4353-4317-4505 Temp : 0.0 deg.C  
 Ion Mode : EI+ Int. : 7.22

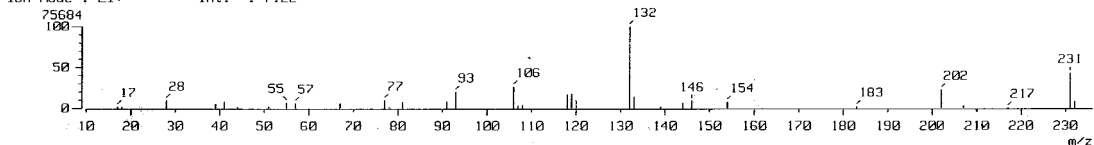

[ Mass Spectrum ]

RT : 57.62 min Scan# : 4473-4317-4505 Temp : 0.0 deg.C  
 Ion Mode : EI+ Int. : 26.26

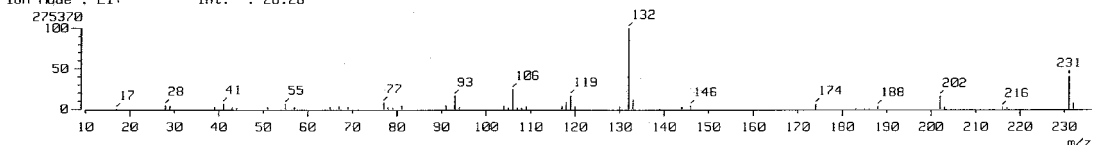

[ Mass Spectrum ]

RT : 57.84 min Scan# : 4498-4317-4505 Temp : 0.0 deg.C  
 Ion Mode : EI+ Int. : 4.78

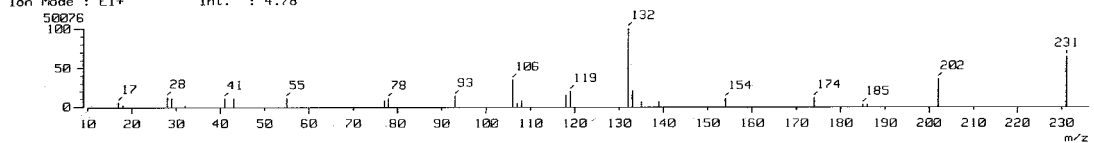

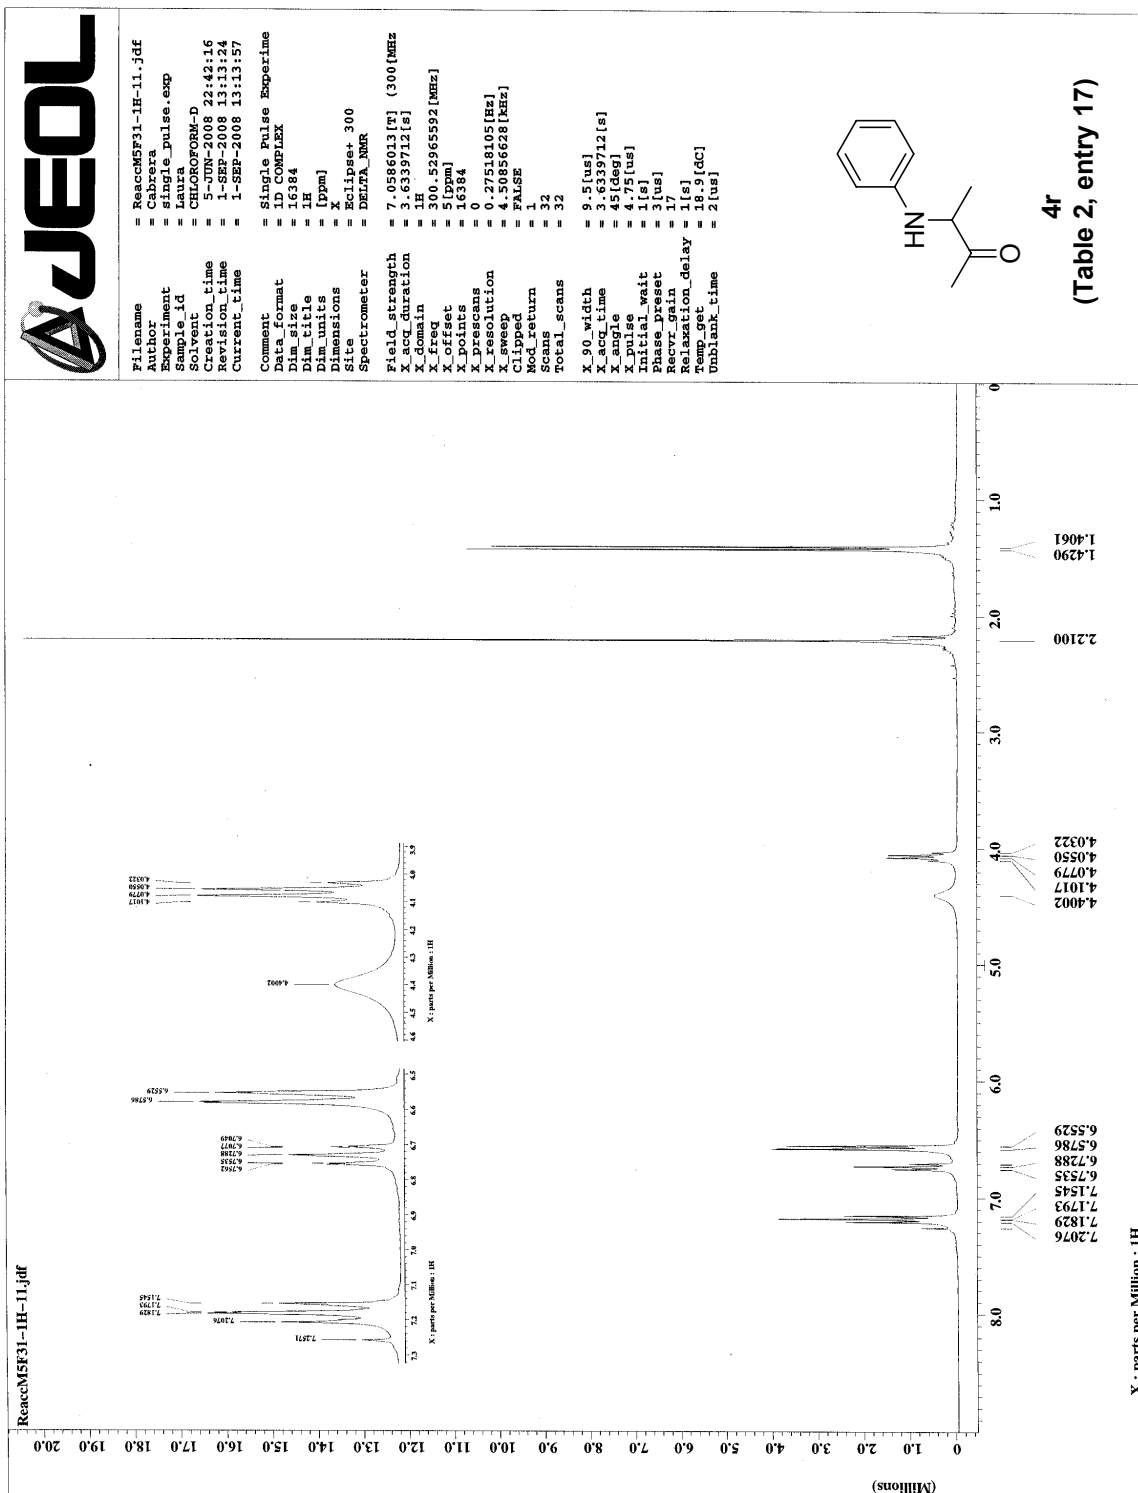

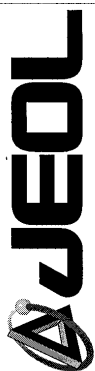

Filename = ReaccM5F31-13C-3.jdf  
 Author = Cabrera  
 Experiment = Single\_pulse\_dec  
 Sample\_id = 13C  
 Solvent = CHLOROFORM-D  
 Creation\_time = 4-JUN-2008 03:11:18  
 Revision\_time = 1-SEP-2008 13:15:15  
 Current\_time = 1-SEP-2008 13:15:24  
 Comment = Single Pulse with Bro  
 Data\_format = ID COMPLEX  
 Dim\_size = 32768  
 Dim\_time = 130  
 Dim\_units = [ppm]  
 Dimensions = X  
 Site = Eclipse+ 300  
 Spectrometer = DELTA\_NMR  
 Field\_strength = 7.0586013[T] (300[MHz]  
 X\_acq\_duration = 1.734272[s]  
 X\_domain = 130  
 X\_freq = 75.56823426[MHz]  
 X\_offset = 100[ppm]  
 X\_points = 32768  
 X\_prescans = 4  
 X\_resolution = 0.57689184[Hz]  
 X\_sweep = 18.90359168[MHz]  
 Irr\_domain = 30.52965592[MHz]  
 Irr\_freq = 50[ppm]  
 Irr\_offset = FALSE  
 Clipped = 1  
 Mod\_return = 1725  
 Total\_scans = 1725  
 X\_90\_width = 11.3[us]  
 X\_acq\_time = 1.734272[s]  
 X\_echo = 3.76866667[us]  
 X\_pulse = 1[s]  
 Initial\_wait = 3[us]  
 Phase\_preset = 30  
 Recvr\_gain = 20.8[dB]  
 Relaxation\_delay = 1[s]  
 Temp\_get = 20.8[dC]  
 Unblank\_time = 2[us]

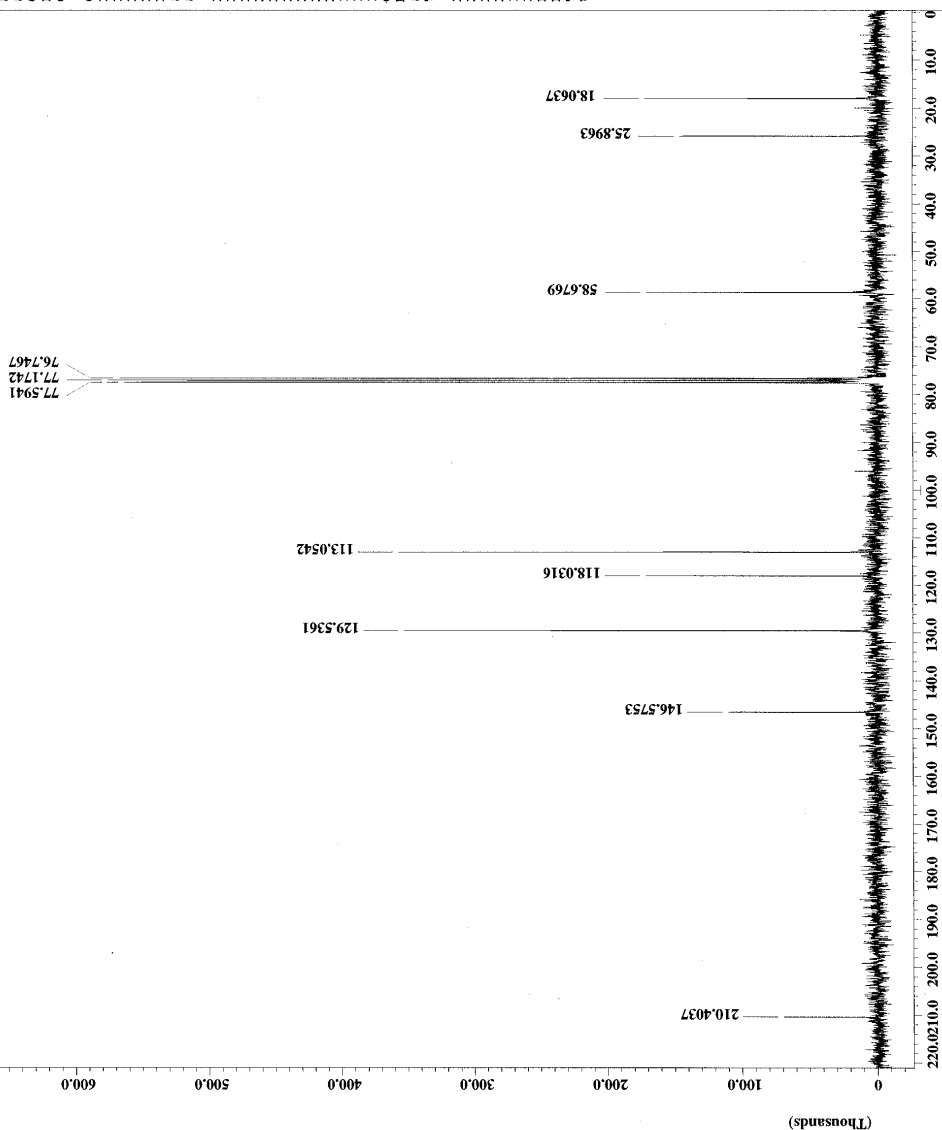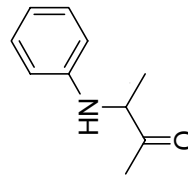

4r

(Table 2, entry 17)

X : parts per Million : 13C

Data File D:\HPLC\HPCHEM\1\DATA\OSCAR\MS000411.D  
080825-coa-01

Sample Name: Reacc H5F31

Chiralcel OD 100 5 250x 4.6 mm  
hexano/isopropanol 90/10  
flujo 1 ml/min  
UV 254 nm

=====  
Injection Date : 04/09/08 6:16:33 PM  
Sample Name : Reacc H5F31 Vial : 1  
Acq. Operator : carmen  
Acq. Method : C:\HPCHEM\1\METHODS\QUIRAL.M  
Last changed : 04/09/08 5:41:33 PM by carmen  
(modified after loading)  
Analysis Method : C:\HPCHEM\1\METHODS\QUIRAL.M  
Last changed : 11/09/08 11:09:31 AM by carmen  
(modified after loading)  
para Le legadec  
=====

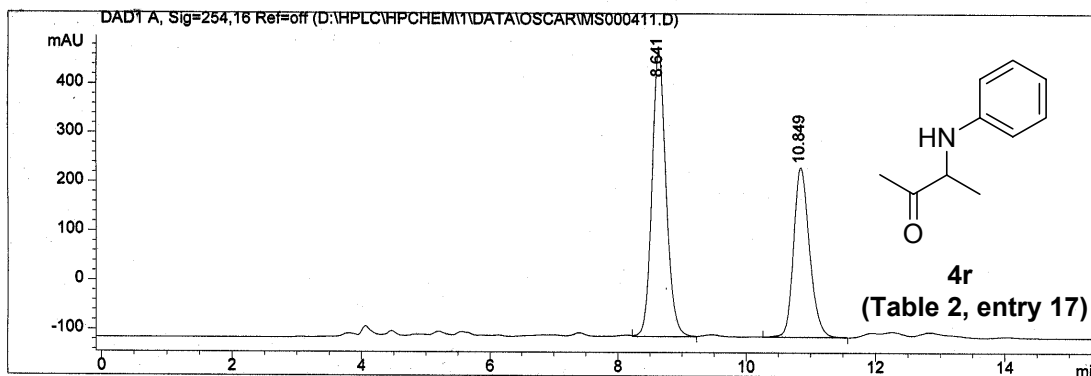

=====  
Area Percent Report  
=====

Sorted By : Signal  
Multiplier : 1.0000  
Dilution : 1.0000

Signal 1: DAD1 A, Sig=254,16 Ref=off  
Results obtained with enhanced integrator!

| Peak # | RetTime [min] | Type | Width [min] | Area [mAU*s] | Height [mAU] | Area %  |
|--------|---------------|------|-------------|--------------|--------------|---------|
| 1      | 8.641         | VV   | 0.2346      | 8898.23145   | 581.41614    | 59.9473 |
| 2      | 10.849        | VP   | 0.2608      | 5945.19336   | 345.46396    | 40.0527 |

Totals : 1.48434e4 926.88010 cc = 19.89 ~ 20%

=====  
\*\*\* End of Report \*\*\*  
=====

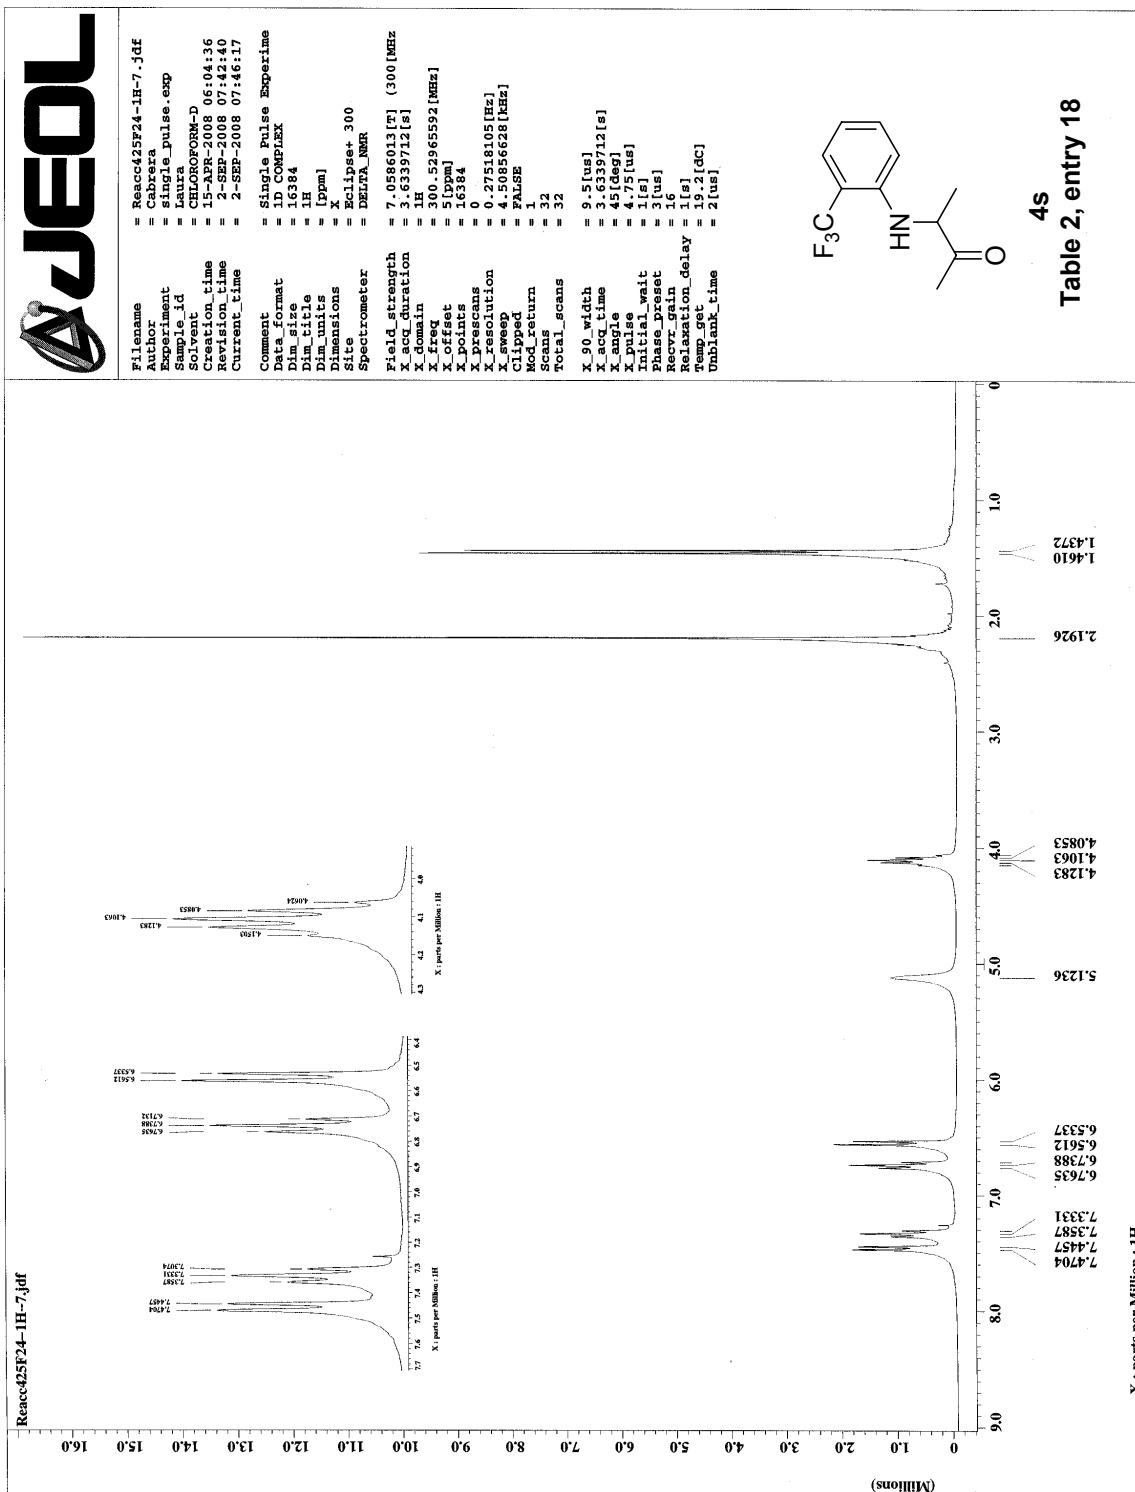

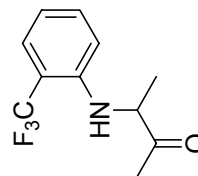

**4s**  
**Table 2, entry 18**

UNAM, INSTITUTO DE QUIMICA, apg  
 Dr. Armando Cabrera / Laura R.P.  
 Clave: Reacc. 332 F24  
 Disolvente: CDCl<sub>3</sub>  
 Hidrogeno-1  
 Eclipse 300 MHz Jeol (E)  
 20-02-08

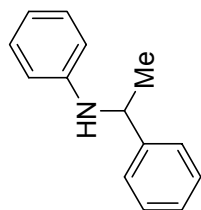

**6a**  
 (Table 3, entry 1)

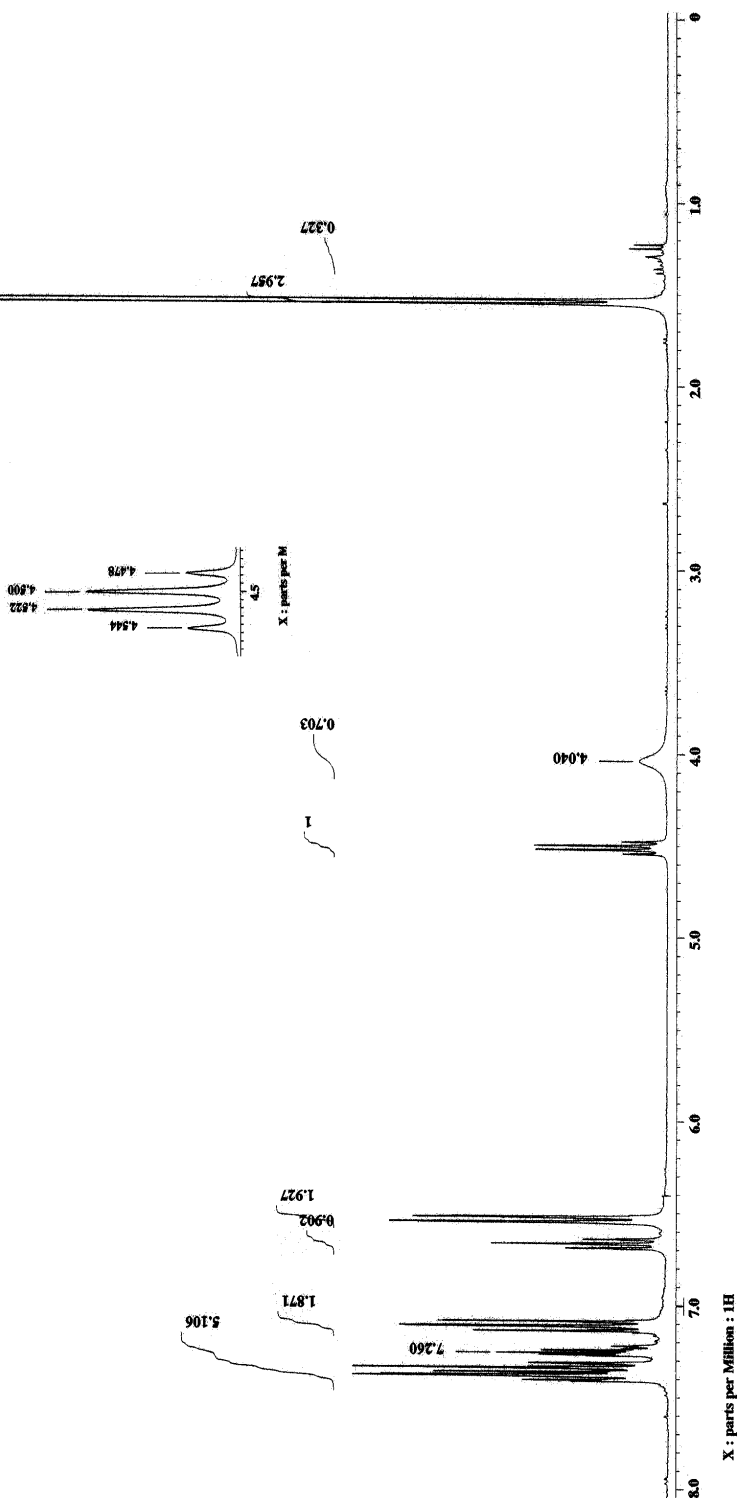

UNAM, INSTITUTO DE QUIMICA,  
 Dr. Armando Cabrera / Laura R.P.  
 Clave: Reacc. 332 F24  
 Disolvente: CDCl<sub>3</sub>  
 Carbono-13  
 Eclipse: 300 MHz Jeol (E)  
 20-02-08  
 No. Reg. 0634

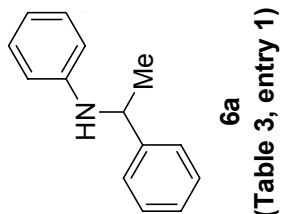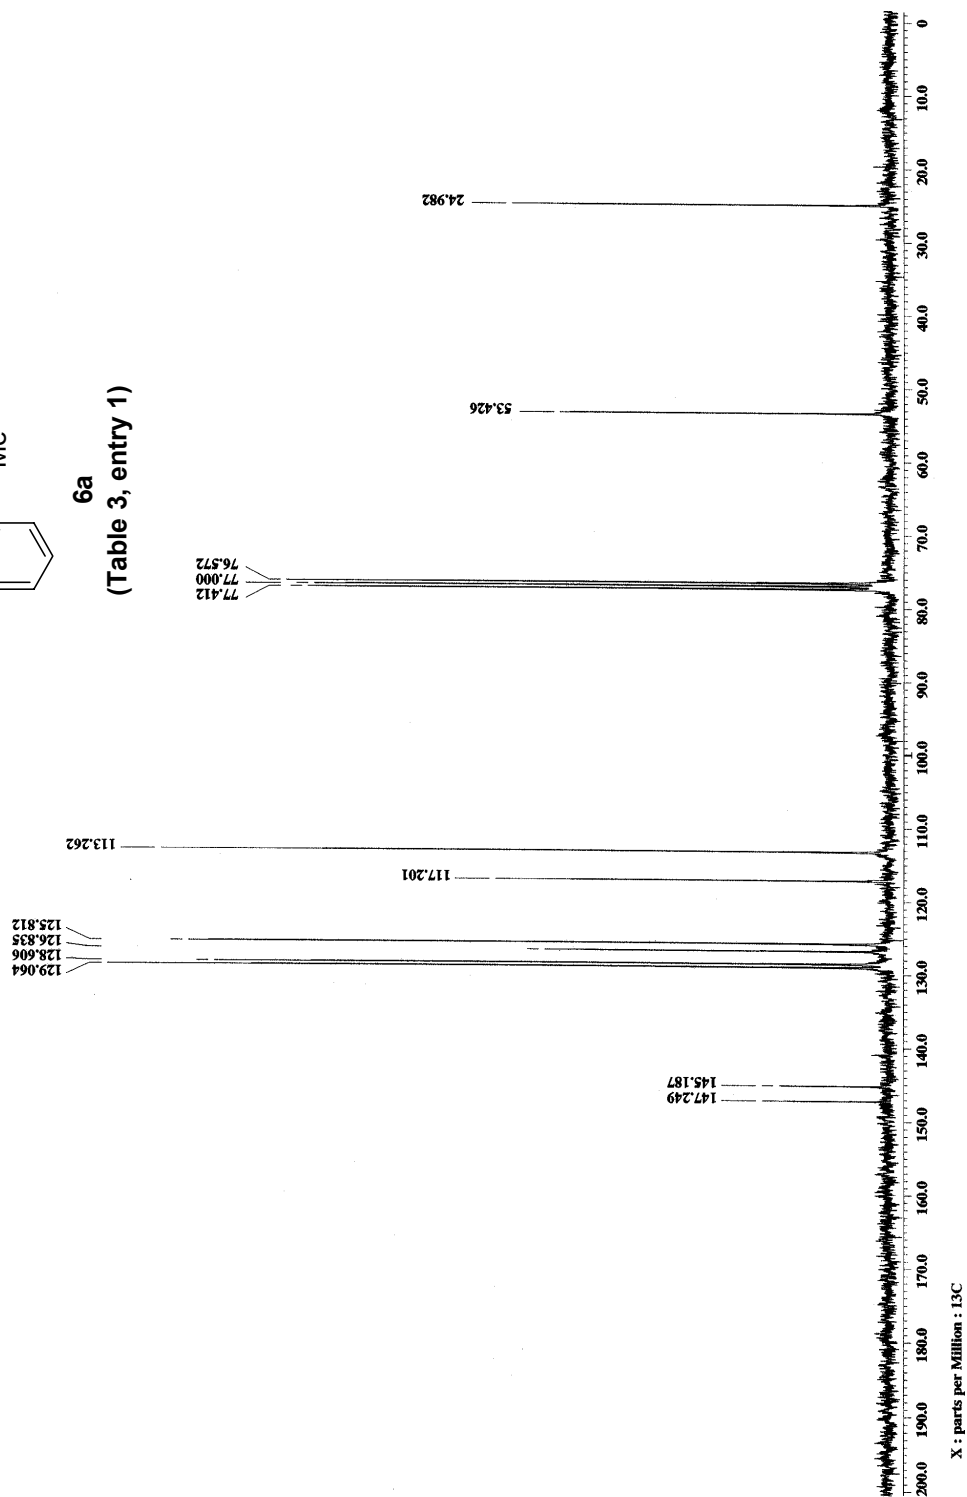

Reacc332  
080619-coa-04

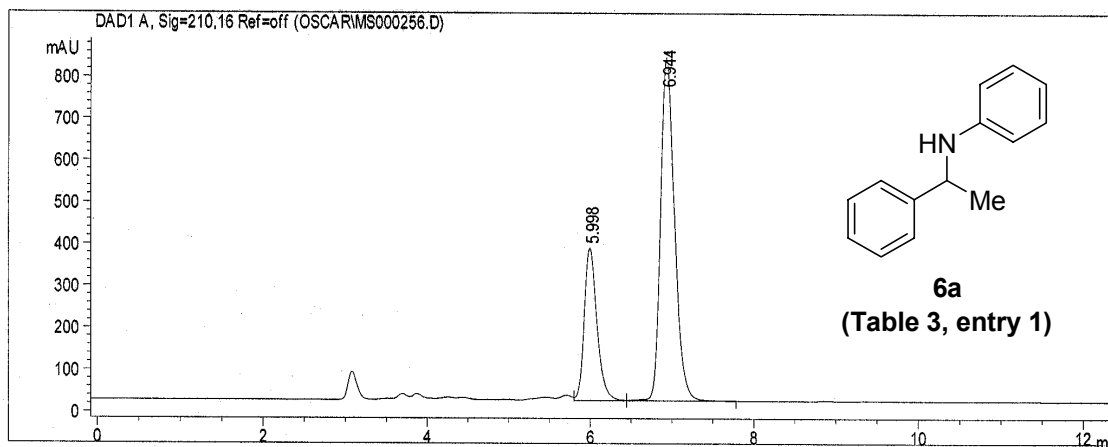

Data File C:\HPCHEM\1\DATA\OSCAR\MS000256.D Sample Name: Reacc332  
HPLC IQ 20/06/08 2:39:48 PM carmen  
Chiralcel OD 25x 4.6 mm  
hexano/isopropanol 92/8  
flujo 1 ml/min  
UV 210

=====

Injection Date : 20/06/08 11:53:01 AM  
Sample Name : Reacc332 Vial : 1  
Acq. Operator : carmen  
Acq. Method : C:\HPCHEM\1\METHODS\QUIRAL.M  
Last changed : 20/06/08 9:08:55 AM by carmen  
(modified after loading)  
Analysis Method : C:\HPCHEM\1\METHODS\QUIRAL.M  
Last changed : 20/06/08 12:36:04 PM by carmen  
(modified after loading)  
para Le legadec

=====

Area Percent Report

=====

Sorted By : Signal  
Multiplier : 1.0000  
Dilution : 1.0000

Signal 1: DAD1 A, Sig=210,16 Ref=off  
Results obtained with enhanced integrator!

| Peak #   | RetTime [min] | Type | Width [min] | Area [mAU*s] | Height [mAU] | Area %  |
|----------|---------------|------|-------------|--------------|--------------|---------|
| 1        | 5.998         | VV   | 0.1615      | 3923.38159   | 364.84668    | 28.6245 |
| 2        | 6.944         | VP   | 0.1830      | 9782.97656   | 821.06763    | 71.3755 |
| Totals : |               |      |             | 1.37064e4    | 1185.91431   |         |

Instituto de Quimica UNAM MZ  
 Dr. Armando Cabrera/Laura R.  
 Clave: Reacc 331F25-II  
 COD13  
 Bruker Avance- 300MHz-F  
 No. de registro: 828  
 JH  
 5-03-08

7.29414  
 7.26698  
 7.26000  
 7.16263  
 6.94606  
 6.94387  
 6.91737  
 6.91519  
 6.48421  
 6.45591

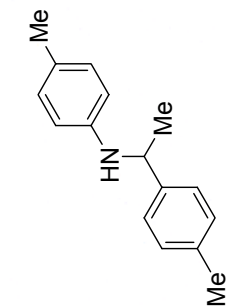

2.34810  
 2.21771  
 2.19592

1.52680  
 1.50445

(Table 3, entry 2)

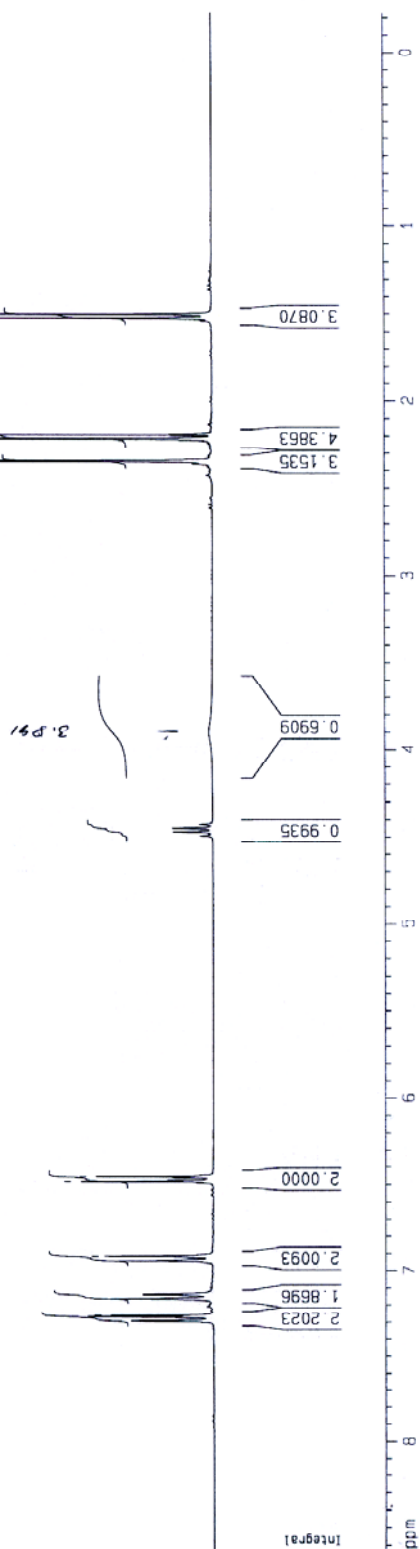

Instituto de Química UNAM MZ  
 Dr. Armando Cabrera/Laura R.  
 Clave: Reacc 331F25-II  
 CDC13  
 Bruker Avance- 300MHz-F  
 No. de registro: 828  
 13C  
 5-03-08

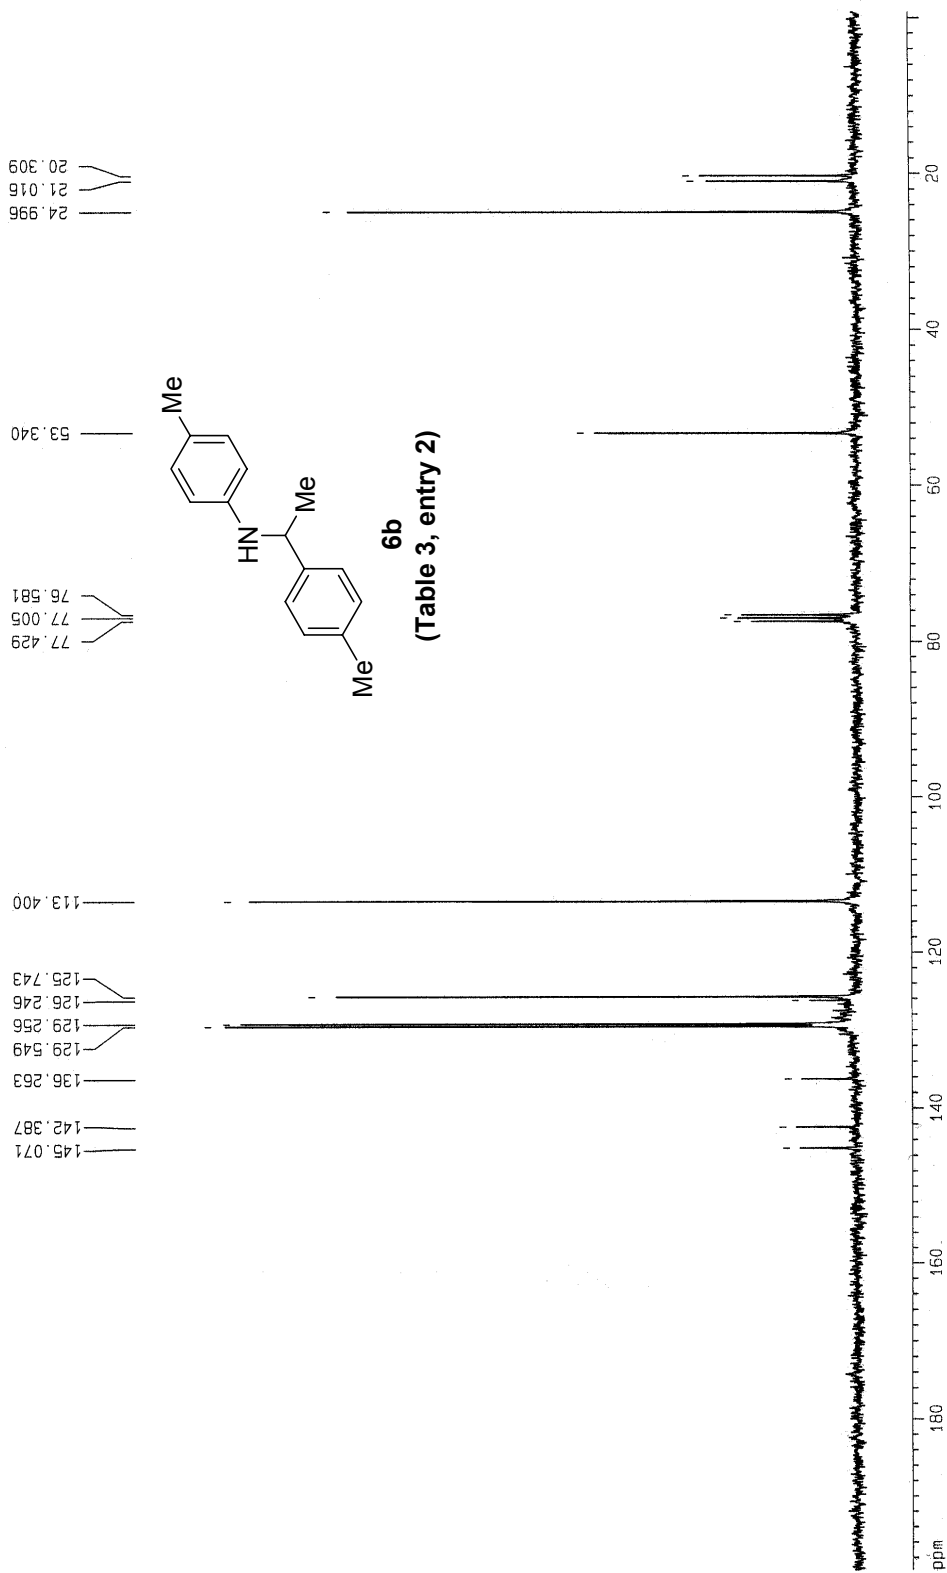

Reacc331-quiral  
080617-coa-08

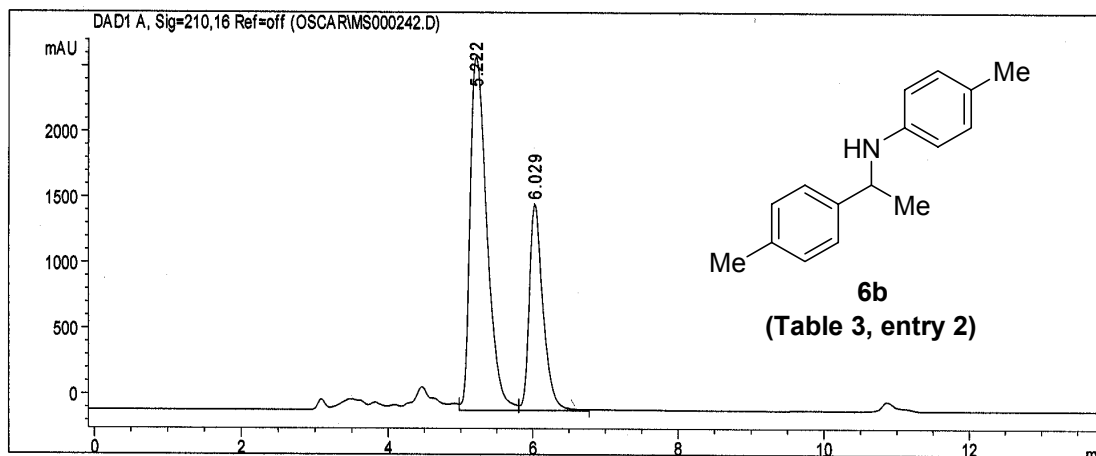

Data File C:\HPCHEM\1\DATA\OSCAR\MS000242.D Sample Name: Reacc331-quiral  
HPLC IQ 18/06/08 5:59:19 PM carmen  
Chiralcel OD 25x 4.6 mm  
hexano/isopropanol 92/8  
flujo 1 ml/min  
Injection Date : 17/06/08 12:40:26 PM  
Sample Name : Reacc331-quiral Vial : 1  
Acq. Operator : carmen  
Acq. Method : C:\HPCHEM\1\METHODS\QUIRAL.M  
Last changed : 17/06/08 9:44:12 AM by carmen  
(modified after loading)  
Analysis Method : C:\HPCHEM\1\METHODS\QUIRAL.M  
Last changed : 18/06/08 4:02:34 PM by carmen  
(modified after loading)

# Area Percent Report

Sorted By : Signal  
Multiplier : 1.0000  
Dilution : 1.0000

Signal 1: DAD1 A, Sig=210,16 Ref=off  
Results obtained with enhanced integrator!

| Peak #   | RetTime [min] | Type | Width [min] | Area [mAU*s] | Height [mAU] | Area %  |
|----------|---------------|------|-------------|--------------|--------------|---------|
| 1        | 5.222         | VV   | 0.2482      | 4.34641e4    | 2694.71753   | 67.4740 |
| 2        | 6.029         | VV   | 0.1993      | 2.09520e4    | 1574.06262   | 32.5260 |
| Totals : |               |      |             | 6.44161e4    | 4268.78015   |         |

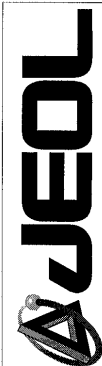

Filename = Reacc395-1H-4.jdf  
 Author = Cabrera  
 Experiment = single\_pulse.exp  
 Sample\_id = Laura  
 Solvent = CHLOROFORM-D  
 Relaxation\_time = 4-SEC-2008 15:48:38  
 Relaxation\_time = 17-APR-2008 10:37:42  
 Current\_time = 17-APR-2008 10:37:46  
 Comment = Single Pulse Experiment  
 Data\_format = 1D COMPLEX  
 Data\_size = 16384  
 Dim\_title = 1H  
 Dim\_units = [ppm]  
 Dimensions = X  
 Site = Eclipse+ 300  
 Spectrometer = DELTA\_NMR  
 Field\_strength = 7.0586013 [T] (300 [MHz]  
 X\_acq\_duration = 3.6339712 [s]  
 X\_domain = 1H  
 X\_offset = 50962  
 X\_points = 16384  
 X\_prescans = 0  
 X\_resolution = 0.27518105 [Hz]  
 X\_sweep = 4.50856628 [kHz]  
 Clipped = FALSE  
 Fod\_return = 1  
 Fod\_size = 32  
 Total\_scans = 32  
 X\_90\_width = 9.5 [us]  
 X\_acq\_time = 3.6339712 [s]  
 X\_angle = 45 [deg]  
 X\_pulse = 4.75 [us]  
 Initial\_wait = 3 [s]  
 Recvr\_gain = 17  
 Relaxation\_delay = 1 [s]  
 Temp\_get = 17.4 [dC]  
 Unblank\_time = 2 [us]

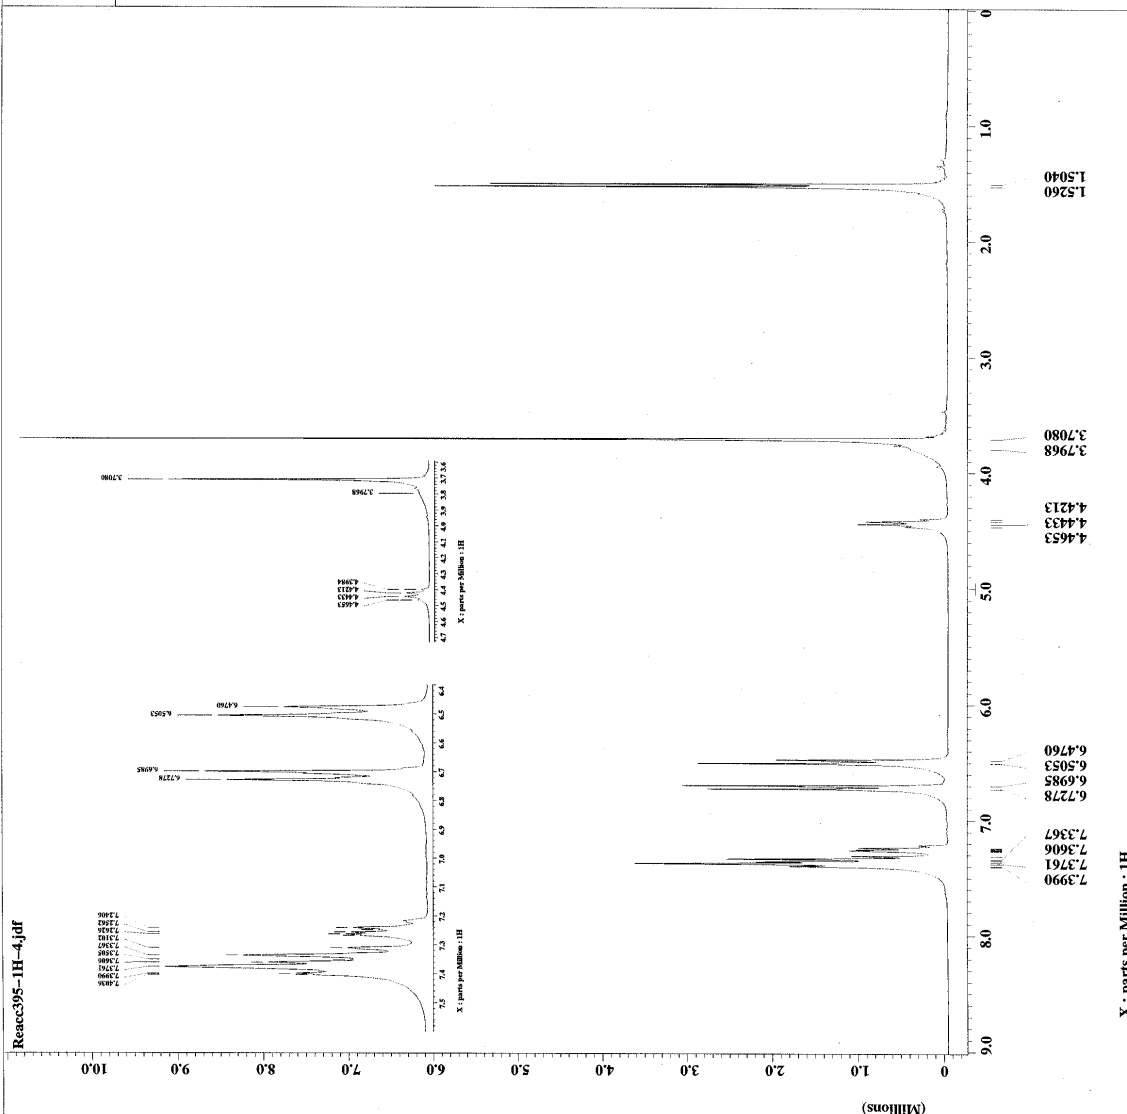

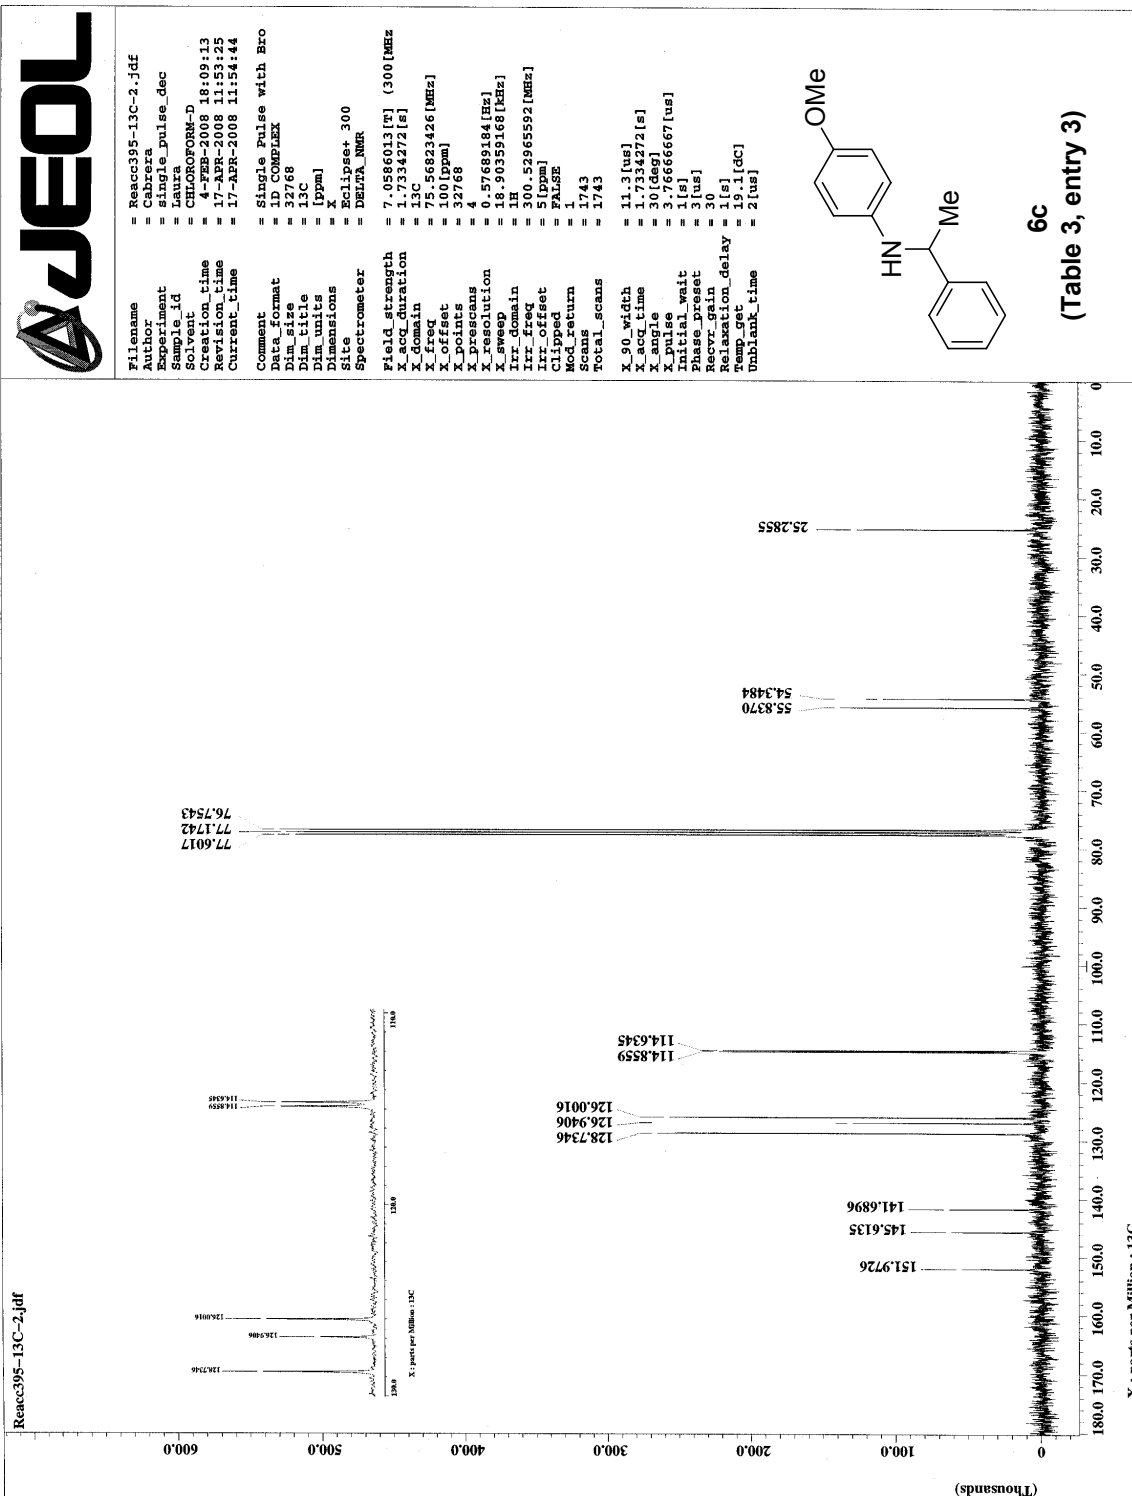

Reacc395  
080616-coa-07

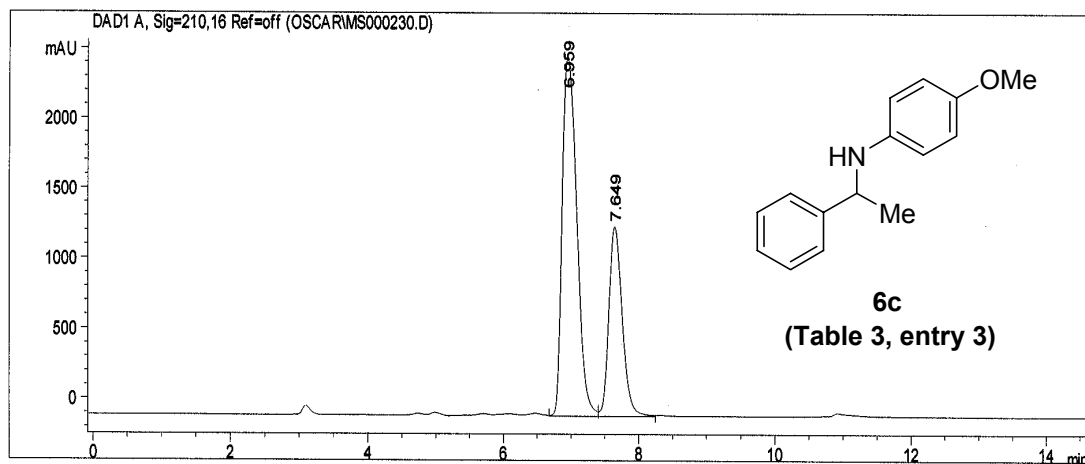

Data File C:\HPCHEM\1\DATA\OSCAR\MS000230.D Sample Name: Reacc395  
HPLC IQ 18/06/08 4:34:31 PM carmen  
Chiralcel OD 25x 4.6 mm  
hexano/isopropanol 92/8  
flujo 1 ml/min  
UV 210

Injection Date : 16/06/08 4:57:00 PM  
Sample Name : Reacc395 Vial : 1  
Acq. Operator : carmen  
Acq. Method : C:\HPCHEM\1\METHODS\QUIRAL.M  
Last changed : 16/06/08 3:24:23 PM by carmen  
(modified after loading)  
Analysis Method : C:\HPCHEM\1\METHODS\QUIRAL.M  
Last changed : 18/06/08 4:02:34 PM by carmen  
(modified after loading)  
para Le legadec

#### Area Percent Report

Sorted By : Signal  
Multiplier : 1.0000  
Dilution : 1.0000

Signal 1: DAD1 A, Sig=210,16 Ref=off  
Results obtained with enhanced integrator!

| Peak #   | RetTime [min] | Type | Width [min] | Area [mAU*s] | Height [mAU] | Area %  |
|----------|---------------|------|-------------|--------------|--------------|---------|
| 1        | 6.959         | VV   | 0.2437      | 3.84775e4    | 2554.97192   | 67.4206 |
| 2        | 7.649         | VV   | 0.2128      | 1.85934e4    | 1349.13049   | 32.5794 |
| Totals : |               |      |             | 5.70709e4    | 3904.10242   |         |

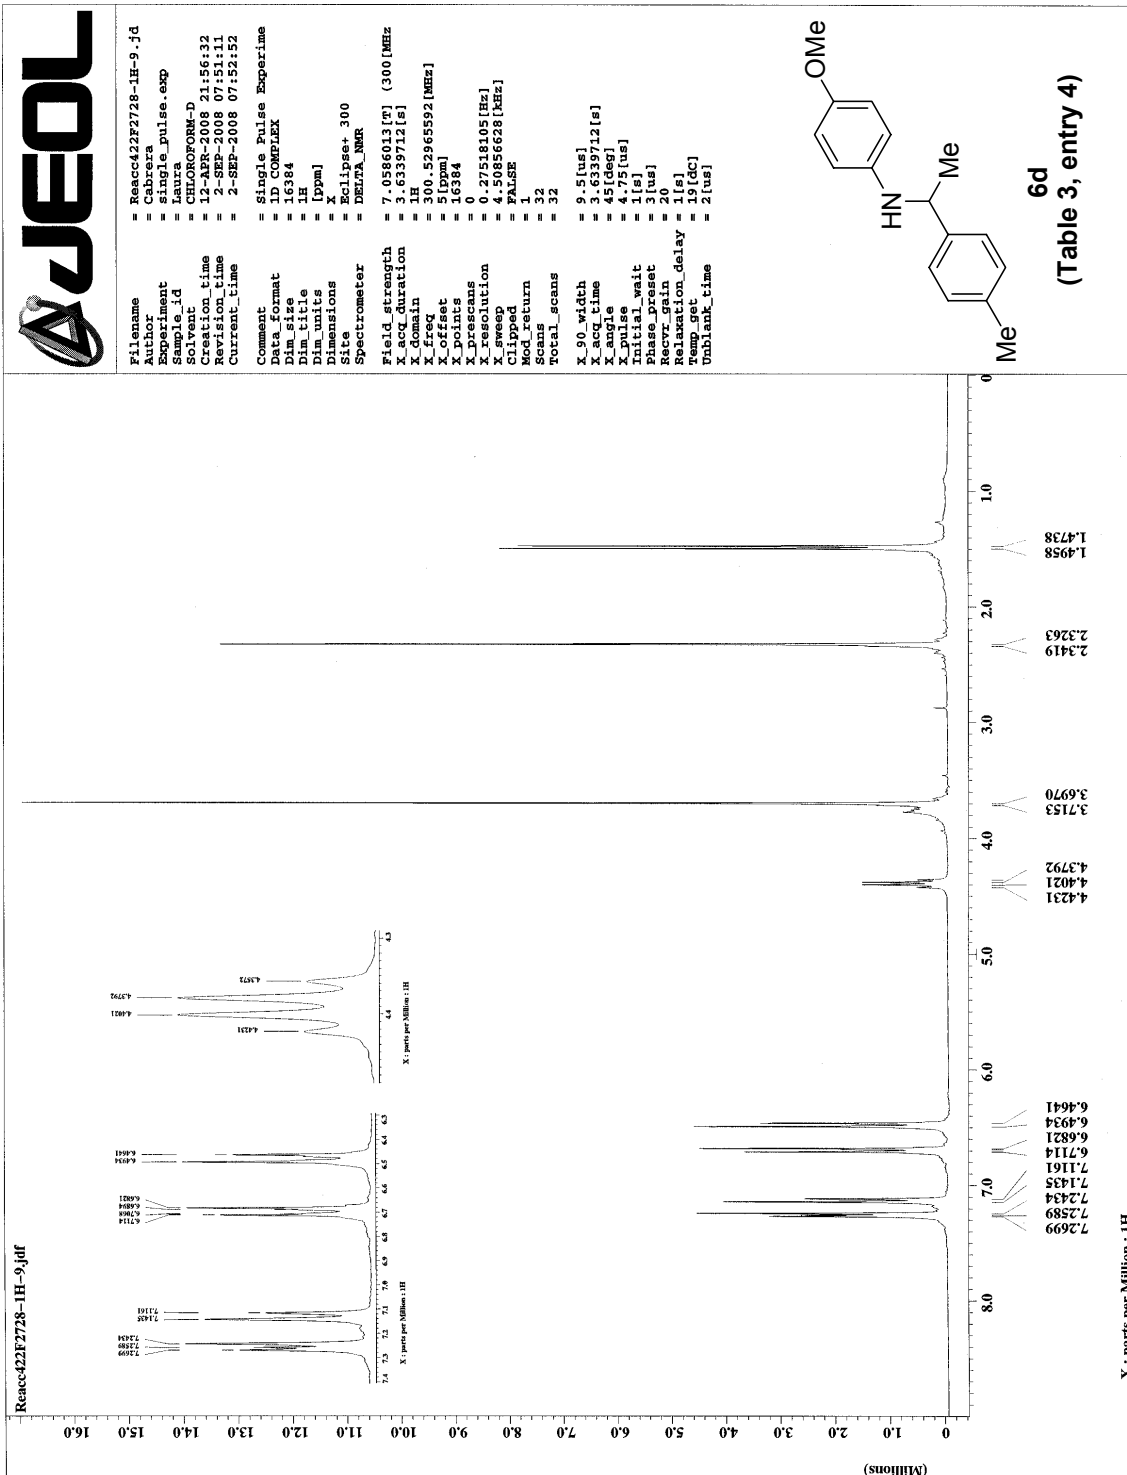

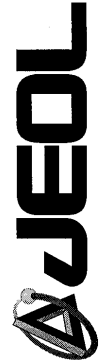

Filename = Reacc422F2728-13C-11.  
Author = Cabrera  
Experiment = single\_pulse\_dec  
Sample\_id = Laura  
Solvent = CHLOROFORM-D  
Creation\_time = 18-APR-2008 09:56:56  
Revision\_time = 2-SEP-2008 07:41:14  
Current\_time = 2-SEP-2008 07:41:35  
Comment = Single Pulse with Bro  
Data\_format = 1D COMPLEX  
Dim\_size = 32768  
Dim\_title = 13C  
Dim\_units = [ppm]  
Dimensions = 1  
File = 1  
Relapse+ 300  
Spectrometer = DELTA\_NMR  
Field\_strength = 7.0586013[T] (300[MHz]  
X\_acq\_duration = 1.7334272[s]  
X\_domain = 13C  
X\_freq = 75.5682342[MHz]  
X\_offset = 100[ppm]  
X\_resolution = 32768  
X\_swept = 4  
X\_resolution = 0.57689184[Hz]  
X\_sweep = 18.90359168[MHz]  
Irr\_domain = 1H  
Irr\_freq = 300.52965592[MHz]  
Irr\_offset = 5[ppm]  
Mapped = FALSE  
Mod\_return = 1  
Scans = 1685  
Total\_scans = 1685  
X\_90\_width = 11.3[us]  
X\_acq\_time = 1.7334272[s]  
X\_angle = 30[deg]  
X\_pulse = 17.6666667[us]  
X\_tail\_wait = 1[s]  
Phase\_preset = 3[us]  
Recvr\_gain = 30  
Relaxation\_delay = 1[s]  
Temp\_get = 21.1[deg]  
Unblank\_time = 2[us]

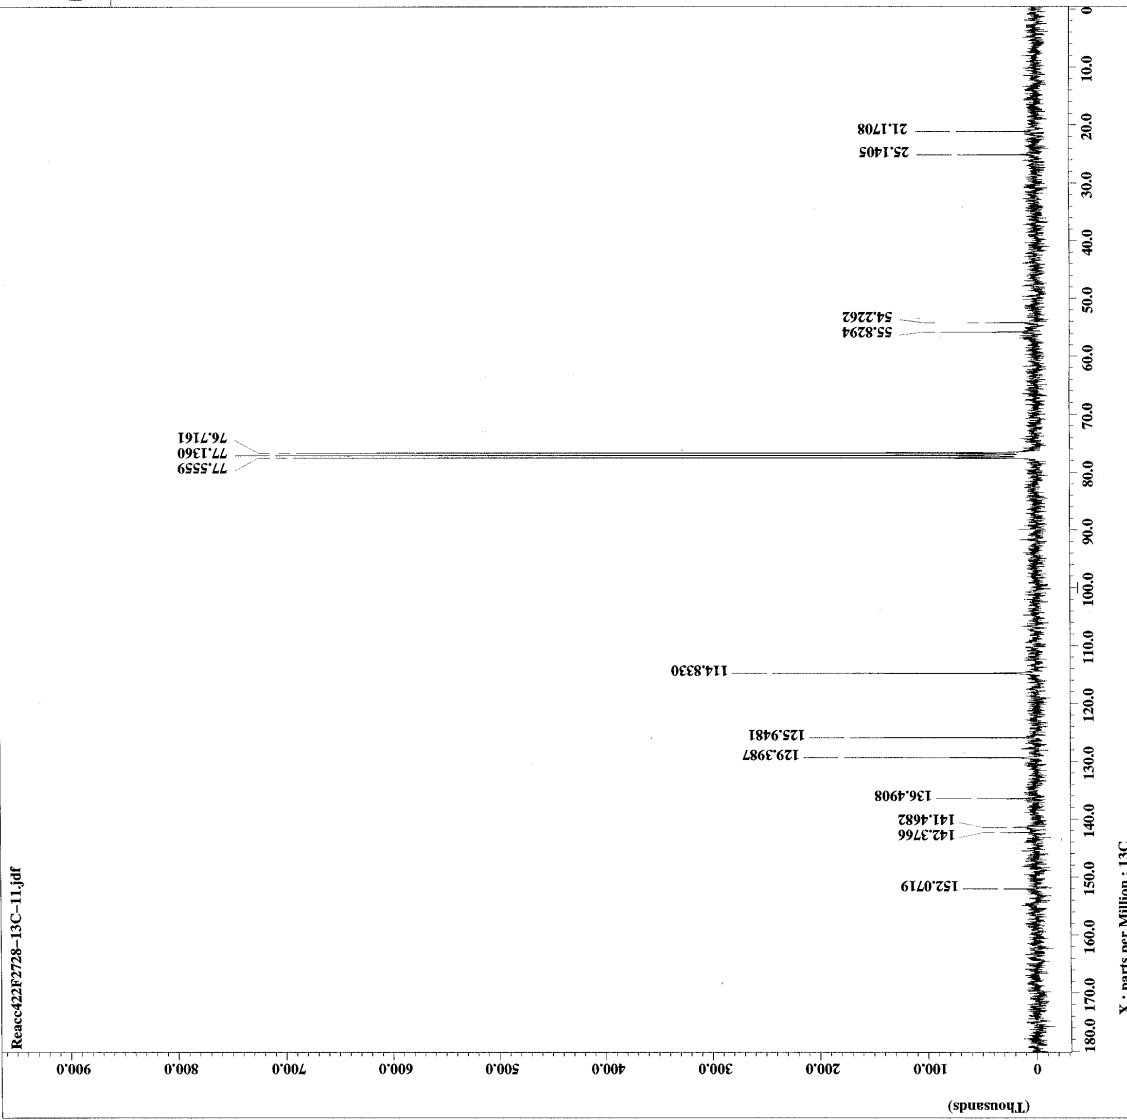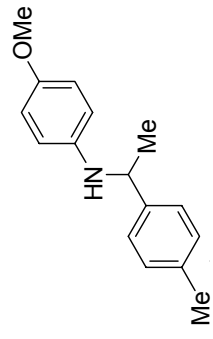

6d  
(Table 3, entry 4)

Data File C:\HPCHEM\1\DATA\OSCAR\MS000288.D

Sample Name: Reacc 422

080630-coa-06  
Chiralcel OD 250x 4.6 mm  
hexano/isopropanol 98/2  
flujo 1 ml/min  
UV 230

=====  
Injection Date : 30/06/08 6:54:03 PM  
Sample Name : Reacc 422  
Acq. Operator : carmen  
Method : C:\HPCHEM\1\METHODS\QUIRAL.M  
Last changed : 30/06/08 6:53:35 PM by carmen  
(modified after loading)

Vial : 1

para Le legadec  
=====

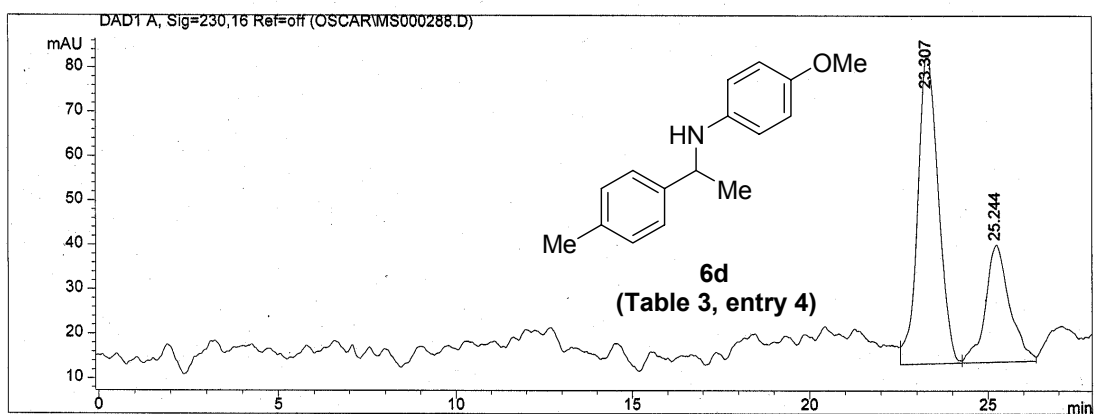

=====  
Area Percent Report  
=====

Sorted By : Signal  
Multiplier : 1.0000  
Dilution : 1.0000

Signal 1: DAD1 A, Sig=230,16 Ref=off  
Results obtained with enhanced integrator!

| Peak # | RetTime [min] | Type | Width [min] | Area [mAU*s] | Height [mAU] | Area %  |
|--------|---------------|------|-------------|--------------|--------------|---------|
| 1      | 23.307        | BV   | 0.6129      | 2792.58521   | 69.48521     | 69.2117 |
| 2      | 25.244        | VV   | 0.6864      | 1242.25806   | 26.33048     | 30.7883 |

Totals : 4034.84326 95.81569

=====  
\*\*\* End of Report \*\*\*  
=====

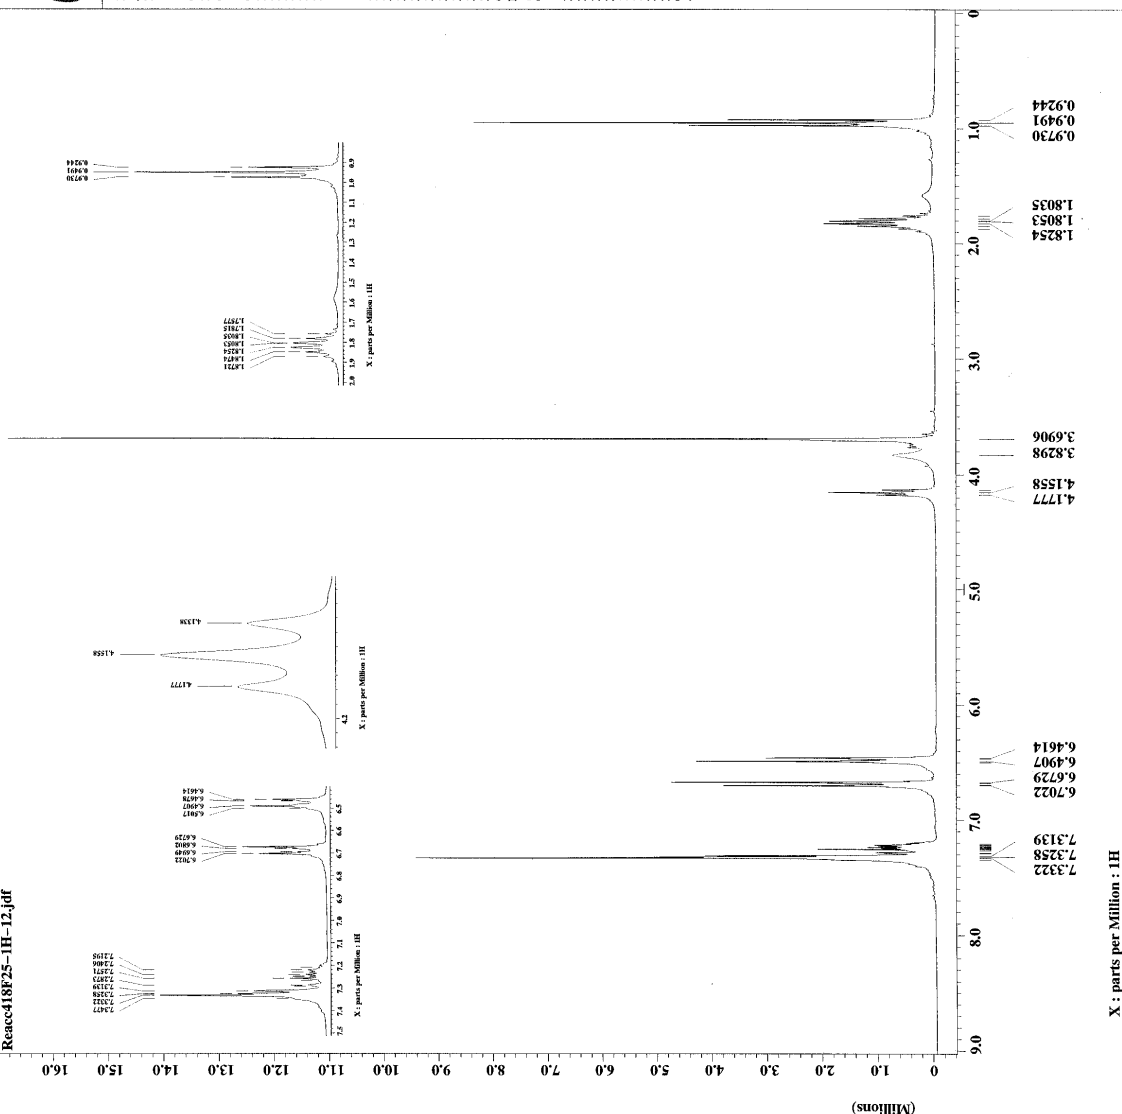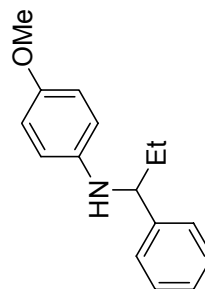

**6e**  
(Table 3, entry 5)

|               |                            |
|---------------|----------------------------|
| Filename      | h30c410925-1H-12.jdl       |
| Path          | C:\Users\chlored\Documents |
| Experiment    | single_pulse.exp           |
| Sample_id     | LAURA                      |
| ChemicalShift | CHLOROPORM-D               |
| Creation time | 31-MAN-2008 03:43:41       |
| Revision time | 2-SEP-2008 07:37:17        |
| Revision time | 2-SEP-2008 07:39:13        |
| Current time  |                            |
| Comment       | 1D COMPLEX                 |
| Data format   | 16384                      |
| Dim size      | 1H                         |
| Dim title     |                            |
| Dim units     | [ppm]                      |
| Dim constants |                            |
| Acq site      | Eolipser- 300              |
| Acq site      | DELTA_NMR                  |
| Spectrometer  |                            |
| Acq strength  | 7.05368113 [T] (300 [MHz]  |
| X channel     | 3.6339712 [s]              |
| Y channel     | 300.52665592 [MHz]         |
| Z channel     | 5 [ppm]                    |
| X offset      | 16384                      |
| X points      | 0                          |
| X prescans    | 0.27518105 [Hz]            |
| X resolution  | 0.27518105 [Hz]            |
| X sweep       | FALSE                      |
| Y offset      | 0                          |
| Y prescans    | 1                          |
| Y resolution  | 0                          |
| Y sweep       | FALSE                      |
| Z offset      | 0                          |
| Z prescans    | 32                         |
| Z resolution  | 32                         |
| Z sweep       | FALSE                      |
| Mod return    | 1                          |
| Scans         | 32                         |
| Total_scans   | 32                         |
| X 90_width    | 9.5 [us]                   |
| X 90_time     | 3.6339712 [s]              |
| X angle       | 45 [deg]                   |
| Y pulse       | 4.75 [us]                  |
| Initial_wait  | 1 [s]                      |
| Phase_preset  | 3 [us]                     |
| Recvr gain    | 40                         |
| Temp set      | 18.9 [dC]                  |
| Unblank time  | 2 [us]                     |

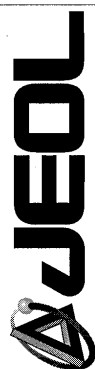

Filename = Reacc418F2526-13C-8.j  
Author = Cabrera  
Experiment = single\_pulse\_dec  
Sample\_id = Laura  
Solvent = CHLOROFORM-D  
Creation\_time = 31-MAR-2008 09:36:14  
Revision\_time = 31-MAR-2008 07:52:44  
Current\_time = 3-SEP-2008 07:52:44  
Comment = single Pulse with Bro  
Data\_format = 1D COMPLEX  
Dim\_size = 32768  
Dim\_title = 13C  
Dim\_units = [ppm]  
Dimensions = X, Y, Z  
Site = 300  
Spectrometer = DELTA\_NMR  
Field\_strength = 7.0586013[T] (300[MHz]  
X\_acq\_duration = 1.7334272[s]  
X\_domain = 13C  
X\_freq = 75.56823426[MHz]  
X\_offset = 100[ppm]  
X\_resolution = 25768  
X\_sweep = 4  
X\_domain = 13C  
X\_resolution = 0.57689184[Hz]  
X\_sweep = 18.90359168[kHz]  
Irr\_domain = 1H  
Irr\_freq = 300.52965592[MHz]  
Irr\_offset = 5[ppm]  
Clipped = FALSE  
Acq\_return = 1  
Scans = 3000  
Total\_scans = 3000  
X\_90\_width = 11.3[us]  
X\_acq\_time = 1.7334272[s]  
X\_angle = 30[deg]  
X\_pulse = 3.7666667[us]  
X\_pulse\_wait = 1[us]  
Phase\_preset = 30  
Recvr\_gain = 30  
Relaxation\_delay = 1[s]  
Temp\_get = 20.8[dc]  
Unblank\_time = 2[us]

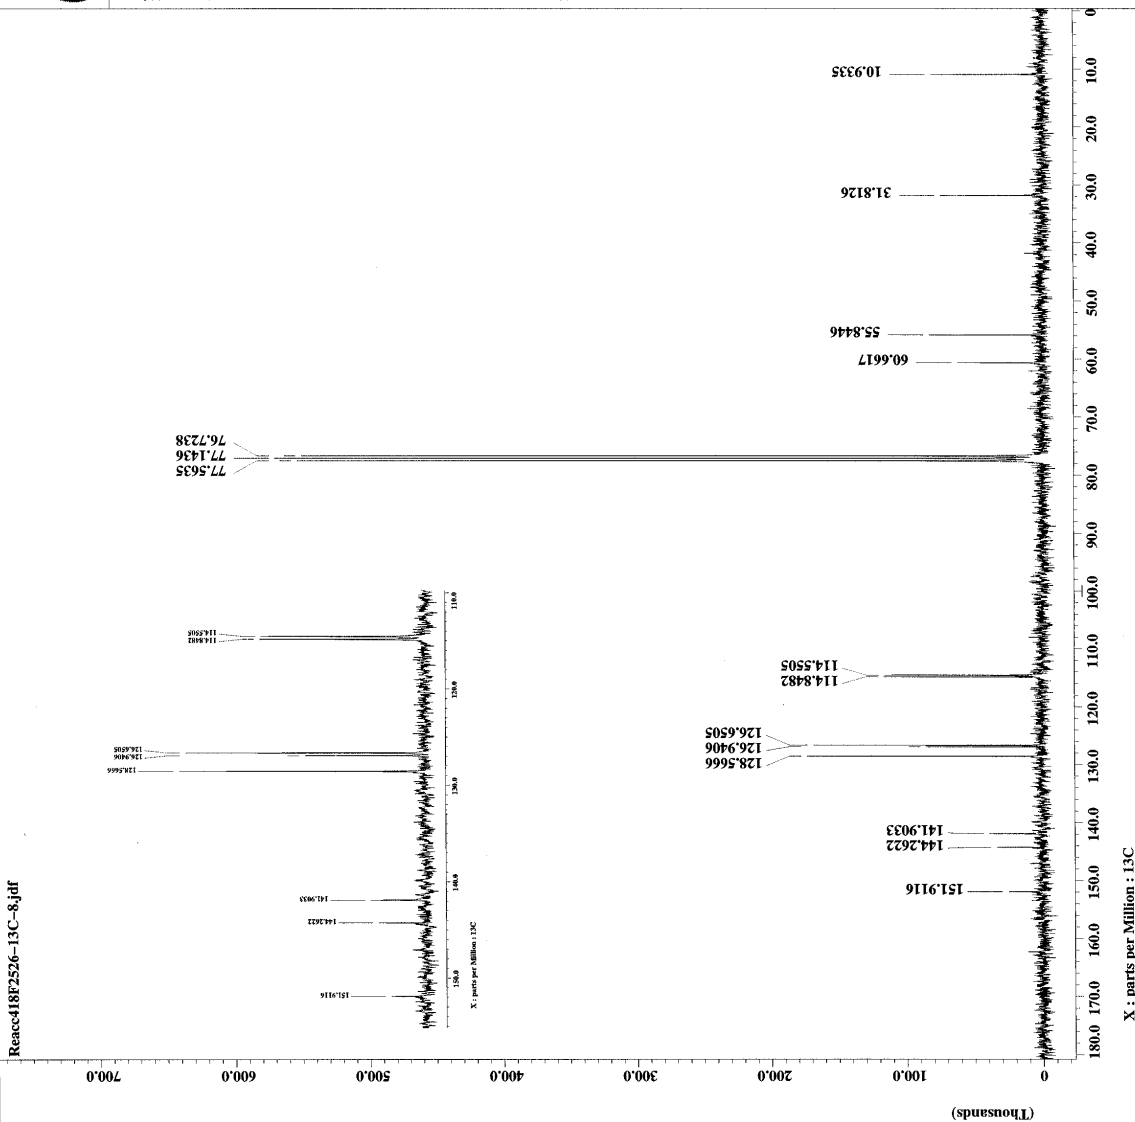

Reacc418F27  
080616-coa-06

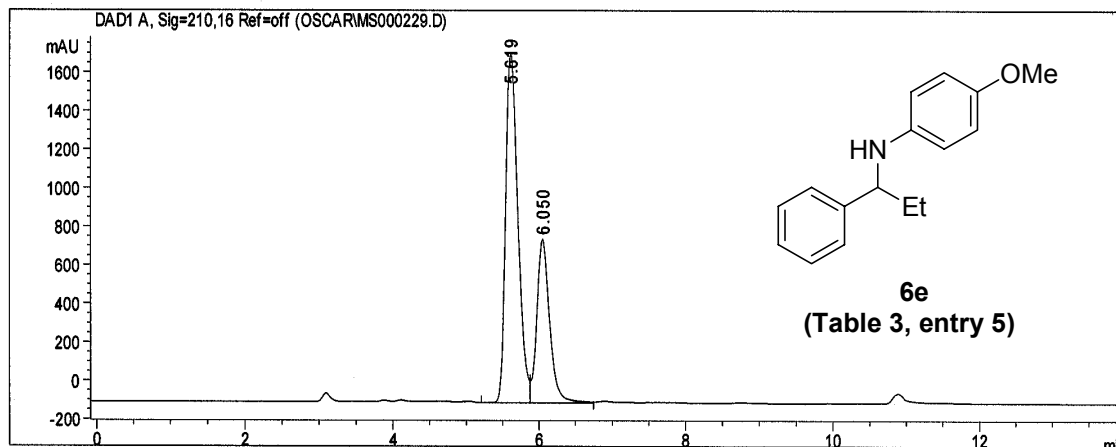

Data File C:\HPCHEM\1\DATA\OSCAR\MS000229.D Sample Name: Reacc418F27  
HPLC IQ 18/06/08 4:29:26 PM carmen

Chiralcel OD 25x 4.6 mm  
hexano/isopropanol 92/8  
flujo 1 ml/min  
UV 210

Injection Date : 16/06/08 4:42:14 PM  
Sample Name : Reacc418F27 Vial : 1  
Acq. Operator : carmen  
Acq. Method : C:\HPCHEM\1\METHODS\QUIRAL.M  
Last changed : 16/06/08 3:24:23 PM by carmen  
(modified after loading)  
Analysis Method : C:\HPCHEM\1\METHODS\QUIRAL.M  
Last changed : 18/06/08 4:02:34 PM by carmen  
(modified after loading)

#### Area Percent Report

Sorted By : Signal  
Multiplier : 1.0000  
Dilution : 1.0000

Signal 1: DAD1 A, Sig=210,16 Ref=off  
Results obtained with enhanced integrator!

| Peak #   | RetTime [min] | Type | Width [min] | Area [mAU*s] | Height [mAU] | Area %  |
|----------|---------------|------|-------------|--------------|--------------|---------|
| 1        | 5.619         | VV   | 0.1852      | 2.12812e4    | 1809.30591   | 67.1939 |
| 2        | 6.050         | VV   | 0.1864      | 1.03901e4    | 851.18237    | 32.8061 |
| Totals : |               |      |             | 3.16713e4    | 2660.48828   |         |
